# Supplementary material for: Quantitative trait loci associated with soft wheat quality in a cross of good by moderate quality parents
Source: PeerJ. 2018 Mar 23;6:e4498. doi: 10.7717/peerj.4498 (PMC5868479; doi:10.7717/peerj.4498)
Supplement: Supplemental Information 1 [file peerj-06-4498-s001.xls]

## Sheet: allVA2
NAME	TW	PRO	AWRC	LA	LAADJ	H2O	SUC	NACO	FYLD	SE	CD	TG	xgwm99	barc263	xgwm213	barc120	xgwm268	barc81	barc137	barc181	wmc44	xgwm264	xgwm273	xgwm337	barc271	xgwm232	barc119	xgwm47	xgwm312	wmc24	wms1053	xgwm328	xgwm311	xgwm372	xgwm636	xgwm257	xgwm501	barc55	barc200	wmc154	xgwm319	xgwm526	xgwm261	barc12	xgwm30	xgwm77	barc77	barc147	wmc78
OH02-16161	59	10.15	53.54	96.14	88.02	52.15	86.2	63.95	70.9	51.51	18.1	7	b	b	a	b	a	b	b	a	a	-	a	b	b	a	h	b	b	a	a	a	a	a	b	b	b	b	b	a	b	a	a	a	a	a	b	a	a
OH02-16162	58.73	10.76	56.07	107.56	95.4	54.23	90.53	67.29	69.07	53.36	18.1	7	b	b	b	b	a	a	h	h	a	a	a	b	a	a	a	b	b	b	a	a	b	a	b	b	b	h	h	a	b	b	b	h	b	a	a	b	a
OH02-16163	57.42	10.27	53.98	99.88	91.19	51.05	84.3	63.5	69.74	54.57	18.1	8	b	a	b	a	b	a	a	a	b	b	a	a	a	b	b	b	-	b	a	a	b	b	b	b	a	b	b	b	b	b	b	h	b	h	b	b	h
OH02-16164	59.49	10.52	53.47	107.81	97.14	51.8	85.57	62.52	71.15	50.47	17.9	4	b	b	b	a	b	b	h	a	b	a	a	a	b	a	-	b	b	b	b	b	b	a	a	a	a	b	b	b	b	a	a	a	a	a	b	b	a
OH02-16165	59.65	10.14	53.93	99.46	91.53	51.19	84.17	62.48	71.13	51.12	18.3	5	b	b	a	a	a	b	h	h	b	a	a	b	b	a	h	b	h	-	a	b	a	a	b	a	a	a	b	a	b	a	a	a	a	a	a	h	a
OH02-16166	56.38	10.36	54.06	100.66	91.39	49.67	83.65	62.95	72.68	55.52	18.4	5	b	b	b	a	-	a	h	h	b	b	a	a	b	b	b	b	h	a	b	a	b	a	b	a	b	a	-	b	b	b	b	a	a	b	b	h	b
OH02-16167	57.77	10.57	52.63	110.12	99.34	51.63	85.73	62.78	71.31	52.37	17.7	6	a	b	b	a	b	b	b	h	a	b	a	b	b	b	b	b	a	h	a	a	a	a	b	a	b	b	b	b	b	a	b	h	b	a	-	a	h
OH02-16168	57.31	9.52	54.61	93.92	90.49	51.85	86.02	65.11	71.57	55.76	17.7	4	a	a	b	a	b	b	a	h	h	a	a	b	b	b	h	a	a	a	b	a	a	a	b	a	b	b	h	b	a	b	b	b	b	a	b	h	b
OH02-16169	60.25	10.49	55.43	122.95	112.66	54.45	90.41	65.35	70	50.32	17.5	4	a	a	b	b	a	b	h	a	b	a	a	b	a	b	h	-	b	a	b	a	a	b	a	a	b	b	b	b	a	a	b	a	a	a	b	h	a
OH02-16170	58.35	9.96	54.42	81.54	74.99	51.73	87.05	64.56	71.44	54.63	17.9	4	b	a	b	b	b	b	a	b	b	a	b	b	b	a	b	b	b	a	b	b	b	a	a	a	a	a	b	b	b	a	a	b	a	a	a	b	a
OH02-16171	59.14	10.42	53.15	98.08	88.16	51.83	82.12	61.97	72.65	47.19	18	6	b	b	b	b	a	a	h	a	a	b	a	b	b	b	h	b	h	a	a	b	b	a	b	b	a	a	b	b	b	b	b	a	a	b	b	b	b
OH02-16172	58.36	10.15	53.54	85.83	77.92	51.14	84.72	62.56	72.14	53.07	18.1	3	b	a	b	b	h	a	a	h	a	b	a	b	-	a	b	b	h	a	a	b	b	a	b	b	b	b	b	h	b	a	b	h	b	h	b	h	b
OH02-16173	58.84	9.15	54.4	102.98	101.95	51.56	86.98	65.78	70.49	56.15	18.1	6	b	b	b	b	a	a	h	a	a	b	a	b	b	a	a	a	b	b	b	b	a	b	b	a	b	b	a	a	a	b	a	b	b	b	b	a	b
OH02-16174	59.12	9.75	53.4	109.68	104.53	50.92	85.28	62.35	71.12	52.87	17.9	4	b	-	a	a	b	a	a	a	b	b	a	b	a	a	b	h	b	b	a	b	b	b	a	a	b	a	h	b	b	a	a	a	a	b	b	b	h
OH02-16175	59.58	10.66	53.22	111.62	100.14	51.4	84.88	63.01	71.61	50.93	17.5	3	b	a	b	b	b	b	a	a	a	b	a	a	h	b	h	h	a	a	b	b	a	a	a	a	b	a	h	h	b	b	b	b	a	h	b	h	h
OH02-16176	58.81	10.08	56.51	122.3	114.76	53.88	93.39	68.59	69.26	55.19	17.8	6	a	b	b	b	b	a	a	a	b	a	a	a	a	b	h	a	b	h	b	a	b	b	a	a	b	b	b	b	a	b	b	a	b	a	a	b	a
OH02-16177	57.06	10.24	55.71	97.52	88.76	53.55	86.87	67.48	70.01	52.22	17.7	6	b	a	b	b	a	b	a	a	a	b	a	b	-	b	h	a	b	a	a	a	b	b	b	b	b	b	h	a	a	b	a	a	-	h	a	b	h
OH02-16178	58.99	10.51	53.28	99.1	88.54	51.38	84.87	62.44	71.42	51.8	18.4	8	a	b	b	a	b	a	a	a	a	a	a	a	a	a	-	b	b	a	b	b	b	a	a	b	a	b	b	b	b	a	b	a	b	a	a	b	a
OH02-16179	58.25	10.91	55.9	96.45	83.16	53.87	88.15	67.03	70.07	53.46	17.6	3	a	b	b	b	b	a	b	b	b	b	b	a	a	b	a	b	b	b	a	a	b	b	b	b	a	h	b	b	b	b	b	a	h	b	h	a	b
OH02-16181	56.98	9.85	54.38	105.36	99.5	52.85	86.52	63.56	70.83	53.74	17.9	6	b	b	b	b	a	a	a	a	b	a	a	a	b	a	h	b	b	b	a	b	a	h	b	a	a	a	b	h	b	b	b	a	h	h	a	a	h
OH02-16182	59.67	9.93	52.9	106.59	99.99	49.46	82.83	61.29	71.07	52.41	18.2	3	b	a	b	b	a	b	a	a	b	b	a	a	b	b	h	b	b	b	a	b	a	b	b	b	b	b	b	a	b	b	b	a	a	h	a	a	b
OH02-16183	57.77	9.85	54.89	95.15	89.11	51.17	87.69	65.68	69.78	56.3	17.7	3	a	b	b	b	b	b	a	b	b	b	b	b	a	b	b	a	b	b	b	a	h	b	b	b	b	b	a	-	a	a	b	a	a	b	a	a	b
OH02-16185	58.27	10.48	54.59	105.65	95.39	52.53	89.35	64.97	70.18	52.85	17.8	5	a	b	a	b	b	b	a	b	b	b	b	a	-	b	a	b	b	h	b	a	a	a	a	b	a	a	b	b	.	b	a	b	b	b	h	b	h
OH02-16186	57.06	9.8	53.53	99.64	94.15	50.29	84.05	62.49	70.29	56.06	18.3	6	b	b	b	a	a	b	a	a	a	b	a	a	b	b	h	h	b	h	b	a	a	a	a	a	a	a	b	h	b	a	b	b	a	b	h	a	b
OH02-16187	57.68	9.91	52.86	87.55	81.26	51.07	82.55	61.79	73.54	52.91	18.3	6	b	a	b	b	b	b	b	a	h	b	a	h	-	b	h	b	b	b	b	b	b	a	b	a	a	a	a	b	b	b	b	b	b	b	b	b	a
OH02-16188	60.27	10.2	53.1	102.04	93.78	52.03	84.63	62.91	72.21	50.27	18.1	5	a	h	b	b	a	a	b	a	b	a	a	b	b	a	b	b	h	b	b	a	b	b	a	a	a	a	b	b	b	a	b	b	a	a	a	a	a
OH02-16189	59.59	9.74	54.05	89.93	84.87	51.02	85.75	64.24	71.57	52.52	18.1	3	a	a	a	b	h	a	b	a	a	a	a	a	b	b	a	b	h	a	a	b	a	b	a	b	b	a	b	b	b	b	a	a	b	a	a	b	a
OH02-16190	57.49	10.15	55.82	94.05	85.9	52.47	84.76	65.37	70.37	57.69	18.3	6	a	b	b	a	b	b	a	b	a	a	a	b	a	b	b	a	h	b	b	a	b	a	b	b	a	b	a	a	a	b	h	a	a	a	h	h	a
OH02-16191	59.16	10.11	52.97	105.57	97.7	50.16	82.57	60.61	72.3	50.61	18.1	5	a	b	a	b	h	a	b	a	b	h	a	a	b	b	b	b	h	a	b	b	b	h	a	b	b	-	b	b	b	a	b	h	b	h	b	b	a
OH02-16192	59.5	9.29	54.08	103.93	102.04	52.05	86.38	64.06	71.33	51.9	18.3	6	a	b	b	a	a	b	a	a	b	a	a	h	a	a	b	a	b	a	b	a	a	h	b	b	b	b	a	a	a	b	b	a	a	a	-	b	a
OH02-16193	59.42	9.93	55.06	89.23	82.79	51.33	84.7	63.58	71.39	54.13	18.1	5	b	b	b	b	a	a	a	b	b	a	a	a	b	a	b	b	a	b	a	b	h	b	a	a	a	b	b	b	b	a	b	a	a	a	a	a	a
OH02-16194	59.08	10.49	54.57	93.71	83.37	52.7	87.62	64.93	71.3	50.84	17.7	4	a	b	a	a	a	b	a	a	a	a	a	b	b	a	a	b	a	b	h	a	b	a	a	a	a	a	b	b	b	a	-	a	-	a	a	h	a
OH02-16195	59.32	9.6	52.83	109.15	105.14	50.6	84.73	61.71	71.54	53.94	18.3	7	b	b	a	b	b	a	h	h	b	b	a	a	b	b	h	h	h	b	a	b	a	b	b	b	a	b	a	h	b	a	b	a	h	b	a	h	b
OH02-16196	59.19	10.49	53.71	113.31	102.95	52.29	86.73	63.21	73.03	47.25	17.7	2	b	a	b	b	a	a	h	a	a	b	a	b	a	a	h	h	a	a	a	a	a	b	b	b	b	b	h	a	b	b	b	a	b	a	b	b	b
OH02-16197	58.91	10.16	52.42	95.89	87.89	50.6	82.8	61.14	72.97	49.41	18.1	5	a	b	b	b	a	b	b	a	a	b	a	a	b	b	a	b	b	b	a	a	b	a	b	h	a	a	b	h	b	a	b	a	a	b	a	h	b
OH02-16198	57.05	10.62	56.15	92.91	81.61	53.25	93.12	68.82	68.39	56.56	17.3	2	a	b	b	a	b	a	a	b	b	b	b	a	b	b	b	b	b	h	b	b	b	a	b	b	a	a	b	h	b	a	b	b	h	a	a	b	b
OH02-16199	59.28	9.98	53.84	91.27	84.36	51.07	83.44	61.81	72.65	52.62	18.4	5	a	b	h	b	b	b	b	b	b	a	a	b	a	a	b	b	h	b	a	b	a	a	b	h	a	a	a	a	b	a	a	a	a	h	a	a	a
OH02-16201	59.44	10.27	55.13	98.41	89.63	52.95	88.88	65.18	70.62	53.23	18.2	6	a	b	a	a	h	b	b	h	a	a	a	a	b	a	b	b	b	a	a	b	h	b	b	b	a	a	b	h	b	a	b	-	a	a	b	a	a
OH02-16202	59.96	10	54.86	93.88	87.12	52.33	84.58	63.58	70.18	48.85	17.7	4	a	b	b	b	a	a	b	h	b	b	a	b	b	b	b	b	b	b	b	b	a	a	b	b	a	a	h	h	b	a	a	b	a	a	b	b	a
OH02-16203	58.59	9.56	52.79	103.18	99.25	48.94	83.68	61.79	71.01	55.77	18.4	5	a	b	b	a	h	b	a	h	a	h	a	b	b	b	b	b	a	h	a	a	b	a	b	b	a	a	h	b	b	a	a	a	a	h	b	a	h
OH02-16204	57.49	9.33	54.42	104.69	102.49	52.25	87.86	65.38	70.18	55.14	17.8	5	a	a	b	a	h	b	b	a	b	b	a	b	a	a	b	a	b	a	b	a	b	a	a	b	b	a	h	a	a	b	b	b	b	h	b	a	h
OH02-16205	57.71	9.64	54.23	101.58	97.08	51.75	86.82	63.92	70.69	52.65	17.8	4	b	b	h	b	h	a	b	a	a	b	a	a	a	a	b	a	-	a	h	a	b	b	a	a	b	a	h	a	a	b	b	b	h	b	-	h	b
OH02-16206	57.57	9.96	55.36	102.29	95.64	52.73	89.05	65.88	69.46	55.65	17.7	5	b	b	h	b	b	a	b	a	b	a	a	b	-	a	b	a	b	b	b	a	a	a	a	a	h	b	h	a	h	a	a	a	h	a	b	b	a
OH02-16207	57.92	9.88	53.83	95.56	89.34	50.85	85.2	63.87	70.31	56.05	18.1	4	a	a	h	a	b	a	a	b	a	a	a	b	-	a	b	b	b	h	a	a	a	b	a	a	a	a	b	b	b	b	b	h	h	a	b	h	a
OH02-16208	57.62	10.27	53.66	108.91	100.05	51.33	86.79	64.34	70.08	53.21	18.2	6	a	b	a	b	a	b	a	a	b	b	a	b	a	a	b	b	b	b	a	b	b	a	b	b	a	b	b	a	b	b	a	a	b	a	b	h	a
OH02-16209	59.18	10.42	54.38	114.07	104.13	51.9	88.46	64.5	70.74	53.09	17.7	3	a	a	a	a	b	b	a	a	b	b	a	b	b	a	b	b	b	a	a	a	a	a	a	b	a	a	b	a	b	b	a	b	a	b	-	h	b
OH02-16210	58	9.66	59.6	102.14	97.55	54.22	92.97	71.88	68.91	61.05	17.5	2	a	b	a	a	b	a	a	b	b	b	b	a	b	a	b	b	b	b	a	a	a	a	a	b	b	a	b	b	b	a	a	b	a	a	a	b	b
OH02-16211	58.95	10.56	55.04	95.95	85.07	53.33	87.16	64.12	71.17	52.5	17.6	5	a	b	a	a	b	b	a	a	a	a	b	b	a	-	a	b	b	a	a	a	a	a	a	b	b	a	b	a	b	b	a	b	a	a	b	-	a
OH02-16212	56.91	10	59.86	86.6	79.63	51.87	85.53	65.12	71.96	56.45	18	4	a	b	b	b	a	h	b	b	a	b	b	b	b	a	b	b	a	h	a	a	a	b	a	a	a	a	b	a	b	a	a	a	b	h	b	a	h
OH02-16213	59.16	9.59	58.15	94.17	90.11	52.7	90.24	68.96	70.42	57.66	17.9	3	a	b	b	b	b	a	h	a	a	b	b	a	b	a	b	b	a	b	b	a	a	b	-	a	a	b	b	a	b	a	a	a	a	b	a	a	b
OH02-16214	57.77	10.22	55.08	86.03	77.55	52.27	84.68	64.7	71.9	55.94	18	5	b	b	b	b	b	b	a	b	b	a	b	b	b	b	a	b	b	a	b	b	a	a	a	a	b	-	b	a	b	a	a	b	b	a	a	b	a
OH02-16215	59.05	9.89	56.06	108.22	102.13	53.41	91.21	67.47	70.13	54.93	17.7	4	b	b	b	a	a	a	b	a	a	a	a	b	a	a	b	a	b	a	b	a	a	b	b	a	b	a	a	b	a	b	a	a	h	a	a	a	a
OH02-16216	58.54	9.2	53.29	100.75	99.32	48.86	82.1	61.87	72.84	56.52	18	4	a	b	a	a	a	a	h	a	a	b	a	a	a	b	b	h	a	b	b	b	a	a	b	a	b	a	h	a	b	a	a	b	b	b	b	h	h
OH02-16217	57.45	10.35	54.22	107.74	98.3	52.47	86.85	63.78	71.76	53.08	17.8	5	a	a	a	a	a	a	a	a	a	b	a	b	b	b	b	b	b	a	a	a	b	a	b	a	a	b	b	b	b	a	b	a	b	b	b	a	b
OH02-16218	58.64	10.09	52.46	101.8	94.07	49.99	81.71	60.05	73.39	49.42	18.5	6	b	b	b	b	a	a	b	a	b	b	a	a	b	a	b	b	h	a	a	b	b	a	b	a	a	a	b	b	b	b	b	a	a	b	-	h	b
OH02-16219	59.26	9.92	52.57	91.04	84.52	49.81	81.22	61.19	72.91	52.43	18.2	7	b	a	a	a	a	a	b	a	h	a	a	b	b	a	b	b	h	a	b	b	b	b	b	a	a	a	b	b	b	b	a	b	b	a	b	h	a
OH02-16221	57.95	10.21	52.56	105.15	96.66	50.28	83.7	61.69	71.82	52.83	18.6	6	b	a	b	b	a	a	b	b	h	b	a	a	a	a	b	b	h	a	b	b	a	b	a	b	a	b	b	a	b	b	a	-	b	b	a	h	b
OH02-16222	59.34	9.71	53.38	105.68	100.69	49.63	84.14	61.75	72.39	53.54	18.1	5	b	b	b	b	a	b	a	a	b	b	a	a	a	b	-	b	h	b	a	b	b	a	b	b	a	a	b	a	b	a	b	a	-	b	b	b	b
OH02-16223	58.25	10.08	53.56	100.68	93.21	51.64	84.43	63.01	72.65	50.95	17.8	3	b	b	a	b	a	b	a	a	b	a	a	b	a	a	-	b	h	b	a	b	a	a	b	a	a	a	b	b	b	a	a	a	b	b	b	h	a
OH02-16224	58.2	9.92	52.66	109.92	103.54	49.73	82.38	61.92	72.48	54.03	18.5	8	a	a	a	-	a	b	a	a	b	b	a	a	b	b	a	b	b	a	a	a	a	b	b	a	a	a	a	a	b	a	b	a	b	b	a	a	b
OH02-16225	58.57	10.71	56.19	86.36	74.32	54.02	88.42	69.09	69.95	54.6	16.9	1	a	b	b	b	a	b	b	b	a	a	b	b	b	b	b	a	a	b	b	a	a	a	b	a	b	b	a	a	a	b	b	b	h	a	b	h	a
OH02-16226	57.78	10	54.58	100.56	93.61	52.3	86.35	64.62	71.07	51.68	17.8	5	a	b	a	b	a	b	b	b	b	a	a	b	b	b	h	b	a	b	a	b	a	a	b	b	b	a	b	a	b	a	b	h	b	a	a	h	a
OH02-16227	58.34	10.45	52.94	98.35	88.25	51.29	83.88	62.51	72.65	52.01	17.9	5	a	a	a	b	a	a	b	h	-	b	a	a	a	a	b	b	b	h	a	b	a	a	a	b	b	a	b	b	b	a	b	a	a	b	b	a	h
OH02-16228	57.69	9.56	54.53	92.21	88.44	52.24	85.52	65.29	70.76	53.67	18	4	b	a	b	a	a	b	b	h	b	a	a	b	b	a	b	b	h	b	a	b	b	b	a	a	b	a	b	b	b	b	b	b	h	a	b	h	a
OH02-16229	58.33	10.43	54.19	88.29	78.38	51.36	82.09	61.75	71.45	49.72	18.1	5	a	b	a	a	a	a	b	b	a	a	a	h	-	a	h	b	h	a	b	b	a	a	a	a	b	a	b	b	b	a	b	b	a	a	a	b	a
OH02-16230	58.83	10.02	54.76	100.62	93.67	52.72	84.33	64.15	72.39	49.56	17.8	5	a	b	a	b	h	a	-	a	b	a	a	b	a	a	b	h	a	h	a	b	a	b	a	a	b	a	b	a	b	b	b	a	b	a	b	a	a
OH02-16231	59.15	9.63	53.3	94.37	89.79	50.91	83.65	62.63	72.43	52.35	18	4	b	b	b	b	h	a	b	a	b	a	a	h	-	a	b	h	h	h	a	b	a	b	b	a	b	a	h	a	b	b	b	a	b	h	-	b	a
OH02-16233	57.1	10.58	52.61	101.47	90.58	49.7	81.1	60.12	73.31	50.5	18.2	5	a	a	b	a	b	b	a	h	h	a	a	h	b	b	b	b	a	a	b	b	b	b	b	b	a	b	b	b	b	a	b	h	a	a	b	b	h
OH02-16234	59.02	10.37	53.56	104.2	94.48	51.43	83.98	61.25	71.82	47.7	17.9	4	a	b	a	b	a	b	b	a	b	a	a	b	a	b	a	b	a	b	a	a	b	a	b	b	a	a	b	a	b	a	b	a	b	a	a	b	a
OH02-16235	58.33	10.76	52.55	102.3	90.23	51.28	82.63	61.02	73.81	47.59	18.2	6	a	b	a	b	a	a	-	-	h	a	a	a	-	-	b	h	-	-	b	b	b	a	a	a	a	b	b	a	.	a	b	a	-	a	a	a	-
OH02-16236	57.89	10.01	55.82	104.04	96.95	53.73	88.82	65.82	70.24	54.63	17.1	3	a	a	a	a	b	a	b	a	b	b	a	b	b	a	a	a	a	b	a	a	b	b	a	b	b	b	b	b	a	a	-	a	h	a	h	a	h
OH02-16237	56.13	10.5	53.21	100.71	90.24	51.42	86.3	63.44	70.75	54.6	18.2	4	b	a	a	a	b	a	b	a	h	a	a	a	a	a	a	b	a	h	a	a	a	b	b	a	a	b	b	b	b	b	b	h	b	a	a	a	a
OH02-16238	57.53	10.4	54.18	98.02	88.18	51.03	88.56	62.75	70.55	53.14	18.6	8	a	b	b	a	a	b	b	a	a	a	a	a	b	b	h	b	a	-	a	a	b	a	a	b	b	a	b	b	b	a	a	h	b	a	b	a	a
OH02-16241	58.3	10.32	54.85	85.33	76.11	52.39	87.96	65.43	70.96	55.28	18	5	a	b	b	b	b	b	a	b	b	a	b	a	b	b	b	b	h	a	b	a	a	a	a	b	a	a	b	b	b	a	b	b	a	a	b	b	-
OH02-16242	57.28	10.71	53.48	97.81	86.03	52.52	83.89	64.5	70.99	52.01	17.8	3	a	a	b	b	b	a	b	a	h	a	a	a	b	a	b	b	b	h	a	a	a	b	a	a	a	b	b	h	a	a	a	h	h	h	a	h	h
OH02-16243	57.41	10.3	54.81	103.58	94.57	52.43	86.43	63.47	69.94	51.28	17.6	5	b	b	a	b	b	b	b	a	b	a	a	h	h	b	h	a	b	b	a	a	b	a	a	a	a	b	h	a	a	b	b	b	a	h	a	b	h
OH02-16244	56.93	9.95	54.83	95.72	89.23	51.44	90	65.55	70.7	57.08	18.3	7	b	b	b	a	b	b	b	b	b	b	a	b	h	b	a	a	b	b	h	b	a	b	a	a	a	b	a	a	b	b	b	a	b	b	a	a	b
OH02-16245	59.58	10.81	54.4	100.63	88.02	52.5	89.61	65.21	70.6	55.26	17.9	6	b	b	b	a	-	-	h	b	h	a	b	a	b	b	b	b	a	h	a	b	a	a	a	b	a	a	a	a	b	a	b	a	-	a	a	h	a
OH02-16246	58.27	10.12	53.38	99.33	91.54	52.17	82.98	62.68	70.74	48.1	18.1	3	b	-	b	a	a	a	b	b	-	a	b	-	-	a	b	b	b	b	-	a	b	-	a	b	b	-	a	-	b	b	a	a	b	a	-	h	a
OH02-16247	59.24	10.27	53.76	94.74	85.96	51.19	85.99	63.92	71.08	54.22	18	5	b	b	a	b	b	b	a	h	a	b	a	a	-	b	a	b	b	a	b	b	a	b	-	a	a	b	b	b	b	a	a	h	a	a	a	h	a
OH02-16248	57.4	10.97	53.51	93.15	79.34	51.4	83.57	63.93	71.78	50.95	18	3	b	b	b	b	b	h	b	h	a	b	a	a	b	b	a	b	h	h	b	a	b	a	a	b	a	b	b	b	b	a	b	h	a	b	a	h	b
OH02-16249	58.49	10.45	53.22	80.4	70.34	51.58	82.51	62.07	72.17	51.17	18.2	7	b	b	a	b	b	b	b	b	a	b	a	a	a	b	b	b	b	a	h	b	b	a	b	a	b	a	a	a	b	a	b	b	a	b	b	b	a
OH02-16250	58.54	9.88	54.85	94.9	88.84	53.04	88.61	66.47	70.34	53.32	17.7	3	b	b	a	b	-	a	b	a	b	b	a	b	a	a	a	h	b	b	a	b	b	b	b	a	b	a	b	a	b	a	b	a	a	h	a	a	h
OH02-16251	58.96	10.1	56.08	100.28	92.69	52.57	88.21	66.64	69.92	53.57	18.1	4	-	b	b	a	-	a	b	h	a	b	a	a	b	a	a	b	b	b	a	b	a	b	a	b	b	a	a	a	b	a	b	a	a	b	a	a	h
OH02-16252	58.21	10.07	53.51	92.88	85.39	50	81.83	61	73.7	50.59	18.3	6	-	b	b	b	a	a	a	a	a	b	a	b	a	b	b	b	a	h	a	a	a	a	a	b	a	a	b	b	b	b	b	a	b	b	a	a	b
OH02-16253	58.7	10.01	52.37	90.09	83.2	50.71	82.84	62.5	72.99	51.67	18.4	6	b	b	b	-	b	a	b	a	a	b	a	b	a	b	b	h	b	a	a	a	a	a	b	b	a	a	a	a	a	a	b	h	b	b	a	b	a
OH02-16254	56.36	9.29	56.6	101.89	99.77	52.42	88.96	67.36	69.69	57.11	17.8	5	b	b	b	a	b	a	a	a	a	b	a	b	a	b	a	h	b	b	a	a	a	a	b	b	b	a	b	b	h	a	b	a	h	b	b	a	b
OH02-16255	58.4	10.6	53.86	108.73	97.59	52.19	87.57	63.98	70.89	53.02	18.1	7	b	b	a	a	b	a	b	a	a	a	a	a	a	b	h	h	b	a	a	b	a	b	b	b	b	a	b	a	b	b	b	a	a	a	b	a	a
OH02-16256	57.78	9.84	55.08	79.82	73.94	51.33	85.99	64.55	71.31	55.12	17.9	4	b	b	b	a	b	a	a	b	a	a	b	a	b	a	b	b	h	a	b	a	b	a	a	a	b	a	b	b	b	a	a	b	b	a	b	b	a
OH02-16257	60.14	9.44	53.03	108.02	105.03	49.4	84.04	63.3	71.98	55.34	18.1	5	b	a	b	b	b	b	a	a	a	b	a	b	b	a	h	b	h	a	a	b	a	a	a	b	b	-	b	b	b	b	b	b	h	b	b	h	b
OH02-16258	58.49	10.15	59.98	106.93	98.78	54.46	97.3	71.55	67.96	60.04	17.7	4	-	b	a	a	b	a	h	b	b	b	b	a	a	b	b	b	h	b	b	b	a	b	a	b	b	b	b	b	b	a	b	b	a	h	-	b	b
OH02-16259	57.66	9.97	54.16	106.96	100.17	51.45	85.08	63.97	71.83	53.36	17.9	4	b	a	b	a	a	b	a	b	b	a	a	a	a	a	h	b	a	h	b	a	a	b	a	b	b	a	b	h	b	a	a	b	a	b	a	b	a
OH02-16261	57.72	9.72	54	81.92	77.07	50.25	83.71	63.16	71.05	53.2	18.4	8	b	b	a	a	a	a	b	h	b	b	b	b	a	h	b	a	a	a	-	a	a	a	b	a	b	b	a	b	a	a	a	b	b	b	a	b	b
OH02-16262	57.85	9.99	56.74	100.42	93.73	53.83	91.5	68.54	70.42	54.44	17.6	7	b	a	a	b	b	b	a	h	a	b	b	a	b	a	b	h	b	a	a	a	a	a	b	a	a	a	b	b	a	a	a	b	b	b	b	a	a
OH02-16263	56.52	9.97	53.48	104.93	98.15	50.66	84.53	63.54	71.26	55.79	18.3	3	a	a	a	a	b	a	a	a	b	a	a	b	a	b	a	b	a	b	-	b	b	b	a	h	a	-	b	b	b	a	a	a	a	a	b	h	a
OH02-16265	58.33	10.36	54	103.31	93.92	51	86.16	62.47	73.01	50.4	17.9	7	a	a	a	b	a	b	a	a	a	b	a	a	b	a	a	b	a	b	b	b	a	a	b	b	a	-	b	a	b	b	a	b	b	b	a	b	a
OH02-16266	59.5	9.52	54.25	112.48	108.93	50.78	88.11	63.74	71.62	54.52	18.2	5	a	a	b	a	a	a	b	a	b	b	a	a	a	b	h	b	b	a	a	b	a	b	a	b	a	-	b	a	b	b	b	b	b	b	a	a	b
OH02-16267	58.3	10.32	54.38	91.83	82.52	52.43	86.07	64.66	71.85	52.1	17.6	3	b	b	a	a	a	b	a	b	-	a	b	a	b	b	h	h	b	b	h	a	b	a	a	a	a	-	b	b	b	b	b	b	b	a	-	b	a
OH02-16268	56.83	10.75	54.46	107.01	94.94	51.93	86.79	64.09	70.82	53.41	17.8	4	b	b	b	a	a	a	-	h	a	a	a	a	a	h	a	b	b	a	b	b	a	b	b	a	b	b	b	b	b	a	b	b	a	a	a	a	h
OH02-16269	59.09	10.24	52.52	103.63	94.99	50.86	85.52	61.82	73.51	53.12	18.1	5	b	-	a	b	a	b	h	a	b	b	a	a	b	h	h	b	a	a	a	b	a	a	b	a	b	b	a	a	b	a	b	a	b	h	b	a	b
OH02-16270	58.18	10.89	53.84	95.46	82.27	50.45	83.36	60.95	72.2	48.23	17.9	5	a	b	b	b	a	b	h	h	a	b	a	a	a	-	a	b	a	-	b	b	b	a	a	a	a	b	b	b	b	b	-	a	a	b	b	a	b
OH02-16271	58.26	8.97	55	85.4	85.53	51.62	85.59	63.96	71.84	55.05	18.5	7	a	b	a	b	b	-	-	b	b	b	b	b	b	b	a	a	a	h	a	a	b	a	a	h	a	h	a	a	a	b	b	h	a	b	a	h	b
OH02-16272	58.51	9.49	53.21	97.97	94.44	50.35	82.94	61.42	71.65	52.03	18.1	6	a	b	b	a	h	b	h	a	a	a	a	a	b	a	a	b	b	h	b	b	b	a	b	h	a	b	b	b	b	b	a	h	a	a	b	h	a
OH02-16273	58.23	9.69	52.72	97.86	93.18	50.06	83.95	61.7	71.99	53.93	18.3	5	b	b	a	b	b	a	h	b	-	b	a	b	b	b	a	b	a	b	a	a	a	b	b	h	a	b	b	b	b	b	b	h	a	a	b	h	a
OH02-16274	57.85	10.49	54.91	81.45	70.93	51.78	84.62	63.52	71.86	50.38	18.2	8	a	h	b	b	b	b	a	b	a	b	b	b	b	b	b	b	a	a	a	b	b	b	b	a	a	a	b	b	b	a	b	a	h	b	a	h	b
OH02-16275	59.17	10.54	54.02	103.27	92.45	51.32	86.38	62.84	73.43	50.57	16.8	3	a	b	b	b	a	a	a	h	b	b	a	a	b	b	b	b	a	h	h	b	a	a	a	h	a	b	b	b	b	a	-	a	a	b	b	a	b
OH02-16276	58.13	10.22	53.65	117.64	109.27	51.4	87.71	63.32	70.32	53.94	17.9	3	b	a	b	a	a	b	b	h	h	b	a	a	b	b	a	b	b	b	a	a	a	b	b	b	a	-	b	a	b	a	b	a	a	b	b	-	b
OH02-16277	57.9	10.1	53.7	108.27	100.61	52.23	85.8	62.68	71.83	50.48	17.7	3	b	a	a	b	a	b	a	b	a	b	a	a	a	b	a	b	b	a	a	b	a	h	a	a	b	-	b	b	b	b	b	a	a	b	a	a	b
OH02-16278	58.38	9.87	53.2	94.32	88.21	50.1	81.62	60.55	74.27	49.62	18.6	8	a	b	b	a	a	b	a	b	a	b	a	a	-	a	a	b	a	a	b	b	b	a	b	b	a	-	b	b	b	a	b	a	a	b	b	a	b
OH02-16279	58.1	10.11	53.47	89.26	81.65	50.59	82.53	62.22	73.62	54.07	18.3	6	b	b	b	b	h	b	a	b	b	b	a	a	a	a	a	b	a	b	b	b	a	a	a	a	a	b	b	b	b	a	a	a	b	b	b	b	b
OH02-16281	58.36	10.44	53.55	100.08	89.9	50.97	86.08	62.38	72.79	52.67	18.5	5	b	b	b	a	h	b	b	a	b	b	a	b	b	b	a	h	b	a	a	a	a	a	b	a	a	a	a	a	h	a	b	h	b	h	a	b	a
OH02-16282	58.15	9.74	56.13	93.24	88.05	53.43	87.8	67.04	71.17	54.41	17.6	3	a	b	b	a	b	b	b	a	-	b	b	a	a	a	a	h	b	a	a	a	a	b	b	b	a	b	b	b	a	b	a	b	b	a	a	a	a
OH02-16283	57.81	10.42	54.83	90.36	80.53	51.54	86.19	64.28	71.69	55.73	18.1	4	b	b	b	a	h	b	b	b	h	a	b	b	b	b	b	h	a	b	a	a	b	a	b	a	b	b	b	b	b	a	a	h	b	a	a	h	b
OH02-16284	59.27	9.49	54.14	98.09	94.63	52.24	85.17	64.89	71.97	53.43	17.9	4	a	b	a	a	a	b	a	a	b	a	b	a	b	b	b	a	b	b	a	a	-	a	a	b	b	b	a	-	a	a	b	b	a	a	b	-	a
OH02-16285	57.16	9.89	53.15	96.33	90.2	49.99	83.24	62.73	71.66	57.09	18.3	6	a	b	h	a	b	a	a	b	a	b	b	b	b	a	a	b	h	b	a	b	b	b	a	-	b	a	b	b	b	a	a	h	b	a	a	b	a
OH02-16286	58.88	9.87	53.03	102.3	96.24	49.83	82.47	62.42	71.3	53.82	18.2	8	a	h	b	b	b	a	a	b	b	a	b	a	a	-	b	b	b	a	b	a	-	a	a	a	b	b	b	b	b	a	a	h	a	a	a	b	a
OH02-16287	57	9.81	52.77	101.24	95.59	50.78	83.65	62.72	71.74	53.73	17.9	5	a	h	a	b	b	b	a	b	a	a	a	a	a	a	b	a	a	b	a	a	b	h	a	a	b	b	a	b	a	b	b	a	a	a	a	a	a
OH02-16288	57.28	10.15	54.19	81.01	72.93	51.94	84.53	64.12	71.5	53.37	18.2	3	b	a	a	b	b	b	b	b	a	b	b	b	b	a	b	b	b	h	b	a	a	b	a	b	a	b	b	b	b	a	h	b	a	a	b	h	a
OH02-16289	58.33	10.11	53.08	96.88	89.24	50.28	84.58	62.79	71.66	55.83	18.6	6	a	b	a	b	h	a	b	h	a	b	a	a	b	b	a	b	a	b	b	a	a	b	b	a	a	b	b	a	b	a	a	a	b	h	b	-	b
OH02-16290	59	10.1	53.79	103.18	95.54	52.18	85.75	63.71	70.31	52.81	17.6	5	b	h	b	b	b	b	a	a	a	b	a	a	a	a	h	a	b	b	b	a	a	b	a	b	b	a	h	b	a	a	a	a	b	a	b	h	b
OH02-16291	59.53	10	52.77	96.87	89.8	51.53	82.3	61.2	74.1	47.93	.	.	a	b	b	a	a	h	a	a	a	b	a	b	a	b	a	b	a	a	a	a	a	b	b	a	b	b	h	a	b	b	h	a	b	b	a	h	a
OH02-16292	59.2	10.2	53.48	110.56	102.14	51.6	87.46	63.37	70.89	52	17.9	6	a	b	a	b	b	a	a	b	b	b	a	a	a	b	b	a	h	b	a	a	a	b	b	h	b	b	h	a	a	b	h	b	a	h	b	b	b
OH02-16293	57.82	10.17	53.37	94.25	86.15	51.83	84.06	64.61	70.75	53.45	17.8	6	a	b	b	a	h	a	a	a	a	-	a	b	b	b	a	b	b	a	a	a	a	a	a	-	a	b	b	a	b	b	b	b	b	a	a	a	a
OH02-16294	57.47	9.39	54.63	106.4	103.73	50.91	86.08	64.52	70.17	55	18.1	5	b	b	h	b	h	a	b	a	b	b	a	b	a	a	h	a	b	b	a	a	a	b	a	b	b	-	b	b	a	b	a	a	a	b	a	a	b
OH02-16295	58.91	9.85	55.41	96.98	91.15	52.61	87.09	66.7	70.63	53.68	17.8	7	b	h	b	b	b	b	a	b	b	a	a	b	a	b	a	a	a	b	b	a	b	a	b	b	b	b	a	b	a	a	a	a	b	a	a	a	a
OH02-16296	59.92	10.13	55.08	122.58	114.75	52.85	90.87	66.53	69.7	55.38	17.5	4	b	h	b	b	h	a	h	h	b	a	a	a	a	a	a	a	h	h	b	b	b	b	b	a	b	a	a	b	a	b	b	a	a	a	b	a	a
OH02-16297	58.75	10.3	55.53	101.47	92.26	52.85	85.78	65.48	71.85	49.39	17.5	4	a	h	b	a	a	a	-	h	a	b	a	a	a	b	a	b	b	b	a	b	b	b	a	a	a	b	b	a	b	b	h	a	a	b	b	a	b
OH02-16298	57.07	10.38	53.16	106.41	96.77	50.65	84.36	62.13	71.75	52.73	18.4	7	a	b	a	a	b	a	b	a	b	a	a	b	b	a	b	b	a	b	a	b	b	a	a	a	a	h	b	b	b	a	a	b	b	a	a	b	a
OH02-16299	58.79	9.6	54.83	105.67	101.52	52.55	89.32	66.9	70.56	54.88	17.7	4	b	-	a	a	h	b	b	h	a	a	a	a	b	b	-	a	b	a	a	a	a	b	b	b	b	a	a	b	a	a	a	a	b	a	b	b	a
OH02-16301	59.44	10.16	53	110.94	102.96	50.67	85.7	63.49	71.88	50.72	17.8	4	a	a	a	a	a	b	b	a	b	b	a	b	a	a	h	a	b	a	a	b	b	b	a	b	b	a	a	a	a	b	a	a	b	h	b	b	a
OH02-16302	56.95	9.66	54.22	97.99	93.53	50.61	84.57	64.14	71.48	57.42	18.1	4	a	b	a	a	h	a	a	b	b	b	a	a	b	b	a	b	a	a	h	b	b	b	a	b	a	b	b	a	b	b	b	b	a	h	b	h	b
OH02-16303	59.18	9.71	54.16	109.06	104.19	51.09	87.94	64.72	71.27	55.04	18	7	b	a	a	a	a	a	b	a	a	b	a	a	a	a	a	a	a	h	b	b	b	b	a	b	a	b	a	a	a	b	a	a	a	b	b	h	b
OH02-16304	59.01	10.07	53.22	94.03	86.77	51.55	84.27	63.04	72.09	51.46	18.1	7	b	b	b	a	a	a	a	h	b	b	a	a	a	b	b	b	b	b	b	a	a	b	a	b	b	-	b	b	b	b	b	a	a	b	b	h	b
OH02-16305	57.72	10.66	53.87	109.56	97.92	50.78	86.68	63.04	71.85	54.52	18.2	7	b	a	a	a	a	b	b	h	a	b	a	a	b	a	h	b	b	a	h	a	b	b	b	a	b	-	a	a	b	b	a	-	a	b	a	a	b
OH02-16306	58.92	10.02	54.53	98.69	91.61	49.75	85.21	63.34	71.89	55.97	18.3	6	a	b	a	b	b	b	b	b	b	-	a	a	b	a	-	b	h	b	h	b	b	a	b	a	a	b	a	b	b	b	-	a	a	b	b	a	b
OH02-16307	57.8	10.36	54.05	102.42	92.97	52.73	84.17	63.44	70.56	50.62	17.9	7	b	a	b	b	b	b	b	b	b	b	a	b	a	a	a	a	b	a	a	b	a	a	b	a	a	-	a	a	a	a	b	b	a	b	b	b	b
OH02-16308	57.28	10.32	54.58	77.49	68.29	52.63	84.19	64.3	71.6	53.4	18.2	7	a	a	b	b	b	b	a	b	a	a	a	a	a	a	b	h	b	a	a	b	a	a	b	a	a	a	b	a	b	b	b	b	a	a	b	b	a
OH02-16309	57.23	10.03	55.28	99.42	92.33	52.97	86.54	64.64	70.71	54.54	17.9	7	a	b	b	b	h	a	a	a	b	a	a	a	b	a	a	b	b	b	a	b	a	a	b	a	a	b	b	b	b	b	b	-	a	a	b	a	a
OH02-16310	57.86	9.97	56.86	94.88	88.09	53.5	89.61	69.23	69.66	54.99	17.5	5	a	a	b	b	a	a	a	b	a	a	b	b	a	a	h	-	a	a	a	a	a	a	a	b	b	a	a	-	a	b	h	-	h	a	a	a	a
OH02-16311	57.8	10.33	53.71	92.79	83.4	51.92	87.26	65.3	71.06	54.17	17.8	5	a	b	b	a	a	b	b	a	b	b	a	a	a	a	b	b	a	b	h	b	a	b	a	b	b	a	b	-	b	a	b	b	b	b	a	h	b
OH02-16312	58.27	9.33	52.4	103.13	100.83	48.63	81.57	60.93	72.9	56.17	.	.	a	b	b	b	h	b	b	a	a	b	a	a	b	b	h	b	h	h	b	a	b	b	a	b	a	b	a	-	b	b	h	b	a	h	b	h	b
OH02-16313	58.46	9.54	52.83	109.03	105.16	49.75	84.02	61.59	70.31	57.03	18.4	7	-	-	a	b	h	a	b	a	b	b	a	b	b	b	a	b	b	b	a	a	b	a	a	a	a	b	h	-	b	a	a	a	b	b	a	a	a
OH02-16314	59.48	9.96	56.21	86.05	79.46	52.21	86.67	66.02	70.6	54.47	17.7	3	a	h	h	a	h	b	a	b	a	b	a	b	a	a	b	b	h	b	a	a	b	a	b	b	h	a	a	-	b	a	h	b	a	h	b	b	a
OH02-16315	59.02	9.85	55.51	78.78	72.92	52.74	85.83	66.42	71.82	54.79	18.2	5	b	b	b	a	a	b	a	b	b	a	b	b	b	b	b	b	h	a	a	b	b	-	a	a	a	a	a	-	b	a	h	a	a	h	b	b	a
OH02-16316	57.22	9.78	55.67	101.39	95.92	52.55	88.18	65.57	69.31	54.44	17.7	5	a	h	b	b	h	a	b	a	a	b	a	a	a	a	h	b	h	b	a	a	b	b	a	a	b	b	b	-	b	a	b	a	a	a	a	a	b
OH02-16317	58.05	9.54	56.62	92.87	89.07	53.07	90.63	68.71	69.46	56.85	17.5	2	b	b	b	a	b	b	a	b	b	b	b	a	a	b	b	a	b	h	h	a	b	b	b	b	a	b	b	-	a	b	b	a	a	a	h	a	b
OH02-16318	59.16	10.07	54.78	102.97	95.57	53.27	87.32	66.41	71.17	53.05	17.8	3	b	b	b	a	a	a	b	a	a	b	a	-	a	a	a	h	b	h	b	b	b	a	a	a	a	a	a	-	b	h	b	b	a	h	b	b	h
[truncated: 52 more columns]

## Sheet: transpose
xgwm99	b	b	b	b	b	b	a	a	a	b	b	b	b	b	b	a	b	a	a	b	b	a	a	b	b	a	a	a	a	a	b	a	b	b	a	a	a	a	a	a	a	b	b	a	a	a	a	a	a
barc263	b	b	a	b	b	b	b	a	a	a	b	a	b	-	a	b	a	b	b	b	a	b	b	b	a	h	a	b	b	b	b	b	b	a	b	b	b	b	b	b	a	b	b	a	b	a	b	b	b
xgwm213	a	b	b	b	a	b	b	b	b	b	b	b	b	a	b	b	b	b	b	b	b	b	a	b	b	b	a	b	a	b	b	a	a	b	b	b	h	a	b	b	b	h	h	h	a	a	a	a	b
barc120	b	b	a	a	a	a	a	a	b	b	b	b	b	a	b	b	b	a	b	b	b	b	b	a	b	b	b	a	b	a	b	a	b	b	b	a	b	a	b	a	a	b	b	a	b	a	a	a	b
xgwm268	a	a	b	b	a	-	b	b	a	b	a	h	a	b	b	b	a	b	b	a	a	b	b	a	b	a	h	b	h	a	a	a	b	a	a	b	b	h	a	h	h	h	b	b	a	b	b	b	a
barc81	b	a	a	b	b	a	b	b	b	b	a	a	a	a	b	a	b	a	a	a	b	b	b	b	b	a	a	b	a	b	a	b	a	a	b	a	b	b	a	b	b	a	a	a	b	b	a	b	h
barc137	b	h	a	h	h	h	b	a	h	a	h	a	h	a	a	a	a	a	b	a	a	a	a	a	b	b	b	a	b	a	a	a	h	h	b	a	b	b	b	a	b	b	b	a	a	a	a	a	b
barc181	a	h	a	a	h	h	h	h	a	b	a	h	a	a	a	a	a	a	b	a	a	b	b	a	a	a	a	b	a	a	b	a	h	a	a	b	b	h	h	h	a	a	a	b	a	a	b	a	b
wmc44	a	a	b	b	b	b	a	h	b	b	a	a	a	b	a	b	a	a	b	b	b	b	b	a	h	b	a	a	b	b	b	a	b	a	a	b	b	a	b	a	b	a	b	a	b	b	b	a	a
xgwm264	-	a	b	a	a	b	b	a	a	a	b	b	b	b	b	a	b	a	b	a	b	b	b	b	b	a	a	a	h	a	a	a	b	b	b	b	a	a	b	h	b	b	a	a	b	b	b	a	b
xgwm273	a	a	a	a	a	a	a	a	a	b	a	a	a	a	a	a	a	a	b	a	a	b	b	a	a	a	a	a	a	a	a	a	a	a	a	b	a	a	a	a	a	a	a	a	a	a	b	b	b
xgwm337	b	b	a	a	b	a	b	b	b	b	b	b	b	b	a	a	b	a	a	a	a	b	a	a	h	b	a	b	a	h	a	b	a	b	a	a	b	a	b	b	b	a	b	b	b	b	a	b	b
barc271	b	a	a	b	b	b	b	b	a	b	b	-	b	a	h	a	-	a	a	b	b	a	-	b	-	b	b	a	b	a	b	b	b	a	b	b	a	b	b	b	a	a	-	-	a	b	b	a	b
xgwm232	a	a	b	a	a	b	b	b	b	a	b	a	a	a	b	b	b	a	b	a	b	b	b	b	b	a	b	b	b	a	a	a	b	a	b	b	a	a	b	b	a	a	a	a	a	a	a	-	a
barc119	h	a	b	-	h	b	b	h	h	b	h	b	a	b	h	h	h	-	a	h	h	b	a	h	h	b	a	b	b	b	b	a	h	h	a	b	b	b	b	b	b	b	b	b	b	b	b	a	b
xgwm312	b	b	-	b	h	h	a	a	b	b	h	h	b	b	a	b	b	b	b	b	b	b	b	b	b	h	h	h	h	b	a	a	h	a	b	b	h	b	b	a	b	-	b	b	b	b	b	b	a
wmc24	a	b	b	b	-	a	h	a	a	a	a	a	b	b	a	h	a	a	b	b	b	b	h	h	b	b	a	b	a	a	b	b	b	a	b	h	b	a	b	h	a	a	b	h	b	a	b	a	h
wms1053	a	a	a	b	a	b	a	b	b	b	a	a	b	a	b	b	a	b	a	a	a	b	b	b	b	b	a	b	b	b	a	h	a	a	a	b	a	a	b	a	b	h	b	a	a	a	a	a	a
xgwm328	a	a	a	b	b	a	a	a	a	b	b	b	b	b	b	a	a	b	a	b	b	a	a	a	b	a	b	a	b	a	b	a	b	a	a	b	b	b	b	a	a	a	a	a	b	a	a	a	a
xgwm311	a	b	b	b	a	b	a	a	a	b	b	b	a	b	a	b	b	b	b	a	a	h	a	a	b	b	a	b	b	a	h	b	a	a	b	b	a	h	a	b	b	b	a	a	b	a	a	a	a
xgwm372	a	a	b	a	a	a	a	a	b	a	a	a	b	b	a	b	b	a	b	h	b	b	a	a	a	b	b	a	h	h	b	a	b	b	a	a	a	b	a	a	a	b	a	b	a	a	a	a	b
xgwm636	b	b	b	a	b	b	b	b	a	a	b	b	b	a	a	a	b	a	b	b	b	b	a	a	b	a	a	b	a	b	a	a	b	b	b	b	b	b	b	b	a	a	a	a	b	a	a	a	a
xgwm257	b	b	b	a	a	a	a	a	a	a	b	b	a	a	a	a	b	b	b	a	b	b	b	a	a	a	b	b	b	b	a	a	b	b	h	b	h	b	b	b	b	a	a	a	b	b	b	b	a
xgwm501	b	b	a	a	a	b	b	b	b	a	a	b	b	b	b	b	b	a	a	a	b	b	a	a	a	a	b	a	b	b	a	a	a	b	a	a	a	a	a	a	b	b	h	a	a	a	b	b	a
barc55	b	h	b	b	a	a	b	b	b	a	a	b	b	a	a	b	b	b	h	a	b	b	a	a	a	a	a	b	-	b	b	a	b	b	a	a	a	a	a	a	a	a	b	a	b	a	a	a	a
barc200	b	h	b	b	b	-	b	h	b	b	b	b	a	h	h	b	h	b	b	b	b	a	b	b	a	b	b	a	b	a	b	b	a	h	b	b	a	b	h	h	h	h	h	b	b	b	b	b	b
wmc154	a	a	b	b	a	b	b	b	b	b	b	h	a	b	h	b	a	b	b	h	a	-	b	h	b	b	b	a	b	a	b	b	h	a	h	h	a	h	h	b	a	a	a	b	a	a	b	a	a
xgwm526	a	b	b	a	a	b	a	b	a	a	b	a	b	a	b	b	b	a	b	b	b	a	b	a	b	a	b	b	a	b	a	a	a	b	a	a	a	a	a	a	b	b	a	b	b	b	a	b	a
xgwm261	a	b	b	a	a	b	b	b	b	a	b	b	a	a	b	b	a	b	b	b	b	b	a	b	b	b	a	h	b	b	b	-	b	b	b	b	a	b	a	a	b	b	a	b	a	a	a	a	a
barc12	a	h	h	a	a	a	h	b	a	b	a	h	b	a	b	a	a	a	a	a	a	a	b	b	b	b	a	a	h	a	a	a	a	a	a	b	a	-	b	a	b	b	a	h	a	b	b	b	a
xgwm30	a	b	b	a	a	a	b	b	a	a	a	b	b	a	a	b	-	b	h	h	a	a	b	a	b	a	b	a	b	a	a	-	h	b	a	h	a	a	a	a	b	h	h	h	b	a	a	a	b
xgwm77	a	a	h	a	a	b	a	a	a	a	b	h	b	b	h	a	h	a	b	h	h	b	b	b	b	a	a	a	h	a	a	a	b	a	b	a	h	a	a	h	h	b	a	a	a	b	a	a	h
barc77	b	a	b	b	a	b	-	b	b	a	b	b	b	b	b	a	a	a	h	a	a	a	h	h	b	a	a	h	b	-	a	a	a	b	a	a	a	b	b	b	b	-	b	b	b	-	a	b	b
barc147	a	b	b	b	h	h	a	h	h	b	b	h	a	b	h	b	b	b	a	a	a	a	b	a	b	a	b	h	b	b	a	h	h	b	h	b	a	a	b	a	a	h	b	h	h	h	b	-	a
xgwm131	a	a	a	a	b	a	a	b	a	a	a	b	b	b	a	a	b	b	b	a	a	b	b	b	a	a	b	b	b	b	b	a	b	b	b	a	b	a	a	b	b	b	a	a	a	b	a	a	b
xgwm003	a	a	a	a	a	b	a	a	b	b	a	b	b	a	a	b	b	b	a	b	b	a	a	b	b	b	b	b	b	b	b	a	a	b	a	b	b	b	a	a	b	a	b	b	a	a	b	a	a
xgwm160	a	a	b	b	a	a	b	a	a	b	-	b	a	a	a	h	h	a	a	a	-	a	a	b	b	b	b	a	a	b	a	a	b	b	-	a	b	b	a	a	a	b	b	b	b	b	b	-	a
barc343	b	a	b	a	b	a	b	a	b	b	b	b	a	a	a	a	b	a	a	b	a	a	b	a	a	a	b	a	a	a	b	a	a	a	b	b	a	a	a	a	b	a	b	a	a	a	h	a	a
barc78	a	a	b	b	a	a	h	h	b	a	b	a	b	b	b	h	h	a	h	a	a	a	h	b	b	b	h	a	a	b	a	a	b	a	b	b	b	h	a	b	a	h	a	b	a	b	b	h	a
xgwm194	b	b	b	b	b	b	b	b	b	a	a	a	b	a	a	a	b	a	a	h	b	b	b	a	a	a	a	b	a	a	a	b	a	a	a	a	a	b	b	b	b	b	b	a	a	b	a	b	a
xgwm126	a	a	a	b	b	b	b	b	-	b	b	b	b	a	a	a	a	b	a	a	b	b	b	a	a	a	b	b	b	a	b	a	b	a	a	b	b	a	a	b	b	b	b	a	a	b	a	a	a
barc122	b	b	a	a	a	b	a	a	b	b	a	a	h	b	b	a	a	a	a	b	b	b	b	b	b	b	-	b	b	b	b	b	a	a	b	b	a	b	a	b	a	a	a	b	b	b	b	b	b
barc316	a	b	b	b	a	b	b	a	b	b	b	b	a	b	a	b	a	b	a	b	a	-	a	a	b	b	a	a	a	a	a	b	b	b	a	a	a	b	a	a	a	b	a	a	a	b	b	a	b
barc141	b	a	h	a	b	b	a	h	a	b	a	a	b	a	h	h	a	h	b	a	h	h	a	a	b	a	b	-	a	h	b	a	h	a	a	a	b	b	h	a	a	a	a	b	b	a	a	b	b
xgwm304	a	a	b	a	b	a	a	a	b	a	a	b	b	b	a	b	b	b	b	b	b	b	a	b	b	a	b	a	b	a	b	a	b	a	a	a	-	b	b	a	-	-	b	b	a	a	b	b	a
xgwm335	a	b	b	b	a	b	b	b	b	a	a	a	a	b	a	h	h	b	b	a	a	a	a	b	b	b	a	b	b	b	b	a	h	b	b	b	a	a	b	b	b	a	b	b	a	a	a	a	b
barc59	a	b	b	-	a	a	b	b	a	b	a	b	h	a	b	b	h	b	a	h	h	b	a	a	b	b	a	b	a	b	b	a	a	b	a	b	a	b	a	b	a	h	h	a	a	a	b	b	b
barc232	b	a	a	a	b	b	b	b	a	a	b	b	b	a	b	a	a	b	b	b	a	a	a	a	b	a	a	a	b	b	b	b	a	a	a	a	a	b	a	a	a	b	a	b	-	a	a	a	a
barc243	-	b	b	a	a	b	b	a	b	b	b	a	b	b	b	a	b	b	a	a	b	a	-	a	a	a	a	b	b	b	b	-	b	b	a	b	a	b	b	a	b	a	b	b	b	a	a	-	b
barc142	b	a	a	a	b	b	a	b	b	h	a	a	b	a	b	a	h	b	a	a	b	b	b	b	a	a	a	b	a	b	a	a	a	a	b	a	a	a	b	a	a	b	h	a	a	a	a	b	a
barc004	a	b	h	a	h	b	a	b	a	h	h	h	a	b	a	a	b	a	a	a	b	b	a	h	h	b	a	b	a	a	h	a	a	a	a	h	a	a	b	h	b	b	b	a	b	h	a	a	b
xgm174	a	b	b	a	a	b	b	a	b	b	b	b	a	b	b	b	a	a	a	b	a	b	a	a	b	b	-	b	b	a	b	a	b	b	a	b	a	b	b	a	b	b	b	b	a	b	b	a	b
barc177	b	a	b	a	b	b	a	a	a	b	h	h	a	a	b	b	b	a	a	a	a	b	b	b	a	a	h	h	h	h	b	b	a	a	b	h	a	b	h	h	b	b	b	b	b	b	a	h	b
barc110	b	a	b	a	a	b	b	b	b	b	b	b	b	a	b	b	b	b	b	a	a	b	b	b	a	a	a	b	h	b	b	b	a	a	b	b	a	h	b	b	b	b	b	b	b	a	b	a	b
wms1039	a	a	b	a	a	a	b	b	b	a	a	a	a	b	a	b	a	a	a	a	a	a	a	b	b	b	a	b	b	b	a	a	a	b	b	b	b	a	a	b	a	a	a	b	a	b	b	a	b
barc286	a	b	b	a	a	a	b	a	b	a	b	h	h	b	b	b	a	a	a	h	a	b	b	h	b	a	a	h	a	b	a	a	b	b	a	a	a	b	b	a	a	a	a	b	a	-	b	a	a
xgwm190	b	a	a	b	a	h	b	b	h	a	a	-	a	b	a	a	b	a	b	a	a	a	a	b	b	b	b	a	a	a	b	-	b	b	b	a	a	b	b	a	h	a	a	a	a	a	a	b	a
xgwm192	b	b	a	b	a	a	a	a	a	b	h	a	a	a	b	b	b	b	b	b	a	a	a	b	b	b	a	a	b	b	b	b	a	a	a	a	a	b	b	b	b	a	a	a	a	b	a	b	b
xgwm334	b	a	a	b	b	a	b	b	b	a	a	a	b	-	a	b	a	a	a	a	b	b	a	a	a	a	h	a	h	a	b	b	a	b	a	b	a	a	b	b	b	a	a	a	b	b	a	a	b
barc107	h	b	a	a	h	b	a	a	b	h	h	-	h	b	b	a	a	b	a	a	a	a	a	b	b	b	b	a	b	a	a	a	b	b	b	a	b	b	b	b	a	a	b	b	a	a	b	b	b
xgwm617	b	a	a	b	b	b	a	b	b	a	b	b	b	a	b	b	a	b	h	b	b	b	b	a	b	b	a	b	b	a	a	a	a	b	b	a	a	a	b	b	b	b	a	a	b	b	a	a	a
barc24	a	b	b	h	a	a	b	b	-	b	a	-	b	a	b	a	a	h	a	a	a	a	b	b	b	b	a	a	a	a	a	a	a	a	a	b	b	b	b	a	b	b	a	h	a	b	b	b	a
barc198	b	b	a	b	b	b	a	b	a	b	a	a	b	b	b	b	b	b	a	b	a	a	-	a	-	b	-	b	-	b	b	b	b	b	-	b	b	b	a	-	b	a	a	b	a	a	b	b	a
wmc105	b	b	a	b	h	a	a	a	b	b	a	a	b	b	b	b	a	b	b	b	b	a	a	b	h	h	b	b	b	b	b	a	b	b	a	b	b	b	a	b	a	a	a	b	a	b	a	a	a
barc134	b	a	h	b	b	b	a	b	b	a	a	b	b	b	b	b	b	h	h	h	b	b	a	b	b	b	h	b	a	a	a	b	b	b	h	a	b	a	b	a	h	b	b	b	a	a	a	b	a
barc123	a	b	b	b	b	b	-	b	a	b	b	b	a	a	b	a	a	b	b	b	a	a	-	a	b	b	b	a	b	a	a	a	a	b	a	a	b	b	b	a	b	b	b	b	a	a	a	a	b
xgwm282	a	a	a	a	a	b	a	b	b	b	b	a	b	b	b	b	a	b	a	a	a	a	b	b	b	b	b	a	b	a	b	b	a	a	a	b	b	b	b	b	a	a	b	b	a	a	b	b	b
xgwm332	a	b	a	b	b	a	a	b	b	a	a	a	-	a	b	a	a	a	-	a	b	a	b	b	b	a	b	a	b	b	b	b	a	a	b	b	h	a	b	b	a	a	a	a	b	b	a	a	b
barc108	a	b	b	a	b	a	b	b	-	a	a	a	a	b	a	b	a	a	a	a	a	a	b	a	a	a	b	b	a	a	h	a	a	a	a	h	a	b	h	b	a	b	b	b	h	b	a	a	a
barc222	a	a	b	a	a	a	b	b	b	a	a	b	a	b	b	b	h	b	a	b	b	a	b	a	h	a	b	b	h	a	a	a	b	b	a	b	a	b	h	a	a	b	b	b	a	b	b	a	b
barc127	b	b	a	a	b	b	b	a	b	a	a	a	b	a	a	b	a	a	a	a	a	b	b	a	b	a	b	a	b	b	b	b	a	b	b	a	b	a	b	b	a	a	h	a	b	b	a	a	b
xgwm130	b	a	a	a	h	a	h	h	a	a	b	a	-	b	h	a	b	a	a	a	b	b	a	b	h	b	b	-	h	b	b	b	h	a	a	a	a	b	a	a	b	a	b	h	h	a	a	b	b
xgwm68	b	b	a	b	b	a	a	b	b	b	h	a	h	h	h	b	a	b	a	b	a	a	b	b	b	a	a	b	b	a	b	b	b	a	b	b	b	a	b	b	a	a	b	a	a	a	b	b	b
xgwm297	a	a	b	b	a	b	b	b	b	b	b	a	b	a	b	b	b	b	b	a	a	a	b	b	a	b	b	b	b	b	a	b	a	b	b	b	a	b	b	a	a	a	b	b	b	b	b	a	a
barc50	a	a	a	a	a	a	h	b	b	b	h	h	h	b	h	a	a	b	a	b	a	a	a	a	a	b	a	b	a	a	a	b	b	a	b	b	b	h	a	a	-	a	a	a	a	a	a	a	a
xgwm295	a	b	b	a	a	a	b	a	b	a	a	a	b	b	b	a	-	b	b	a	b	b	b	b	b	b	a	b	b	b	a	a	b	a	b	a	a	a	b	b	a	b	-	b	b	a	b	a	-
xgwm437	b	a	a	a	b	b	b	a	a	a	h	a	b	b	a	a	b	-	b	a	a	a	a	a	a	b	a	a	b	b	-	b	b	a	a	a	b	a	a	b	a	b	b	a	b	a	b	a	b
barc76	a	b	a	a	h	a	a	a	a	a	b	b	b	b	b	b	b	a	a	h	a	a	a	b	a	a	a	b	b	b	b	a	b	b	a	a	a	b	a	a	b	b	b	b	a	a	a	h	a
barc121	a	b	b	a	a	a	a	b	a	-	h	b	a	b	a	b	a	a	a	a	a	a	b	a	a	a	b	b	a	a	b	a	a	b	-	-	a	b	b	b	b	b	b	-	b	b	a	b	a
barc67	a	b	a	a	a	b	a	a	a	b	a	b	b	a	a	b	a	a	-	b	a	-	a	b	a	a	a	-	b	a	a	a	h	a	-	b	b	a	b	b	h	a	a	h	a	b	b	a	b
barc100	b	a	b	h	b	b	a	b	b	a	a	b	a	a	a	a	a	b	b	b	b	b	b	b	b	b	a	a	a	a	b	b	b	a	b	b	b	b	b	a	a	a	a	a	b	b	b	a	a
barc176	h	a	a	a	a	a	a	a	a	a	a	a	b	a	h	a	a	a	a	a	b	h	a	b	h	a	a	a	h	a	a	b	a	a	-	b	b	a	b	a	a	a	a	a	a	a	a	a	a
barc197	b	a	b	h	b	b	h	b	b	b	a	-	a	b	h	h	a	h	b	a	h	b	h	h	b	h	b	b	a	h	b	b	b	a	a	a	b	b	b	-	a	b	a	b	b	a	a	b	b
wms736	h	a	b	a	a	a	a	h	h	a	b	a	a	a	a	h	b	a	b	h	h	b	a	b	b	b	a	a	h	h	h	b	a	a	-	a	a	b	b	a	a	a	h	b	b	a	b	-	a
wms940	b	b	a	b	b	a	a	a	a	b	a	a	a	a	b	a	b	b	a	h	h	a	a	a	a	a	b	a	a	b	a	h	b	b	a	h	h	h	a	a	h	a	a	h	a	a	h	h	a
cfd79	a	a	a	a	b	b	b	b	a	a	b	a	b	a	a	a	b	a	b	b	b	b	a	b	b	b	a	b	b	a	b	b	b	-	b	b	b	b	a	b	b	b	b	b	b	a	b	b	b
cfd2134	b	b	a	b	a	a	a	b	a	b	a	b	b	b	b	b	b	b	a	b	a	a	a	a	b	b	b	a	b	a	b	a	b	b	a	a	a	a	b	a	b	b	b	b	a	a	b	a	b
wmc78	a	a	h	a	a	b	h	b	a	a	b	b	b	h	h	a	h	a	b	h	b	b	h	b	a	a	a	a	a	a	a	a	b	b	b	b	a	a	a	h	h	b	a	a	a	b	b	a	h
xgwm47.2A	b	b	b	b	b	b	b	a	-	b	b	b	a	h	h	a	a	b	b	b	b	a	b	h	b	b	b	a	b	a	b	b	h	h	b	b	b	b	b	b	a	a	a	b	b	b	b	b	b
xgwm319.2B	b	b	b	b	b	b	b	a	a	b	b	b	a	b	b	a	a	b	b	b	b	a	.	b	b	b	b	a	b	a	b	b	b	b	b	b	b	b	b	b	a	a	h	b	b	b	b	b	b
[truncated: 98 more columns]

## Sheet: VA2genotype
NAME	xgwm99.1A	barc263.1A	xgwm213.1A	barc120.1A	xgwm268.1B	barc81.1B	barc137.1B	barc181.1B	wmc44.1B	xgwm264.1B	xgwm273.1B	xgwm337.1D	barc271.1D	xgwm232.1D	barc119.1D	xgwm47.2A	xgwm312.2A	wmc24.2A	wms1053.2A	xgwm328.2A	xgwm311.2A	xgwm372.2A	xgwm636.2A	xgwm257.2B	xgwm501.2B	barc55.2B	barc200.2B	wmc154.2B	xgwm319.2B	xgwm526.2B	xgwm261.2D	barc12.3A	xgwm30.3D	xgwm77.3B	barc77.3B	barc147.3B	wmc78.3B	xgwm131.3B	cfd79.3B/3D	xgwm003.3D	xgwm160.4A	barc343.4A	barc78.4A	xgwm194.4D	xgwm126.5A	barc122.5A	barc316.5A	barc141.5A	xgwm304.5A
OH02-16161	b	b	a	b	a	b	b	a	a	-	a	b	b	a	h	b	b	a	a	a	a	a	b	b	b	b	b	a	b	a	a	a	a	a	b	a	a	a	a	a	a	b	a	b	a	b	a	b	a
OH02-16162	b	b	b	b	a	a	h	h	a	a	a	b	a	a	a	b	b	b	a	a	b	a	b	b	b	h	h	a	b	b	b	h	b	a	a	b	a	a	a	a	a	a	a	b	a	b	b	a	a
OH02-16163	b	a	b	a	b	a	a	a	b	b	a	a	a	b	b	b	-	b	a	a	b	b	b	b	a	b	b	b	b	b	b	h	b	h	b	b	h	a	a	a	b	b	b	b	a	a	b	h	b
OH02-16164	b	b	b	a	b	b	h	a	b	a	a	a	b	a	-	b	b	b	b	b	b	a	a	a	a	b	b	b	b	a	a	a	a	a	b	b	a	a	a	a	b	a	b	b	b	a	b	a	a
OH02-16165	b	b	a	a	a	b	h	h	b	a	a	b	b	a	h	b	h	-	a	b	a	a	b	a	a	a	b	a	b	a	a	a	a	a	a	h	a	b	b	a	a	b	a	b	b	a	a	b	b
OH02-16166	b	b	b	a	-	a	h	h	b	b	a	a	b	b	b	b	h	a	b	a	b	a	b	a	b	a	-	b	b	b	b	a	a	b	b	h	b	a	b	b	a	a	a	b	b	b	b	b	a
OH02-16167	a	b	b	a	b	b	b	h	a	b	a	b	b	b	b	b	a	h	a	a	a	a	b	a	b	b	b	b	b	a	b	h	b	a	-	a	h	a	b	a	b	b	h	b	b	a	b	a	a
OH02-16168	a	a	b	a	b	b	a	h	h	a	a	b	b	b	h	a	a	a	b	a	a	a	b	a	b	b	h	b	a	b	b	b	b	a	b	h	b	b	b	a	a	a	h	b	b	a	a	h	a
OH02-16169	a	a	b	b	a	b	h	a	b	a	a	b	a	b	h	-	b	a	b	a	a	b	a	a	b	b	b	b	a	a	b	a	a	a	b	h	a	a	a	b	a	b	b	b	-	b	b	a	b
OH02-16170	b	a	b	b	b	b	a	b	b	a	b	b	b	a	b	b	b	a	b	b	b	a	a	a	a	a	b	b	b	a	a	b	a	a	a	b	a	a	a	b	b	b	a	a	b	b	b	b	a
OH02-16171	b	b	b	b	a	a	h	a	a	b	a	b	b	b	h	b	h	a	a	b	b	a	b	b	a	a	b	b	b	b	b	a	a	b	b	b	b	a	b	a	-	b	b	a	b	a	b	a	a
OH02-16172	b	a	b	b	h	a	a	h	a	b	a	b	-	a	b	b	h	a	a	b	b	a	b	b	b	b	b	h	b	a	b	h	b	h	b	h	b	b	a	b	b	b	a	a	b	a	b	a	b
OH02-16173	b	b	b	b	a	a	h	a	a	b	a	b	b	a	a	a	b	b	b	b	a	b	b	a	b	b	a	a	a	b	a	b	b	b	b	a	b	b	b	b	a	a	b	b	b	h	a	b	b
OH02-16174	b	-	a	a	b	a	a	a	b	b	a	b	a	a	b	h	b	b	a	b	b	b	a	a	b	a	h	b	b	a	a	a	a	b	b	b	h	b	a	a	a	a	b	a	a	b	b	a	b
OH02-16175	b	a	b	b	b	b	a	a	a	b	a	a	h	b	h	h	a	a	b	b	a	a	a	a	b	a	h	h	b	b	b	b	a	h	b	h	h	a	a	a	a	a	b	a	a	b	a	h	a
OH02-16176	a	b	b	b	b	a	a	a	b	a	a	a	a	b	h	a	b	h	b	a	b	b	a	a	b	b	b	b	a	b	b	a	b	a	a	b	a	a	a	b	h	a	h	a	a	a	b	h	b
OH02-16177	b	a	b	b	a	b	a	a	a	b	a	b	-	b	h	a	b	a	a	a	b	b	b	b	b	b	h	a	a	b	a	a	-	h	a	b	h	b	b	b	h	b	h	b	a	a	a	a	b
OH02-16178	a	b	b	a	b	a	a	a	a	a	a	a	a	a	-	b	b	a	b	b	b	a	a	b	a	b	b	b	b	a	b	a	b	a	a	b	a	b	a	b	a	a	a	a	b	a	b	h	b
OH02-16179	a	b	b	b	b	a	b	b	b	b	b	a	a	b	a	b	b	b	a	a	b	b	b	b	a	h	b	b	b	b	b	a	h	b	h	a	b	b	b	a	a	a	h	a	a	a	a	b	b
OH02-16181	b	b	b	b	a	a	a	a	b	a	a	a	b	a	h	b	b	b	a	b	a	h	b	a	a	a	b	h	b	b	b	a	h	h	a	a	h	a	b	b	a	b	a	h	a	b	b	a	b
OH02-16182	b	a	b	b	a	b	a	a	b	b	a	a	b	b	h	b	b	b	a	b	a	b	b	b	b	b	b	a	b	b	b	a	a	h	a	a	b	a	b	b	-	a	a	b	b	b	a	h	b
OH02-16183	a	b	b	b	b	b	a	b	b	b	b	b	a	b	b	a	b	b	b	a	h	b	b	b	b	b	a	-	a	a	b	a	a	b	a	a	b	b	b	a	a	a	a	b	b	b	-	h	b
OH02-16184	a	b	a	b	b	b	a	b	b	b	b	a	-	b	a	b	b	h	b	a	a	a	a	b	a	a	b	b	.	b	a	b	b	b	h	b	h	b	a	a	a	b	h	b	b	b	a	a	a
OH02-16185	b	b	b	a	a	b	a	a	a	b	a	a	b	b	h	h	b	h	b	a	a	a	a	a	a	a	b	h	b	a	b	b	a	b	h	a	b	b	b	b	b	a	b	a	a	b	a	a	b
OH02-16186	b	a	b	b	b	b	b	a	h	b	a	h	-	b	h	b	b	b	b	b	b	a	b	a	a	a	a	b	b	b	b	b	b	b	b	b	a	a	b	b	b	a	b	a	a	b	b	b	b
OH02-16187	a	h	b	b	a	a	b	a	b	a	a	b	b	a	b	b	h	b	b	a	b	b	a	a	a	a	b	b	b	a	b	b	a	a	a	a	a	a	b	b	b	a	b	a	a	b	b	a	a
OH02-16188	a	a	a	b	h	a	b	a	a	a	a	a	b	b	a	b	h	a	a	b	a	b	a	b	b	a	b	b	b	b	a	a	b	a	a	b	a	b	a	b	b	b	h	a	b	-	a	b	b
OH02-16189	a	b	b	a	b	b	a	b	a	a	a	b	a	b	b	a	h	b	b	a	b	a	b	b	a	b	a	a	a	b	h	a	a	a	h	h	a	b	b	b	a	a	a	b	b	b	a	-	a
OH02-16191	a	b	a	b	h	a	b	a	b	h	a	a	b	b	b	b	h	a	b	b	b	h	a	b	b	-	b	b	b	a	b	h	b	h	b	b	a	b	b	b	a	a	a	a	b	b	a	a	b
OH02-16192	a	b	b	a	a	b	a	a	b	a	a	h	a	a	b	a	b	a	b	a	a	h	b	b	b	b	a	a	a	b	b	a	a	a	-	b	a	b	a	b	b	a	b	a	a	b	a	h	a
OH02-16193	b	b	b	b	a	a	a	b	b	a	a	a	b	a	b	b	a	b	a	b	h	b	a	a	a	b	b	b	b	a	b	a	a	a	a	a	a	b	b	b	a	b	a	a	b	b	a	b	b
OH02-16194	a	b	a	a	a	b	a	a	a	a	a	b	b	a	a	b	a	b	h	a	b	a	a	a	a	a	b	b	b	a	-	a	-	a	a	h	a	a	b	a	a	a	a	b	a	b	b	a	a
OH02-16195	b	b	a	b	b	a	h	h	b	b	a	a	b	b	h	h	h	b	a	b	a	b	b	b	a	b	a	h	b	a	b	a	h	b	a	h	b	b	b	a	b	a	b	a	b	a	b	h	b
OH02-16196	b	a	b	b	a	a	h	a	a	b	a	b	a	a	h	h	a	a	a	a	a	b	b	b	b	b	h	a	b	b	b	a	b	a	b	b	b	b	-	b	b	a	a	a	a	a	b	a	a
OH02-16197	a	b	b	b	a	b	b	a	a	b	a	a	b	b	a	b	b	b	a	a	b	a	b	h	a	a	b	h	b	a	b	a	a	b	a	h	b	b	b	a	-	b	b	a	a	b	a	a	a
OH02-16198	a	b	b	a	b	a	a	b	b	b	b	a	b	b	b	b	b	h	b	b	b	a	b	b	a	a	b	h	b	a	b	b	h	a	a	b	b	a	b	b	a	b	b	a	b	b	a	a	a
OH02-16199	a	b	h	b	b	b	b	b	b	a	a	b	a	a	b	b	h	b	a	b	a	a	b	h	a	a	a	a	b	a	a	a	a	h	a	a	a	b	b	b	b	a	b	a	b	a	a	b	-
OH02-16201	a	b	a	a	h	b	b	h	a	a	a	a	b	a	b	b	b	a	a	b	h	b	b	b	a	a	b	h	b	a	b	-	a	a	b	a	a	a	b	b	b	a	h	b	a	b	b	b	b
OH02-16202	a	b	b	b	a	a	b	h	b	b	a	b	b	b	b	b	b	b	b	b	a	a	b	b	a	a	h	h	b	a	a	b	a	a	b	b	a	a	a	a	a	a	a	b	a	a	a	h	b
OH02-16203	a	b	b	a	h	b	a	h	a	h	a	b	b	b	b	b	a	h	a	a	b	a	b	b	a	a	h	b	b	a	a	a	a	h	b	a	h	b	b	a	a	a	b	b	b	b	a	a	a
OH02-16204	a	a	b	a	h	b	b	a	b	b	a	b	a	a	b	a	b	a	b	a	b	a	a	b	b	a	h	a	a	b	b	b	b	h	b	a	h	b	b	b	a	b	a	b	b	a	a	a	-
OH02-16205	b	b	h	b	h	a	b	a	a	b	a	a	a	a	b	a	-	a	h	a	b	b	a	a	b	a	h	a	a	b	b	b	h	b	-	h	b	b	b	a	b	a	h	b	b	a	b	a	-
OH02-16206	b	b	h	b	b	a	b	a	b	a	a	b	-	a	b	a	b	b	b	a	a	a	a	a	h	b	h	a	h	a	a	a	h	a	b	b	a	a	b	b	b	b	a	b	b	a	a	a	b
OH02-16207	a	a	h	a	b	a	a	b	a	a	a	b	-	a	b	b	b	h	a	a	a	b	a	a	a	a	b	b	b	b	b	h	h	a	b	h	a	a	b	b	b	a	b	a	a	b	a	b	b
OH02-16208	a	b	a	b	a	b	a	a	b	b	a	b	a	a	b	b	b	b	a	b	b	a	b	b	a	b	b	a	b	b	a	a	b	a	b	h	a	a	b	a	b	a	a	a	a	b	a	b	a
OH02-16209	a	a	a	a	b	b	a	a	b	b	a	b	b	a	b	b	b	a	a	a	a	a	a	b	a	a	b	a	b	b	a	b	a	b	-	h	b	b	a	a	b	a	b	b	b	b	b	a	a
OH02-16210	a	b	a	a	b	a	a	b	b	b	b	a	b	a	b	b	b	b	a	a	a	a	a	b	b	a	b	b	b	a	a	b	a	a	a	b	b	a	b	b	b	h	b	a	a	b	b	a	b
OH02-16211	a	b	a	a	b	b	a	a	a	a	b	b	a	-	a	b	b	a	a	a	a	a	a	b	b	a	b	a	b	b	a	b	a	a	b	-	a	a	b	a	-	a	h	b	a	b	a	b	b
OH02-16212	a	b	b	b	a	h	b	b	a	b	b	b	b	a	b	b	a	h	a	a	a	b	a	a	a	a	b	a	b	a	a	a	b	h	b	a	h	b	b	a	a	a	a	a	a	b	b	b	a
OH02-16213	a	b	b	b	b	a	h	a	a	b	b	a	b	a	b	b	a	b	b	a	a	b	-	a	a	b	b	a	b	a	a	a	a	b	a	a	b	b	b	b	a	b	a	a	b	a	b	b	a
OH02-16214	b	b	b	b	b	b	a	b	b	a	b	b	b	b	a	b	b	a	b	b	a	a	a	a	b	-	b	a	b	a	a	b	b	a	a	b	a	b	a	b	a	a	h	b	a	a	a	b	a
OH02-16215	b	b	b	a	a	a	b	a	a	a	a	b	a	a	b	a	b	a	b	a	a	b	b	a	b	a	a	b	a	b	a	a	h	a	a	a	a	a	a	a	a	a	a	a	a	a	a	a	b
OH02-16216	a	b	a	a	a	a	h	a	a	b	a	a	a	b	b	h	a	b	b	b	a	a	b	a	b	a	h	a	b	a	a	b	b	b	b	h	h	a	a	b	a	a	a	a	a	a	a	h	b
OH02-16217	a	a	a	a	a	a	a	a	a	b	a	b	b	b	b	b	b	a	a	a	b	a	b	a	a	b	b	b	b	a	b	a	b	b	b	a	b	-	b	b	b	b	h	a	a	a	b	h	a
OH02-16218	b	b	b	b	a	a	b	a	b	b	a	a	b	a	b	b	h	a	a	b	b	a	b	a	a	a	b	b	b	b	b	a	a	b	-	h	b	-	b	b	b	a	b	a	b	b	b	a	a
OH02-16219	b	a	a	a	a	a	b	a	h	a	a	b	b	a	b	b	h	a	b	b	b	b	b	a	a	a	b	b	b	b	a	b	b	a	b	h	a	-	b	a	b	a	h	a	b	b	a	b	a
OH02-16221	b	a	b	b	a	a	b	b	h	b	a	a	a	a	b	b	h	a	b	b	a	b	a	b	a	b	b	a	b	b	a	-	b	b	a	h	b	b	b	a	a	b	a	a	b	a	b	h	b
OH02-16222	b	b	b	b	a	b	a	a	b	b	a	a	a	b	-	b	h	b	a	b	b	a	b	b	a	a	b	a	b	a	b	a	-	b	b	b	b	b	a	b	b	a	b	b	a	b	a	a	a
OH02-16223	b	b	a	b	a	b	a	a	b	a	a	b	a	a	-	b	h	b	a	b	a	a	b	a	a	a	b	b	b	a	a	a	b	b	b	h	a	b	b	a	b	a	b	a	a	a	b	a	a
OH02-16224	a	a	a	-	a	b	a	a	b	b	a	a	b	b	a	b	b	a	a	a	a	b	b	a	a	a	a	a	b	a	b	a	b	b	a	a	b	b	b	a	b	-	b	a	a	b	a	a	b
OH02-16225	a	b	b	b	a	b	b	b	a	a	b	b	b	b	b	a	a	b	b	a	a	a	b	a	b	b	a	a	a	b	b	b	h	a	b	h	a	b	b	b	b	b	a	b	b	b	a	h	a
OH02-16226	a	b	a	b	a	b	b	b	b	a	a	b	b	b	h	b	a	b	a	b	a	a	b	b	b	a	b	a	b	a	b	h	b	a	a	h	a	a	a	b	a	b	a	b	a	a	a	h	b
OH02-16227	a	a	a	b	a	a	b	h	-	b	a	a	a	a	b	b	b	h	a	b	a	a	a	b	b	a	b	b	b	a	b	a	a	b	b	a	h	a	b	a	b	a	b	a	a	a	b	b	a
OH02-16228	b	a	b	a	a	b	b	h	b	a	a	b	b	a	b	b	h	b	a	b	b	b	a	a	b	a	b	b	b	b	b	b	h	a	b	h	a	b	a	b	h	b	b	b	a	b	a	a	b
OH02-16229	a	b	a	a	a	a	b	b	a	a	a	h	-	a	h	b	h	a	b	b	a	a	a	a	b	a	b	b	b	a	b	b	a	a	a	b	a	a	a	b	a	a	a	b	a	b	a	a	a
OH02-16230	a	b	a	b	h	a	-	a	b	a	a	b	a	a	b	h	a	h	a	b	a	b	a	a	b	a	b	a	b	b	b	a	b	a	b	a	a	a	b	b	a	a	a	b	a	a	a	b	b
OH02-16231	b	b	b	b	h	a	b	a	b	a	a	h	-	a	b	h	h	h	a	b	a	b	b	a	b	a	h	a	b	b	b	a	b	h	-	b	a	b	a	b	a	b	h	a	a	a	a	a	b
OH02-16233	a	a	b	a	b	b	a	h	h	a	a	h	b	b	b	b	a	a	b	b	b	b	b	b	a	b	b	b	b	a	b	h	a	a	b	b	h	b	a	b	a	b	h	a	b	b	a	a	b
OH02-16234	a	b	a	b	a	b	b	a	b	a	a	b	a	b	a	b	a	b	a	a	b	a	b	b	a	a	b	a	b	a	b	a	b	a	a	b	a	b	a	a	a	a	a	b	b	b	a	b	b
OH02-16235	a	b	a	b	a	a	-	-	h	a	a	a	-	-	b	h	-	-	b	b	b	a	a	a	a	b	b	a	.	a	b	a	-	a	a	a	-	b	b	b	-	-	b	a	b	b	a	a	a
OH02-16236	a	a	a	a	b	a	b	a	b	b	a	b	b	a	a	a	a	b	a	a	b	b	a	b	b	b	b	b	a	a	-	a	h	a	h	a	h	b	a	b	-	a	b	b	-	a	a	a	a
OH02-16237	b	a	a	a	b	a	b	a	h	a	a	a	a	a	a	b	a	h	a	a	a	b	b	a	a	b	b	b	b	b	b	h	b	a	a	a	a	b	a	a	-	b	a	b	b	a	b	b	b
OH02-16238	a	b	b	a	a	b	b	a	a	a	a	a	b	b	h	b	a	-	a	a	b	a	a	b	b	a	b	b	b	a	a	h	b	a	b	a	a	b	b	a	a	a	a	a	a	b	a	a	a
OH02-16241	a	b	b	b	b	b	a	b	b	a	b	a	b	b	b	b	h	a	b	a	a	a	a	b	a	a	b	b	b	a	b	b	a	a	b	b	-	a	a	b	-	a	h	a	a	b	b	-	a
OH02-16242	a	a	b	b	b	a	b	a	h	a	a	a	b	a	b	b	b	h	a	a	a	b	a	a	a	b	b	h	a	a	a	h	h	h	a	h	h	a	a	b	a	b	a	a	b	a	b	b	b
OH02-16243	b	b	a	b	b	b	b	a	b	a	a	h	h	b	h	a	b	b	a	a	b	a	a	a	a	b	h	a	a	b	b	b	a	h	a	b	h	a	a	b	-	a	b	b	b	b	a	b	a
OH02-16244	b	b	b	a	b	b	b	b	b	b	a	b	h	b	a	a	b	b	h	b	a	b	a	a	a	b	a	a	b	b	b	a	b	b	a	a	b	b	b	-	a	a	a	b	a	a	a	b	b
OH02-16245	b	b	b	a	-	-	h	b	h	a	b	a	b	b	b	b	a	h	a	b	a	a	a	b	a	a	a	a	b	a	b	a	-	a	a	h	a	b	b	b	b	h	b	a	a	a	a	a	b
OH02-16246	b	-	b	a	a	a	b	b	-	a	b	-	-	a	b	b	b	b	-	a	b	-	a	b	b	-	a	-	b	b	a	a	b	a	-	h	a	b	b	-	-	-	b	a	a	b	b	-	a
OH02-16247	b	b	a	b	b	b	a	h	a	b	a	a	-	b	a	b	b	a	b	b	a	b	-	a	a	b	b	b	b	a	a	h	a	a	a	h	a	a	b	b	a	h	b	b	a	b	a	b	b
OH02-16248	b	b	b	b	b	h	b	h	a	b	a	a	b	b	a	b	h	h	b	a	b	a	a	b	a	b	b	b	b	a	b	h	a	b	a	h	b	b	b	-	a	a	a	b	-	a	b	a	a
OH02-16249	b	b	a	b	b	b	b	b	a	b	a	a	a	b	b	b	b	a	h	b	b	a	b	a	b	a	a	a	b	a	b	b	a	b	b	b	a	a	a	-	h	h	b	b	b	h	b	a	b
OH02-16250	b	b	a	b	-	a	b	a	b	b	a	b	a	a	a	h	b	b	a	b	b	b	b	a	b	a	b	a	b	a	b	a	a	h	a	a	h	a	b	b	-	h	a	a	b	b	b	h	b
OH02-16251	-	b	b	a	-	a	b	h	a	b	a	a	b	a	a	b	b	b	a	b	a	b	a	b	b	a	a	a	b	a	b	a	a	b	a	a	h	b	b	-	-	b	a	a	b	b	b	a	b
OH02-16252	-	b	b	b	a	a	a	a	a	b	a	b	a	b	b	b	a	h	a	a	a	a	a	b	a	a	b	b	b	b	b	a	b	b	a	a	b	b	b	a	b	a	a	a	b	a	-	a	a
OH02-16253	b	b	b	-	b	a	b	a	a	b	a	b	a	b	b	h	b	a	a	a	a	a	b	b	a	a	a	a	a	a	b	h	b	b	a	b	a	a	a	a	a	a	h	b	b	a	a	a	a
OH02-16254	b	b	b	a	b	a	a	a	a	b	a	b	a	b	a	h	b	b	a	a	a	a	b	b	b	a	b	b	h	a	b	a	h	b	b	a	b	b	b	a	a	b	b	b	b	a	b	a	b
OH02-16255	b	b	a	a	b	a	b	a	a	a	a	a	a	b	h	h	b	a	a	b	a	b	b	b	b	a	b	a	b	b	b	a	a	a	b	a	a	a	a	a	-	a	a	b	a	a	b	-	b
OH02-16256	b	b	b	a	b	a	a	b	a	a	b	a	b	a	b	b	h	a	b	a	b	a	a	a	b	a	b	b	b	a	a	b	b	a	b	b	a	a	b	a	-	a	a	b	b	a	b	b	a
OH02-16257	b	a	b	b	b	b	a	a	a	b	a	b	b	a	h	b	h	a	a	b	a	a	a	b	b	-	b	b	b	b	b	b	h	b	b	h	b	b	b	b	-	a	a	a	b	b	b	a	a
OH02-16258	-	b	a	a	b	a	h	b	b	b	b	a	a	b	b	b	h	b	b	b	a	b	a	b	b	b	b	b	b	a	b	b	a	h	-	b	b	a	b	a	-	b	b	a	b	a	b	h	a
OH02-16259	b	a	b	a	a	b	a	b	b	a	a	a	a	a	h	b	a	h	b	a	a	b	a	b	b	a	b	h	b	a	a	b	a	b	a	b	a	a	b	a	a	a	a	b	a	a	b	b	a
OH02-16261	b	b	a	a	a	a	b	h	b	b	b	b	a	h	b	a	a	a	-	a	a	a	b	a	b	b	a	b	a	a	a	b	b	b	a	b	b	a	a	a	a	b	a	b	b	a	b	-	b
OH02-16262	b	a	a	b	b	b	a	h	a	b	b	a	b	a	b	h	b	a	a	a	a	a	b	a	a	a	b	b	a	a	a	b	b	b	b	a	a	b	a	b	b	a	h	b	b	b	b	b	a
OH02-16263	a	a	a	a	b	a	a	a	b	a	a	b	a	b	a	b	a	b	-	b	b	b	a	h	a	-	b	b	b	a	a	a	a	a	b	h	a	a	a	a	a	a	a	b	b	a	b	-	b
OH02-16265	a	a	a	b	a	b	a	a	a	b	a	a	b	a	a	b	a	b	b	b	a	a	b	b	a	-	b	a	b	b	a	b	b	b	a	b	a	a	a	b	b	a	b	b	b	b	b	b	b
OH02-16266	a	a	b	a	a	a	b	a	b	b	a	a	a	b	h	b	b	a	a	b	a	b	a	b	a	-	b	a	b	b	b	b	b	b	a	a	b	a	b	a	a	b	b	-	a	b	a	a	a
OH02-16267	b	b	a	a	a	b	a	b	-	a	b	a	b	b	h	h	b	b	h	a	b	a	a	a	a	-	b	b	b	b	b	b	b	a	-	b	a	a	a	a	b	a	b	a	b	a	a	a	a
OH02-16268	b	b	b	a	a	a	-	h	a	a	a	a	a	h	a	b	b	a	b	b	a	b	b	a	b	b	b	b	b	a	b	b	a	a	a	a	h	a	b	b	a	b	-	-	b	a	b	-	b
OH02-16269	b	-	a	b	a	b	h	a	b	b	a	a	b	h	h	b	a	a	a	b	a	a	b	a	b	b	a	a	b	a	b	a	b	h	b	a	b	a	a	a	b	a	-	a	b	b	a	h	a
OH02-16270	a	b	b	b	a	b	h	h	a	b	a	a	a	-	a	b	a	-	b	b	b	a	a	a	a	b	b	b	b	b	-	a	a	b	b	a	b	a	b	b	b	h	b	-	b	b	a	-	a
OH02-16271	a	b	a	b	b	-	-	b	b	b	b	b	b	b	a	a	a	h	a	a	b	a	a	h	a	h	a	a	a	b	b	h	a	b	a	h	b	a	b	a	b	a	b	b	a	b	a	-	a
OH02-16272	a	b	b	a	h	b	h	a	a	a	a	a	b	a	a	b	b	h	b	b	b	a	b	h	a	b	b	b	b	b	a	h	a	a	b	h	a	a	b	a	b	a	b	-	a	b	b	-	a
OH02-16273	b	b	a	b	b	a	h	b	-	b	a	b	b	b	a	b	a	b	a	a	a	b	b	h	a	b	b	b	b	b	b	h	a	a	b	h	a	b	a	b	b	b	a	b	b	a	b	h	b
OH02-16274	a	h	b	b	b	b	a	b	a	b	b	b	b	b	b	b	a	a	a	b	b	b	b	a	a	a	b	b	b	a	b	a	h	b	a	h	b	a	a	a	-	b	b	-	b	a	a	a	a
OH02-16275	a	b	b	b	a	a	a	h	b	b	a	a	b	b	b	b	a	h	h	b	a	a	a	h	a	b	b	b	b	a	-	a	a	b	b	a	b	a	b	b	-	a	b	b	b	-	b	a	a
OH02-16276	b	a	b	a	a	b	b	h	h	b	a	a	b	b	a	b	b	b	a	a	a	b	b	b	a	-	b	a	b	a	b	a	a	b	b	-	b	b	b	a	b	b	b	-	b	h	b	b	b
OH02-16277	b	a	a	b	a	b	a	b	a	b	a	a	a	b	a	b	b	a	a	b	a	h	a	a	b	-	b	b	b	b	b	a	a	b	a	a	b	b	b	a	a	a	h	a	a	-	b	a	b
OH02-16278	a	b	b	a	a	b	a	b	a	b	a	a	-	a	a	b	a	a	b	b	b	a	b	b	a	-	b	b	b	a	b	a	a	b	b	a	b	b	b	b	b	b	b	-	b	-	b	a	b
OH02-16279	b	b	b	b	h	b	a	b	b	b	a	a	a	a	a	b	a	b	b	b	a	a	a	a	a	b	b	b	b	a	a	a	b	b	b	b	b	b	a	a	b	b	b	a	a	b	b	b	b
OH02-16281	b	b	b	a	h	b	b	a	b	b	a	b	b	b	a	h	b	a	a	a	a	a	b	a	a	a	a	a	h	a	b	h	b	h	a	b	a	b	a	b	b	b	a	-	a	h	a	a	b
OH02-16282	a	b	b	a	b	b	b	a	-	b	b	a	a	a	a	h	b	a	a	a	a	b	b	b	a	b	b	b	a	b	a	b	b	a	a	a	a	b	b	a	a	b	h	b	a	b	a	b	a
OH02-16283	b	b	b	a	h	b	b	b	h	a	b	b	b	b	b	h	a	b	a	a	b	a	b	a	b	b	b	b	b	a	a	h	b	a	a	h	b	a	b	b	b	b	b	-	b	b	a	-	b
OH02-16284	a	b	a	a	a	b	a	a	b	a	b	a	b	b	b	a	b	b	a	a	-	a	a	b	b	b	a	-	a	a	b	b	a	a	b	-	a	-	a	a	a	a	b	-	a	b	a	h	a
OH02-16285	a	b	h	a	b	a	a	b	a	b	b	b	b	a	a	b	h	b	a	b	b	b	a	-	b	a	b	b	b	a	a	h	b	a	a	b	a	a	a	a	b	b	b	a	b	a	a	a	a
OH02-16286	a	h	b	b	b	a	a	b	b	a	b	a	a	-	b	b	b	a	b	a	-	a	a	a	b	b	b	b	b	a	a	h	a	a	a	b	a	a	a	a	b	a	h	a	b	a	a	a	a
OH02-16287	a	h	a	b	b	b	a	b	a	a	a	a	a	a	b	a	a	b	a	a	b	h	a	a	b	b	a	b	a	b	b	a	a	a	a	a	a	b	b	a	a	a	b	b	b	a	a	h	b
OH02-16288	b	a	a	b	b	b	b	b	a	b	b	b	b	a	b	b	b	h	b	a	a	b	a	b	a	b	b	b	b	a	h	b	a	a	b	h	a	a	a	b	a	b	a	a	b	b	a	b	b
OH02-16289	a	b	a	b	h	a	b	h	a	b	a	a	b	b	a	b	a	b	b	a	a	b	b	a	a	b	b	a	b	a	a	a	b	h	b	-	b	b	b	a	a	a	a	a	b	a	b	a	a
OH02-16290	b	h	b	b	b	b	a	a	a	b	a	a	a	a	h	a	b	b	b	a	a	b	a	b	b	a	h	b	a	a	a	a	b	a	b	h	b	a	b	-	a	a	a	a	b	b	a	-	b
OH02-16291	a	b	b	a	a	h	a	a	a	b	a	b	a	b	a	b	a	a	a	a	a	b	b	a	b	b	h	a	b	b	h	a	b	b	a	h	a	a	b	-	a	b	b	b	b	a	a	-	b
OH02-16292	a	b	a	b	b	a	a	b	b	b	a	a	a	b	b	a	h	b	a	a	a	b	b	h	b	b	h	a	a	b	h	b	a	h	b	b	b	a	b	b	b	a	a	b	b	b	b	b	a
OH02-16293	a	b	b	a	h	a	a	a	a	-	a	b	b	b	a	b	b	a	a	a	a	a	a	-	a	b	b	a	b	b	b	b	b	a	a	a	a	a	b	a	a	b	a	b	b	a	a	a	b
OH02-16294	b	b	h	b	h	a	b	a	b	b	a	b	a	a	h	a	b	b	a	a	a	b	a	b	b	-	b	b	a	b	a	a	a	b	a	a	b	a	b	b	b	b	b	a	b	a	a	a	b
OH02-16295	b	h	b	b	b	b	a	b	b	a	a	b	a	b	a	a	a	b	b	a	b	a	b	b	b	b	a	b	a	a	a	a	b	a	a	a	a	a	b	b	a	b	a	b	b	b	b	b	b
OH02-16296	b	h	b	b	h	a	h	h	b	a	a	a	a	a	a	a	h	h	b	b	b	b	b	a	b	a	a	b	a	b	b	a	a	a	b	a	a	b	a	a	b	a	h	b	b	b	a	h	b
OH02-16297	a	h	b	a	a	a	-	h	a	b	a	a	a	b	a	b	b	b	a	b	b	b	a	a	a	b	b	a	b	b	h	a	a	b	b	a	b	a	b	b	b	a	b	a	b	b	a	a	b
OH02-16298	a	b	a	a	b	a	b	a	b	a	a	b	b	a	b	b	a	b	a	b	b	a	a	a	a	h	b	b	b	a	a	b	b	a	a	b	a	-	b	a	a	a	a	b	a	a	b	a	a
OH02-16299	b	-	a	a	h	b	b	h	a	a	a	a	b	b	-	a	b	a	a	a	a	b	b	b	b	a	a	b	a	a	a	a	b	a	b	b	a	a	a	b	b	b	h	b	b	b	b	a	-
OH02-16301	a	a	a	a	a	b	b	a	b	b	a	b	a	a	h	a	b	a	a	b	b	b	a	b	b	a	a	a	a	b	a	a	b	h	b	b	a	b	a	a	b	a	b	b	a	a	b	a	a
OH02-16302	a	b	a	a	h	a	a	b	b	b	a	a	b	b	a	b	a	a	h	b	b	b	a	b	a	b	b	a	b	b	b	b	a	h	b	h	b	a	a	b	a	b	b	a	b	a	a	b	b
OH02-16303	b	a	a	a	a	a	b	a	a	b	a	a	a	a	a	a	a	h	b	b	b	b	a	b	a	b	a	a	a	b	a	a	a	b	b	h	b	b	b	b	a	b	b	a	b	a	a	a	b
OH02-16304	b	b	b	a	a	a	a	h	b	b	a	a	a	b	b	b	b	b	b	a	a	b	a	b	b	-	b	b	b	b	b	a	a	b	b	h	b	b	b	b	b	b	a	a	a	b	b	a	b
OH02-16305	b	a	a	a	a	b	b	h	a	b	a	a	b	a	h	b	b	a	h	a	b	b	b	a	b	-	a	a	b	b	a	-	a	b	a	a	b	b	b	b	a	b	b	b	b	a	a	a	a
OH02-16306	a	b	a	b	b	b	b	b	b	-	a	a	b	a	-	b	h	b	h	b	b	a	b	a	a	b	a	b	b	b	-	a	a	b	b	a	b	b	b	b	a	b	a	b	b	b	b	a	b
OH02-16307	b	a	b	b	b	b	b	b	b	b	a	b	a	a	a	a	b	a	a	b	a	a	b	a	a	-	a	a	a	a	b	b	a	b	b	b	b	a	a	a	a	a	b	a	b	a	b	a	b
OH02-16308	a	a	b	b	b	b	a	b	a	a	a	a	a	a	b	h	b	a	a	b	a	a	b	a	a	a	b	a	b	b	b	b	a	a	b	b	a	b	a	a	a	a	a	b	b	b	a	h	b
OH02-16309	a	b	b	b	h	a	a	a	b	a	a	a	b	a	a	b	b	b	a	b	a	a	b	a	a	b	b	b	b	b	b	-	a	a	b	a	a	b	b	a	a	a	a	b	a	b	a	b	a
OH02-16310	a	a	b	b	a	a	a	b	a	a	b	b	a	a	h	-	a	a	a	a	a	a	a	b	b	a	a	-	a	b	h	-	h	a	a	a	a	b	a	b	b	-	b	a	b	a	b	a	a
OH02-16311	a	b	b	a	a	b	b	a	b	b	a	a	a	a	b	b	a	b	h	b	a	b	a	b	b	a	b	-	b	a	b	b	b	b	a	h	b	a	b	a	a	-	a	b	a	a	b	b	a
OH02-16312	a	b	b	b	h	b	b	a	a	b	a	a	b	b	h	b	h	h	b	a	b	b	a	b	a	b	a	-	b	b	h	b	a	h	b	h	b	a	a	a	a	-	a	b	b	a	b	b	b
OH02-16313	-	-	a	b	h	a	b	a	b	b	a	b	b	b	a	b	b	b	a	a	b	a	a	a	a	b	h	-	b	a	a	a	b	b	a	a	a	b	b	a	a	-	b	b	b	a	a	a	a
OH02-16314	a	h	h	a	h	b	a	b	a	b	a	b	a	a	b	b	h	b	a	a	b	a	b	b	h	a	a	-	b	a	h	b	a	h	b	b	a	a	b	b	a	-	a	b	a	b	b	a	a
OH02-16315	b	b	b	a	a	b	a	b	b	a	b	b	b	b	b	b	h	a	a	b	b	-	a	a	a	a	a	-	b	a	h	a	a	h	b	b	a	a	b	a	a	-	a	a	a	a	a	b	a
OH02-16316	a	h	b	b	h	a	b	a	a	b	a	a	a	a	h	b	h	b	a	a	b	b	a	a	b	b	b	-	b	a	b	a	a	a	a	a	b	a	a	b	-	-	h	a	b	b	a	b	b
OH02-16317	b	b	b	a	b	b	a	b	b	b	b	a	a	b	b	a	b	h	h	a	b	b	b	b	a	b	b	-	a	b	b	a	a	a	h	a	b	a	a	b	-	-	b	a	a	a	a	h	b
OH02-16318	b	b	b	a	a	a	b	a	a	b	a	-	a	a	a	h	b	h	b	b	b	a	a	a	a	a	a	-	b	h	b	b	a	h	b	b	h	a	a	b	-	-	h	a	a	a	a	h	a
[truncated: 40 more columns]

## Sheet: VA2RIL MEANS
POP	NAME	TYPE	TW	PRO		AWRC	LA	LAADJ	H2O	SUC	NACO	FYLD	SE	CD	TG
VA2	OH02-16271	RIL	58.26	8.97	1	55	85.4	85.53	51.62	85.59	63.96	71.84	55.05	18.5	7
VA2	OH02-16173	RIL	58.84	9.15	1	54.4	102.98	101.95	51.56	86.98	65.78	70.49	56.15	18.1	6
VA2	OH02-16216	RIL	58.54	9.2	1	53.29	100.75	99.32	48.86	82.1	61.87	72.84	56.52	18	4
VA2	OH02-16192	RIL	59.5	9.29	1	54.08	103.93	102.04	52.05	86.38	64.06	71.33	51.9	18.3	6
VA2	OH02-16254	RIL	56.36	9.29	1	56.6	101.89	99.77	52.42	88.96	67.36	69.69	57.11	17.8	5
VA2	OH02-16204	RIL	57.49	9.33	1	54.42	104.69	102.49	52.25	87.86	65.38	70.18	55.14	17.8	5
VA2	OH02-16312	RIL	58.27	9.33	1	52.4	103.13	100.83	48.63	81.57	60.93	72.9	56.17	.	.
VA2	OH02-16294	RIL	57.47	9.39	1	54.63	106.4	103.73	50.91	86.08	64.52	70.17	55	18.1	5
VA2	OH02-16257	RIL	60.14	9.44	1	53.03	108.02	105.03	49.4	84.04	63.3	71.98	55.34	18.1	5
VA2	OH02-16272	RIL	58.51	9.49	2	53.21	97.97	94.44	50.35	82.94	61.42	71.65	52.03	18.1	6
VA2	OH02-16284	RIL	59.27	9.49	2	54.14	98.09	94.63	52.24	85.17	64.89	71.97	53.43	17.9	4
VA2	OH02-16168	RIL	57.31	9.52	2	54.61	93.92	90.49	51.85	86.02	65.11	71.57	55.76	17.7	4
VA2	OH02-16266	RIL	59.5	9.52	2	54.25	112.48	108.93	50.78	88.11	63.74	71.62	54.52	18.2	5
VA2	OH02-16313	RIL	58.46	9.54	2	52.83	109.03	105.16	49.75	84.02	61.59	70.31	57.03	18.4	7
VA2	OH02-16317	RIL	58.05	9.54	2	56.62	92.87	89.07	53.07	90.63	68.71	69.46	56.85	17.5	2
VA2	OH02-16203	RIL	58.59	9.56	2	52.79	103.18	99.25	48.94	83.68	61.79	71.01	55.77	18.4	5
VA2	OH02-16228	RIL	57.69	9.56	2	54.53	92.21	88.44	52.24	85.52	65.29	70.76	53.67	18	4
VA2	OH02-16213	RIL	59.16	9.59	2	58.15	94.17	90.11	52.7	90.24	68.96	70.42	57.66	17.9	3
VA2	OH02-16195	RIL	59.32	9.6	2	52.83	109.15	105.14	50.6	84.73	61.71	71.54	53.94	18.3	7
VA2	OH02-16299	RIL	58.79	9.6	2	54.83	105.67	101.52	52.55	89.32	66.9	70.56	54.88	17.7	4
VA2	OH02-16231	RIL	59.15	9.63	2	53.3	94.37	89.79	50.91	83.65	62.63	72.43	52.35	18	4
VA2	OH02-16205	RIL	57.71	9.64	2	54.23	101.58	97.08	51.75	86.82	63.92	70.69	52.65	17.8	4
VA2	OH02-16210	RIL	58	9.66	2	59.6	102.14	97.55	54.22	92.97	71.88	68.91	61.05	17.5	2
VA2	OH02-16302	RIL	56.95	9.66	2	54.22	97.99	93.53	50.61	84.57	64.14	71.48	57.42	18.1	4
VA2	OH02-16273	RIL	58.23	9.69	2	52.72	97.86	93.18	50.06	83.95	61.7	71.99	53.93	18.3	5
VA2	OH02-16222	RIL	59.34	9.71	2	53.38	105.68	100.69	49.63	84.14	61.75	72.39	53.54	18.1	5
VA2	OH02-16303	RIL	59.18	9.71	2	54.16	109.06	104.19	51.09	87.94	64.72	71.27	55.04	18	7
VA2	OH02-16261	RIL	57.72	9.72	2	54	81.92	77.07	50.25	83.71	63.16	71.05	53.2	18.4	8
VA2	OH02-16189	RIL	59.59	9.74	2	54.05	89.93	84.87	51.02	85.75	64.24	71.57	52.52	18.1	3
VA2	OH02-16282	RIL	58.15	9.74	2	56.13	93.24	88.05	53.43	87.8	67.04	71.17	54.41	17.6	3
VA2	OH02-16174	RIL	59.12	9.75	2	53.4	109.68	104.53	50.92	85.28	62.35	71.12	52.87	17.9	4
VA2	OH02-16316	RIL	57.22	9.78	2	55.67	101.39	95.92	52.55	88.18	65.57	69.31	54.44	17.7	5
VA2	OH02-16186	RIL	57.06	9.8	2	53.53	99.64	94.15	50.29	84.05	62.49	70.29	56.06	18.3	6
VA2	OH02-16287	RIL	57	9.81	2	52.77	101.24	95.59	50.78	83.65	62.72	71.74	53.73	17.9	5
VA2	OH02-16256	RIL	57.78	9.84	2	55.08	79.82	73.94	51.33	85.99	64.55	71.31	55.12	17.9	4
VA2	OH02-16181	RIL	56.98	9.85	3	54.38	105.36	99.5	52.85	86.52	63.56	70.83	53.74	17.9	6
VA2	OH02-16183	RIL	57.77	9.85	3	54.89	95.15	89.11	51.17	87.69	65.68	69.78	56.3	17.7	3
VA2	OH02-16295	RIL	58.91	9.85	3	55.41	96.98	91.15	52.61	87.09	66.7	70.63	53.68	17.8	7
VA2	OH02-16315	RIL	59.02	9.85	3	55.51	78.78	72.92	52.74	85.83	66.42	71.82	54.79	18.2	5
VA2	OH02-16278	RIL	58.38	9.87	3	53.2	94.32	88.21	50.1	81.62	60.55	74.27	49.62	18.6	8
VA2	OH02-16286	RIL	58.88	9.87	3	53.03	102.3	96.24	49.83	82.47	62.42	71.3	53.82	18.2	8
VA2	OH02-16207	RIL	57.92	9.88	3	53.83	95.56	89.34	50.85	85.2	63.87	70.31	56.05	18.1	4
VA2	OH02-16250	RIL	58.54	9.88	3	54.85	94.9	88.84	53.04	88.61	66.47	70.34	53.32	17.7	3
VA2	OH02-16215	RIL	59.05	9.89	3	56.06	108.22	102.13	53.41	91.21	67.47	70.13	54.93	17.7	4
VA2	OH02-16285	RIL	57.16	9.89	3	53.15	96.33	90.2	49.99	83.24	62.73	71.66	57.09	18.3	6
VA2	OH02-16187	RIL	57.68	9.91	3	52.86	87.55	81.26	51.07	82.55	61.79	73.54	52.91	18.3	6
VA2	OH02-16219	RIL	59.26	9.92	3	52.57	91.04	84.52	49.81	81.22	61.19	72.91	52.43	18.2	7
VA2	OH02-16224	RIL	58.2	9.92	3	52.66	109.92	103.54	49.73	82.38	61.92	72.48	54.03	18.5	8
VA2	OH02-16182	RIL	59.67	9.93	3	52.9	106.59	99.99	49.46	82.83	61.29	71.07	52.41	18.2	3
VA2	OH02-16193	RIL	59.42	9.93	3	55.06	89.23	82.79	51.33	84.7	63.58	71.39	54.13	18.1	5
VA2	OH02-16244	RIL	56.93	9.95	3	54.83	95.72	89.23	51.44	90	65.55	70.7	57.08	18.3	7
VA2	OH02-16170	RIL	58.35	9.96	3	54.42	81.54	74.99	51.73	87.05	64.56	71.44	54.63	17.9	4
VA2	OH02-16206	RIL	57.57	9.96	3	55.36	102.29	95.64	52.73	89.05	65.88	69.46	55.65	17.7	5
VA2	OH02-16314	RIL	59.48	9.96	3	56.21	86.05	79.46	52.21	86.67	66.02	70.6	54.47	17.7	3
VA2	OH02-16259	RIL	57.66	9.97	3	54.16	106.96	100.17	51.45	85.08	63.97	71.83	53.36	17.9	4
VA2	OH02-16263	RIL	56.52	9.97	3	53.48	104.93	98.15	50.66	84.53	63.54	71.26	55.79	18.3	3
VA2	OH02-16310	RIL	57.86	9.97	3	56.86	94.88	88.09	53.5	89.61	69.23	69.66	54.99	17.5	5
VA2	OH02-16199	RIL	59.28	9.98	3	53.84	91.27	84.36	51.07	83.44	61.81	72.65	52.62	18.4	5
VA2	OH02-16262	RIL	57.85	9.99	3	56.74	100.42	93.73	53.83	91.5	68.54	70.42	54.44	17.6	7
VA2	OH02-16202	RIL	59.96	10	3	54.86	93.88	87.12	52.33	84.58	63.58	70.18	48.85	17.7	4
VA2	OH02-16212	RIL	56.91	10	3	59.86	86.6	79.63	51.87	85.53	65.12	71.96	56.45	18	4
VA2	OH02-16226	RIL	57.78	10	3	54.58	100.56	93.61	52.3	86.35	64.62	71.07	51.68	17.8	5
VA2	OH02-16291	RIL	59.53	10	3	52.77	96.87	89.8	51.53	82.3	61.2	74.1	47.93	.	.
VA2	OH02-16236	RIL	57.89	10.01	3	55.82	104.04	96.95	53.73	88.82	65.82	70.24	54.63	17.1	3
VA2	OH02-16253	RIL	58.7	10.01	3	52.37	90.09	83.2	50.71	82.84	62.5	72.99	51.67	18.4	6
VA2	OH02-16230	RIL	58.83	10.02	3	54.76	100.62	93.67	52.72	84.33	64.15	72.39	49.56	17.8	5
VA2	OH02-16306	RIL	58.92	10.02	3	54.53	98.69	91.61	49.75	85.21	63.34	71.89	55.97	18.3	6
VA2	OH02-16309	RIL	57.23	10.03	3	55.28	99.42	92.33	52.97	86.54	64.64	70.71	54.54	17.9	7
VA2	OH02-16252	RIL	58.21	10.07	3	53.51	92.88	85.39	50	81.83	61	73.7	50.59	18.3	6
VA2	OH02-16304	RIL	59.01	10.07	3	53.22	94.03	86.77	51.55	84.27	63.04	72.09	51.46	18.1	7
VA2	OH02-16318	RIL	59.16	10.07	3	54.78	102.97	95.57	53.27	87.32	66.41	71.17	53.05	17.8	3
VA2	OH02-16176	RIL	58.81	10.08	3	56.51	122.3	114.76	53.88	93.39	68.59	69.26	55.19	17.8	6
VA2	OH02-16223	RIL	58.25	10.08	3	53.56	100.68	93.21	51.64	84.43	63.01	72.65	50.95	17.8	3
VA2	OH02-16218	RIL	58.64	10.09	3	52.46	101.8	94.07	49.99	81.71	60.05	73.39	49.42	18.5	6
VA2	OH02-16251	RIL	58.96	10.1	3	56.08	100.28	92.69	52.57	88.21	66.64	69.92	53.57	18.1	4
VA2	OH02-16277	RIL	57.9	10.1	3	53.7	108.27	100.61	52.23	85.8	62.68	71.83	50.48	17.7	3
VA2	OH02-16290	RIL	59	10.1	3	53.79	103.18	95.54	52.18	85.75	63.71	70.31	52.81	17.6	5
VA2	OH02-16191	RIL	59.16	10.11	3	52.97	105.57	97.7	50.16	82.57	60.61	72.3	50.61	18.1	5
VA2	OH02-16279	RIL	58.1	10.11	3	53.47	89.26	81.65	50.59	82.53	62.22	73.62	54.07	18.3	6
VA2	OH02-16289	RIL	58.33	10.11	3	53.08	96.88	89.24	50.28	84.58	62.79	71.66	55.83	18.6	6
VA2	OH02-16246	RIL	58.27	10.12	3	53.38	99.33	91.54	52.17	82.98	62.68	70.74	48.1	18.1	3
VA2	OH02-16296	RIL	59.92	10.13	3	55.08	122.58	114.75	52.85	90.87	66.53	69.7	55.38	17.5	4
VA2	OH02-16165	RIL	59.65	10.14	3	53.93	99.46	91.53	51.19	84.17	62.48	71.13	51.12	18.3	5
VA2	OH02-16161	RIL	59	10.15	3	53.54	96.14	88.02	52.15	86.2	63.95	70.9	51.51	18.1	7
VA2	OH02-16172	RIL	58.36	10.15	3	53.54	85.83	77.92	51.14	84.72	62.56	72.14	53.07	18.1	3
VA2	OH02-16190	RIL	57.49	10.15	3	55.82	94.05	85.9	52.47	84.76	65.37	70.37	57.69	18.3	6
VA2	OH02-16258	RIL	58.49	10.15	3	59.98	106.93	98.78	54.46	97.3	71.55	67.96	60.04	17.7	4
VA2	OH02-16288	RIL	57.28	10.15	3	54.19	81.01	72.93	51.94	84.53	64.12	71.5	53.37	18.2	3
VA2	OH02-16197	RIL	58.91	10.16	3	52.42	95.89	87.89	50.6	82.8	61.14	72.97	49.41	18.1	5
VA2	OH02-16301	RIL	59.44	10.16	3	53	110.94	102.96	50.67	85.7	63.49	71.88	50.72	17.8	4
VA2	OH02-16293	RIL	57.82	10.17	3	53.37	94.25	86.15	51.83	84.06	64.61	70.75	53.45	17.8	6
VA2	OH02-16188	RIL	60.27	10.2	3	53.1	102.04	93.78	52.03	84.63	62.91	72.21	50.27	18.1	5
VA2	OH02-16292	RIL	59.2	10.2	3	53.48	110.56	102.14	51.6	87.46	63.37	70.89	52	17.9	6
VA2	OH02-16221	RIL	57.95	10.21	3	52.56	105.15	96.66	50.28	83.7	61.69	71.82	52.83	18.6	6
VA2	OH02-16214	RIL	57.77	10.22	3	55.08	86.03	77.55	52.27	84.68	64.7	71.9	55.94	18	5
VA2	OH02-16276	RIL	58.13	10.22	3	53.65	117.64	109.27	51.4	87.71	63.32	70.32	53.94	17.9	3
VA2	OH02-16177	RIL	57.06	10.24	3	55.71	97.52	88.76	53.55	86.87	67.48	70.01	52.22	17.7	6
VA2	OH02-16269	RIL	59.09	10.24	3	52.52	103.63	94.99	50.86	85.52	61.82	73.51	53.12	18.1	5
VA2	OH02-16163	RIL	57.42	10.27	4	53.98	99.88	91.19	51.05	84.3	63.5	69.74	54.57	18.1	8
VA2	OH02-16201	RIL	59.44	10.27	4	55.13	98.41	89.63	52.95	88.88	65.18	70.62	53.23	18.2	6
VA2	OH02-16208	RIL	57.62	10.27	4	53.66	108.91	100.05	51.33	86.79	64.34	70.08	53.21	18.2	6
VA2	OH02-16247	RIL	59.24	10.27	4	53.76	94.74	85.96	51.19	85.99	63.92	71.08	54.22	18	5
VA2	OH02-16243	RIL	57.41	10.3	4	54.81	103.58	94.57	52.43	86.43	63.47	69.94	51.28	17.6	5
VA2	OH02-16297	RIL	58.75	10.3	4	55.53	101.47	92.26	52.85	85.78	65.48	71.85	49.39	17.5	4
VA2	OH02-16241	RIL	58.3	10.32	4	54.85	85.33	76.11	52.39	87.96	65.43	70.96	55.28	18	5
VA2	OH02-16267	RIL	58.3	10.32	4	54.38	91.83	82.52	52.43	86.07	64.66	71.85	52.1	17.6	3
VA2	OH02-16308	RIL	57.28	10.32	4	54.58	77.49	68.29	52.63	84.19	64.3	71.6	53.4	18.2	7
VA2	OH02-16311	RIL	57.8	10.33	4	53.71	92.79	83.4	51.92	87.26	65.3	71.06	54.17	17.8	5
VA2	OH02-16217	RIL	57.45	10.35	4	54.22	107.74	98.3	52.47	86.85	63.78	71.76	53.08	17.8	5
VA2	OH02-16166	RIL	56.38	10.36	4	54.06	100.66	91.39	49.67	83.65	62.95	72.68	55.52	18.4	5
VA2	OH02-16265	RIL	58.33	10.36	4	54	103.31	93.92	51	86.16	62.47	73.01	50.4	17.9	7
VA2	OH02-16307	RIL	57.8	10.36	4	54.05	102.42	92.97	52.73	84.17	63.44	70.56	50.62	17.9	7
VA2	OH02-16234	RIL	59.02	10.37	4	53.56	104.2	94.48	51.43	83.98	61.25	71.82	47.7	17.9	4
VA2	OH02-16298	RIL	57.07	10.38	4	53.16	106.41	96.77	50.65	84.36	62.13	71.75	52.73	18.4	7
VA2	OH02-16238	RIL	57.53	10.4	4	54.18	98.02	88.18	51.03	88.56	62.75	70.55	53.14	18.6	8
VA2	OH02-16171	RIL	59.14	10.42	4	53.15	98.08	88.16	51.83	82.12	61.97	72.65	47.19	18	6
VA2	OH02-16209	RIL	59.18	10.42	4	54.38	114.07	104.13	51.9	88.46	64.5	70.74	53.09	17.7	3
VA2	OH02-16283	RIL	57.81	10.42	4	54.83	90.36	80.53	51.54	86.19	64.28	71.69	55.73	18.1	4
VA2	OH02-16229	RIL	58.33	10.43	4	54.19	88.29	78.38	51.36	82.09	61.75	71.45	49.72	18.1	5
VA2	OH02-16281	RIL	58.36	10.44	4	53.55	100.08	89.9	50.97	86.08	62.38	72.79	52.67	18.5	5
VA2	OH02-16227	RIL	58.34	10.45	4	52.94	98.35	88.25	51.29	83.88	62.51	72.65	52.01	17.9	5
VA2	OH02-16249	RIL	58.49	10.45	4	53.22	80.4	70.34	51.58	82.51	62.07	72.17	51.17	18.2	7
VA2	OH02-16185	RIL	58.27	10.48	4	54.59	105.65	95.39	52.53	89.35	64.97	70.18	52.85	17.8	5
VA2	OH02-16169	RIL	60.25	10.49	4	55.43	122.95	112.66	54.45	90.41	65.35	70	50.32	17.5	4
VA2	OH02-16194	RIL	59.08	10.49	4	54.57	93.71	83.37	52.7	87.62	64.93	71.3	50.84	17.7	4
VA2	OH02-16196	RIL	59.19	10.49	4	53.71	113.31	102.95	52.29	86.73	63.21	73.03	47.25	17.7	2
VA2	OH02-16274	RIL	57.85	10.49	4	54.91	81.45	70.93	51.78	84.62	63.52	71.86	50.38	18.2	8
VA2	OH02-16237	RIL	56.13	10.5	4	53.21	100.71	90.24	51.42	86.3	63.44	70.75	54.6	18.2	4
VA2	OH02-16178	RIL	58.99	10.51	4	53.28	99.1	88.54	51.38	84.87	62.44	71.42	51.8	18.4	8
VA2	OH02-16164	RIL	59.49	10.52	4	53.47	107.81	97.14	51.8	85.57	62.52	71.15	50.47	17.9	4
VA2	OH02-16275	RIL	59.17	10.54	4	54.02	103.27	92.45	51.32	86.38	62.84	73.43	50.57	16.8	3
VA2	OH02-16211	RIL	58.95	10.56	5	55.04	95.95	85.07	53.33	87.16	64.12	71.17	52.5	17.6	5
VA2	OH02-16167	RIL	57.77	10.57	5	52.63	110.12	99.34	51.63	85.73	62.78	71.31	52.37	17.7	6
VA2	OH02-16233	RIL	57.1	10.58	5	52.61	101.47	90.58	49.7	81.1	60.12	73.31	50.5	18.2	5
VA2	OH02-16255	RIL	58.4	10.6	5	53.86	108.73	97.59	52.19	87.57	63.98	70.89	53.02	18.1	7
VA2	OH02-16198	RIL	57.05	10.62	5	56.15	92.91	81.61	53.25	93.12	68.82	68.39	56.56	17.3	2
VA2	OH02-16175	RIL	59.58	10.66	5	53.22	111.62	100.14	51.4	84.88	63.01	71.61	50.93	17.5	3
VA2	OH02-16305	RIL	57.72	10.66	5	53.87	109.56	97.92	50.78	86.68	63.04	71.85	54.52	18.2	7
VA2	OH02-16225	RIL	58.57	10.71	5	56.19	86.36	74.32	54.02	88.42	69.09	69.95	54.6	16.9	1
VA2	OH02-16242	RIL	57.28	10.71	5	53.48	97.81	86.03	52.52	83.89	64.5	70.99	52.01	17.8	3
VA2	OH02-16268	RIL	56.83	10.75	5	54.46	107.01	94.94	51.93	86.79	64.09	70.82	53.41	17.8	4
VA2	OH02-16162	RIL	58.73	10.76	5	56.07	107.56	95.4	54.23	90.53	67.29	69.07	53.36	18.1	7
VA2	OH02-16235	RIL	58.33	10.76	5	52.55	102.3	90.23	51.28	82.63	61.02	73.81	47.59	18.2	6
VA2	OH02-16245	RIL	59.58	10.81	5	54.4	100.63	88.02	52.5	89.61	65.21	70.6	55.26	17.9	6
VA2	OH02-16270	RIL	58.18	10.89	5	53.84	95.46	82.27	50.45	83.36	60.95	72.2	48.23	17.9	5
VA2	OH02-16179	RIL	58.25	10.91	5	55.9	96.45	83.16	53.87	88.15	67.03	70.07	53.46	17.6	3
VA2	OH02-16248	RIL	57.4	10.97	5	53.51	93.15	79.34	51.4	83.57	63.93	71.78	50.95	18	3
VA2	Pioneer 26R46	Parent		10.2	6		100.3
VA2	SS550	Parent		9.9	7		922

## Sheet: 295 RILs
	TW	PRO	AWRC	LA	LADJ	H2O	SUC	NACE	FLYLD	SE	wmc024.1A	barc263	xgwm135	barc120	barc148	wmc11	wmc469	xgwm497/2A/3AD/5B	barc017	xgwm131.1B/3B/7B	barc176/7B	xgwm582	barc061	BARC187	XGWM273	BARC181	barc137	BARC081	XGWM268	WMC44	XGWM259	xgwm140	xgwm337	xgwm47h	xgwm232	xgwm311	wmc024	xgwm312	barc200	xgwm319	wmc149	xgwm630	barc59	xgwm526	barc55	xgwm389	barc147	barc087	cfd79
OH02-16001	58.6	10.3	53	101.6	92.5	51.4	86.4	62.7	71.6	-	b	b	-	b	a	a	b	a	b	b	b	a	a	a	a	h	a	a	a	a	a	b	a	a	b	b	a	-	h	b	b	a	h	a	b	b	b	b	b
OH02-16002	59.5	10.7	54.4	93.1	81.2	52.7	84.6	63.7	71.5	51.5	a	a	b	a	h	a	h	b	b	b	b	a	a	a	a	-	a	a	a	a	a	b	a	a	a	b	b	h	-	b	b	a	b	b	b	-	b	b	a
OH02-16003	58.9	10.8	53.5	105.3	93.1	51.4	85.1	62	72.6	52.5	a	a	b	b	a	h	b	b	b	a	a	a	a	a	b	b	b	a	a	a	a	b	b	a	b	b	b	h	b	b	b	a	a	b	b	b	b	b	b
OH02-16004	59.4	10.4	53.5	111.1	101.3	52.7	85.2	63.8	72.5	51	a	a	a	b	a	h	b	a	b	a	b	a	a	a	a	a	a	a	b	b	a	b	h	a	-	a	b	a	a	a	b	a	-	b	b	b	b	b	b
OH02-16005	57.5	10.1	54.2	89.8	82.4	51.6	84.8	63.9	71.1	54.1	a	a	a	a	b	a	a	b	b	a	a	a	a	a	b	b	b	b	a	a	b	a	a	b	b	a	b	a	h	b	b	a	a	b	b	b	b	b	b
OH02-16006	60.3	11.6	54.9	102.2	84.4	53.9	87.6	65.6	70.1	49.4	a	a	b	a	a	a	b	a	h	a	a	b	b	b	b	a	a	a	b	b	b	b	b	b	a	a	b	b	a	b	b	h	a	b	b	a	a	a	b
OH02-16007	58.7	10.6	53.8	94.2	83.3	51.5	83.1	61.9	71.8	52.9	b	b	a	b	h	a	a	a	h	a	b	a	b	a	a	a	a	a	a	a	a	b	a	a	b	a	b	b	a	a	a	h	b	a	b	a	b	b	b
OH02-16008	58.3	9.7	53.1	97.3	92.6	49.6	81.8	62.2	72.1	55.8	b	a	a	b	a	b	a	a	b	a	b	b	a	a	a	a	a	a	a	a	a	b	a	b	b	a	a	h	a	b	b	b	a	a	b	a	b	b	b
OH02-16009	58.4	10.5	52.6	81.7	71.7	48.7	78.3	60.5	74	55.7	a	a	a	a	b	b	a	b	h	a	b	b	a	a	a	b	a	a	b	a	a	a	a	b	b	a	b	a	h	b	b	b	b	b	b	b	b	b	b
OH02-16010	57.3	10.1	52.7	93.5	85.6	51.1	81.5	60.8	73.2	51.6	b	b	a	b	b	b	b	a	a	a	a	a	a	b	a	a	a	a	b	b	b	b	h	b	b	a	a	a	b	b	b	b	a	a	b	a	b	b	a
OH02-16011	58	9.8	53.4	85.4	79.6	51.8	82.6	62.7	73	53.3	a	a	a	a	b	b	b	a	a	b	a	a	a	a	a	b	b	b	b	a	a	a	b	b	b	b	a	a	b	b	b	b	a	a	b	h	b	a	b
OH02-16012	57.8	10.5	54.7	96.3	86	50.9	83.6	62.1	71.6	53.3	a	a	a	b	a	a	a	b	b	b	b	a	b	a	b	b	b	a	b	b	b	b	a	b	b	a	b	h	h	b	b	h	b	a	a	b	b	a	b
OH02-16013	58.4	10.3	53.6	94	85	49.6	83	60.1	74.1	51.8	a	a	b	b	b	a	b	b	b	b	b	a	a	a	b	b	b	b	b	b	b	b	a	b	b	b	b	a	b	b	b	-	a	a	b	b	b	a	a
OH02-16014	59.5	11.1	52.8	108.2	93.7	51.6	82.9	61.7	72.9	49.7	a	a	a	b	b	b	b	a	b	b	b	a	b	a	b	b	b	b	b	b	b	b	h	b	b	b	a	a	b	b	b	b	a	b	b	h	a	a	a
OH02-16015	58.4	9.7	52.7	74.3	69.4	49.8	78.8	61	73.2	54.5	a	a	a	b	b	b	h	a	b	b	b	b	a	b	b	b	b	b	b	a	a	a	a	b	b	b	a	a	h	b	b	a	h	b	b	h	b	b	b
OH02-16016	58.6	9.1	53.8	86.1	85.1	50.4	80.8	62.1	72.5	53.7	a	a	b	a	a	a	a	a	b	b	a	a	b	-	a	b	b	a	a	a	a	a	a	a	b	b	b	a	h	a	a	a	b	a	b	a	b	b	b
OH02-16017	57.7	10	53.5	100.9	93.7	52.5	86.1	64.4	70.3	53.5	a	a	b	a	a	a	a	a	a	a	a	a	a	a	a	a	b	a	a	a	a	b	h	b	b	a	a	b	b	b	b	b	a	b	b	b	b	b	a
OH02-16018	60.1	10	54.5	92.1	85.1	53.1	84.4	63.5	72.8	51.2	a	a	a	a	a	a	a	b	b	a	b	b	a	b	b	a	a	a	a	a	a	a	b	a	b	b	a	b	h	a	a	a	a	a	b	b	b	a	a
OH02-16019	58.1	9.7	54.6	87.4	82.7	51.1	82.3	62.6	72.5	53.4	a	b	a	a	a	a	a	a	b	b	a	b	a	a	a	b	b	a	a	a	b	b	a	a	b	b	a	a	h	a	a	a	b	a	b	a	b	b	b
OH02-16021	60.7	11.1	52.6	105.9	90.8	51.6	83.8	61.2	71.8	50.4	b	b	a	b	b	b	b	a	a	a	a	b	a	b	b	a	b	a	a	a	a	a	h	b	b	a	a	b	h	b	-	b	b	b	b	b	b	b	a
OH02-16022	58.4	10.3	54.3	85.3	76.1	51.4	83.1	64	72.5	54.5	a	a	b	a	a	a	a	b	b	b	b	b	a	b	b	b	b	b	h	b	a	a	a	b	b	.	a	h	b	b	b	b	b	b	b	b	a	a	a
OH02-16023	59.1	10.2	54.2	108.8	100.6	51.9	85.5	62.6	71.8	53.9	a	a	-	b	a	a	a	b	b	b	a	a	b	a	b	b	a	-	h	a	a	a	a	b	a	a	b	h	h	a	b	h	-	a	b	h	b	b	b
OH02-16024	56.1	9.9	54.2	85.4	79.2	50	81.9	61.9	73.1	54.7	b	b	b	b	b	b	b	a	b	b	b	a	a	b	b	b	b	b	a	a	b	b	a	b	a	a	a	a	a	a	a	a	a	a	b	a	a	a	a
OH02-16025	58.7	9.9	52.4	90.1	84	50.5	80.4	60	73.1	50.4	b	b	a	b	a	a	b	b	a	a	b	a	b	b	a	a	a	a	a	a	a	a	b	b	b	a	a	a	b	b	b	b	-	a	b	h	h	b	a
OH02-16026	58.4	10.4	52.2	99.4	89.7	49.4	79.1	59.4	72.2	51	b	b	b	b	a	a	b	b	a	a	b	a	a	a	a	a	a	b	b	b	b	a	a	b	a	a	a	a	b	b	-	b	h	-	b	h	b	b	b
OH02-16027	60	10.6	53	102.1	90.6	51.1	83.4	61	73.4	50.5	b	b	b	b	a	a	b	a	h	a	a	a	a	a	a	a	a	a	a	a	a	a	a	b	b	a	b	h	b	b	b	b	h	a	b	b	b	b	b
OH02-16028	59.1	10.5	53.2	98.8	88.5	49.8	79.4	61	73.8	49.5	b	b	a	b	b	b	b	b	b	a	-	a	-	a	b	a	a	-	-	-	-	b	a	a	a	b	b	h	a	h	-	-	-	a	b	a	-	a	-
OH02-16029	57.8	10.7	54.3	105.5	93.6	52.6	86.3	64.2	70.4	52.3	b	b	a	b	b	b	a	b	b	a	b	a	b	a	a	a	a	a	a	a	a	b	a	a	b	a	a	b	a	a	a	a	b	a	b	a	h	b	a
OH02-16030	56.5	10.8	54.6	96.4	84.2	53.5	86.3	64	71.5	51.2	b	b	a	b	b	b	b	a	a	b	b	a	-	a	a	b	b	b	b	a	b	b	a	-	b	a	a	h	b	b	b	-	b	b	b	a	a	a	a
OH02-16031	59	10.3	52.8	103.7	94.8	50.8	82	61	72.7	51.9	b	b	b	b	b	h	a	b	b	a	a	b	b	a	a	a	a	b	a	a	a	a	a	b	a	b	b	h	h	b	b	b	a	a	a	a	a	b	-
OH02-16032	58.3	10.3	53.4	107.3	98.1	51.9	84.3	62.4	71.3	51.8	b	b	a	b	b	b	b	b	a	a	a	a	a	a	a	a	a	-	a	a	a	b	b	b	b	-	a	a	b	b	b	b	b	b	b	h	h	b	a
OH02-16033	58.1	10.1	53.6	101.4	93.7	49.6	80.7	61.5	72.6	54.5	b	b	-	b	b	a	b	b	a	a	a	a	b	a	a	a	b	b	a	a	a	a	h	b	b	a	a	h	b	b	b	b	a	a	a	b	-	b	-
OH02-16034	57.5	10.9	54	86.2	73.2	52.1	82.7	61.7	72.7	51.8	a	a	a	a	a	a	a	a	b	b	b	a	b	b	b	b	b	a	a	a	a	b	a	b	b	b	a	b	a	-	b	b	a	a	b	a	a	a	a
OH02-16035	58.6	9.6	53.2	94.2	89.6	48.7	79.6	61.5	72.4	55.2	b	b	a	b	a	a	a	b	b	a	b	a	a	b	b	a	b	b	b	a	a	b	b	b	b	a	a	b	b	b	b	b	a	b	b	a	b	b	b
OH02-16036	58.5	9.9	53.2	80.6	74.2	50	80.6	61.3	72.8	53.2	b	b	b	b	b	a	b	b	b	b	b	a	a	b	b	b	b	b	b	b	a	a	a	b	b	b	a	a	b	b	b	b	a	b	b	b	b	b	b
OH02-16038	57.6	10.9	53	107.9	94.6	50.5	81.2	60	72.6	49.6	a	a	a	b	b	a	b	a	b	a	a	a	b	a	a	a	a	a	b	b	b	b	b	b	b	b	a	b	a	a	b	a	b	b	a	h	b	b	b
OH02-16039	58.8	10.4	52.4	100.2	90.7	49.7	79.1	58.1	73.6	47.1	a	b	-	b	b	b	b	b	b	b	a	a	b	a	b	b	b	b	a	a	a	b	b	a	a	b	b	b	a	b	b	b	h	b	b	a	a	a	a
OH02-16041	58.2	10.6	53	94.8	83.4	51.2	81.7	61.2	73.7	50	b	a	b	b	b	b	b	a	b	b	a	a	a	b	b	b	b	b	a	b	b	b	a	b	a	b	a	h	a	a	b	-	a	-	b	a	a	a	-
OH02-16042	57.7	10.4	53	88	78.1	49.9	79.9	59.7	72.9	51.4	b	a	b	b	b	b	b	a	a	b	b	a	a	a	a	b	b	b	b	b	a	a	b	b	a	b	a	h	h	b	b	b	h	a	b	a	a	a	a
OH02-16043	57.6	9.7	52.8	84.9	79.8	50.5	80.7	60.1	73.8	49.9	b	a	b	a	a	a	h	b	b	a	a	b	b	a	b	b	b	b	a	a	-	b	a	a	a	b	a	a	h	a	a	a	a	b	a	a	a	a	a
OH02-16044	58.2	10.2	54.1	89.9	81.6	51.2	83.7	62.7	72	52.7	b	b	-	b	b	b	b	-	b	b	-	b	b	-	-	-	a	b	-	b	b	b	h	-	a	b	a	h	h	b	-	-	-	a	a	-	-	a	-
OH02-16045	58.7	11.1	53.3	113.5	98.9	51.3	83.4	60	72.5	50.4	b	b	a	b	a	h	h	a	b	a	b	b	b	b	h	a	a	a	a	a	a	a	b	b	a	b	a	h	-	b	b	b	h	a	a	a	a	a	a
OH02-16046	58.5	10.4	54.7	88.5	78.2	52.3	85.4	64.6	70.1	54.7	a	a	b	a	b	a	b	a	b	b	-	b	a	b	b	b	b	a	h	a	a	b	h	b	a	-	a	a	b	b	b	b	h	b	b	a	b	b	a
OH02-16047	59.5	11.2	53.6	96.6	81.5	50.9	81.1	60.4	72.8	48.2	a	a	b	a	b	b	b	a	b	a	-	a	b	b	a	b	b	b	a	a	a	a	a	b	b	b	b	a	h	b	b	b	b	b	b	a	b	b	b
OH02-16048	58.7	9.8	52.5	106.1	101	50.3	83.6	61.6	72.1	54	b	b	b	b	a	a	a	b	a	b	-	a	b	b	a	a	a	a	a	a	a	b	a	a	b	a	a	a	h	a	a	a	h	a	b	a	a	a	a
OH02-16049	58.4	10	52.6	100.9	93.6	50.8	83.5	62.9	71.6	52.6	b	b	a	b	b	b	b	a	a	a	b	a	a	b	b	a	a	a	a	a	b	a	a	a	b	a	b	h	-	a	a	a	a	a	b	b	b	b	b
OH02-16050	58.8	10.7	54.2	100.7	89.2	52	85.7	62.8	71.8	51.6	a	a	-	a	a	h	h	-	b	a	-	b	a	b	b	a	a	a	-	b	a	b	a	b	a	b	b	h	-	b	-	b	h	b	a	-	a	a	-
OH02-16051	59.4	10.6	53.7	111.3	100.2	53.2	86.1	63.4	72.4	50.1	b	b	-	b	b	b	b	b	a	a	a	a	a	b	b	a	a	-	a	a	a	b	b	a	a	b	b	h	a	a	a	-	h	a	b	a	b	b	-
OH02-16052	58	10.3	52.3	101.6	92.1	49.9	80.3	59.5	73.1	52.4	b	b	-	b	b	a	b	b	b	a	b	a	a	a	a	a	a	-	b	b	b	a	b	b	a	a	b	a	a	b	a	b	h	a	b	h	b	b	b
OH02-16053	58.5	10.1	52	94.5	86.6	50.4	81.4	59.9	73.3	51.5	a	a	-	a	a	h	b	b	b	b	b	a	b	b	b	b	b	-	b	b	b	b	b	b	a	a	a	b	a	a	a	a	a	a	-	h	a	a	a
OH02-16054	58.8	10.2	53.5	94.5	86.7	50.8	84.7	62.8	71.8	54.4	b	b	a	b	-	b	h	b	a	a	b	a	a	a	a	a	a	b	b	b	b	a	b	a	b	b	a	a	-	b	b	a	h	b	a	b	b	b	a
OH02-16055	59.3	9.9	54.4	117.6	111.8	51.4	88.4	64.7	71.2	55.9	b	b	a	b	b	a	b	b	a	a	b	-	b	a	a	b	a	a	b	b	b	a	h	a	b	b	a	a	-	a	a	a	b	b	a	h	b	b	b
OH02-16056	57.8	9.9	53.6	99.4	93.1	50.7	82.4	62.2	71.8	53.2	b	b	a	b	a	a	a	a	a	b	a	a	b	a	a	a	a	a	b	a	a	a	b	a	b	b	a	a	a	a	a	a	b	a	a	a	a	a	b
OH02-16057	58.6	10.1	52.9	82.5	74.9	49.4	78.6	61	73.5	56.2	a	a	a	a	b	b	a	a	b	b	b	b	a	a	a	b	b	b	a	a	a	h	b	b	b	b	b	a	a	b	b	b	b	b	a	b	a	a	a
OH02-16058	58.2	10.2	53.9	101	92.6	51.4	82.1	61.2	73	51.9	b	b	b	b	a	h	b	b	b	a	b	a	b	a	a	b	a	a	b	b	a	b	b	b	b	b	b	a	b	b	b	b	a	b	a	b	b	b	b
OH02-16059	59.2	10.5	54.2	99.2	88.6	51.3	82.1	61.5	72.6	50.4	a	a	a	b	b	b	b	b	a	b	b	a	b	a	a	a	a	a	b	b	b	a	h	b	b	b	a	h	b	b	b	b	a	b	b	a	a	a	a
OH02-16061	57.7	9.7	54.4	91.5	86.8	51.8	83.7	63.9	71.6	54.8	b	b	a	b	a	h	h	b	b	b	b	a	b	a	a	b	b	a	a	a	a	a	b	a	b	b	b	b	b	a	a	-	a	a	b	a	a	a	a
OH02-16062	57.2	10.3	55.3	90.9	81.7	51.3	83.3	64.4	70.1	55.2	a	a	a	a	a	a	a	a	b	b	b	a	b	a	b	a	a	a	b	b	a	a	h	a	b	a	b	b	a	a	a	h	b	b	b	b	b	a	a
OH02-16063	59.8	10.3	55	78.8	69.9	52.2	82.6	63.9	71.2	52.1	a	a	a	a	b	b	a	b	a	b	a	-	a	b	b	b	b	b	b	b	b	b	b	b	b	b	a	b	b	b	b	b	b	b	a	a	a	a	a
OH02-16064	59	9.4	54.4	102.1	99.2	51.7	83.4	62.7	71.6	52.8	b	b	b	b	a	a	a	b	a	b	a	a	a	a	a	b	b	b	b	b	b	b	a	b	b	a	a	a	b	b	b	b	-	b	b	b	b	b	b
OH02-16065	57.3	10.3	55	91.1	82.3	51.5	85	63.6	70.5	54.6	a	a	a	a	a	b	a	b	a	b	h	b	b	b	a	a	b	b	b	b	b	b	a	a	b	b	b	a	a	a	b	a	b	b	a	a	a	a	a
OH02-16066	58.6	10.5	54.2	102.1	92.1	51.6	85.3	62.5	71.6	50.9	b	b	b	b	a	a	a	b	b	b	b	a	b	a	b	a	a	a	b	b	a	b	h	b	a	b	b	a	a	b	-	-	b	a	b	a	a	a	a
OH02-16067	58.4	10.3	52.8	87.1	78.1	49.7	79.3	61.4	72.6	51	b	b	b	b	b	b	h	b	b	b	b	a	b	a	b	a	a	a	a	a	b	b	a	b	a	a	a	h	a	h	b	h	-	a	b	a	b	b	b
OH02-16068	59.7	10.3	54.7	96.3	87.5	52.5	83.6	63.5	70.9	50.5	b	b	b	b	b	b	b	a	b	b	a	a	a	a	a	a	a	a	a	a	a	h	a	b	b	b	a	b	b	b	b	b	b	b	b	b	b	b	b
OH02-16069	58.2	10.6	53.8	98.5	87.4	50.3	82.3	60.4	72.9	52.1	b	b	b	b	b	a	b	a	b	b	b	a	b	a	a	a	a	a	a	a	b	b	-	b	b	b	a	h	a	b	b	a	b	-	b	a	a	a	-
OH02-16070	57.1	9.7	53.9	83.9	78.8	51.6	82.2	62.4	72	54.5	b	b	b	a	a	h	a	a	a	a	a	b	a	a	b	b	b	b	b	b	a	a	b	b	b	b	b	a	a	a	a	a	b	a	b	b	a	a	a
OH02-16071	59.5	9.5	51.4	99.5	96.4	49.7	81.2	60.3	73.5	52.6	b	b	b	b	b	b	b	b	b	a	b	a	b	a	b	a	a	b	a	a	b	a	b	a	a	b	b	b	a	a	a	-	a	a	b	a	a	a	a
OH02-16072	57.4	10.2	53.7	87.5	79.6	50.8	81.9	63.4	72.1	54.9	a	a	b	a	b	b	b	b	b	b	-	b	a	b	b	b	b	b	a	a	a	b	h	b	b	a	a	a	b	b	b	-	-	a	b	b	b	b	b
OH02-16073	57.8	9.7	54.5	95.5	91.2	51.4	85	64.6	70.2	57.8	a	a	a	a	a	a	a	b	a	a	-	-	-	b	b	b	b	a	b	a	a	a	a	a	b	b	a	b	h	a	a	a	-	a	b	h	b	b	a
OH02-16074	58.2	10.4	53.1	82.9	73.4	51.3	79.9	62.1	72.6	51.3	b	b	a	a	a	a	a	a	b	b	a	b	b	b	b	b	a	a	b	b	b	a	a	b	b	a	a	a	h	a	a	a	b	a	b	b	a	a	a
OH02-16075	58.9	10.1	51.1	102.8	95.1	50	79.6	59.5	73.2	48.7	b	b	b	b	b	b	b	b	b	b	-	a	b	a	a	a	a	a	a	a	a	b	h	a	b	b	b	b	a	b	b	a	a	a	a	a	a	a	a
OH02-16076	59.3	10.2	55.5	96.8	88.1	52	84.5	64.2	71.9	54.7	b	b	a	b	a	b	a	b	b	b	b	a	b	a	a	a	b	b	a	a	a	a	a	b	a	a	a	a	b	b	b	-	a	a	b	b	b	b	b
OH02-16077	59	10.4	53.8	94.1	84.5	51.8	82.3	63.7	71.5	54.1	b	b	a	a	a	a	a	a	b	b	a	b	b	b	b	b	a	a	b	b	b	h	a	a	b	a	a	a	a	a	a	h	b	a	b	b	h	a	a
OH02-16078	56.8	9.6	55.8	75.8	71.7	51.9	81.5	65.3	71	56.5	a	a	a	a	a	a	a	b	b	b	a	b	a	b	b	b	b	b	b	b	b	b	a	a	b	a	b	b	a	a	a	h	b	a	b	b	a	a	a
OH02-16081	58.8	10.8	53.4	94.9	82.5	52.4	82	62.6	72.7	48.7	b	b	a	b	a	a	a	a	a	b	b	b	a	a	b	a	a	b	b	b	b	b	b	b	b	a	a	h	b	b	b	h	b	b	a	-	b	b	a
OH02-16082	58.4	10.3	52.2	101.2	92.5	51.3	82	61	72.9	50.3	b	b	b	b	b	b	b	b	b	b	a	a	b	a	a	a	a	a	a	a	b	a	a	b	b	a	b	a	-	b	-	b	b	a	b	h	b	b	b
OH02-16083	58.8	10.1	52.7	88.5	80.8	50.7	81	60.9	72	53.1	b	b	b	b	a	a	a	b	a	b	b	a	b	a	a	a	a	a	a	a	a	h	a	b	b	b	a	a	h	b	b	b	b	b	a	b	b	b	b
OH02-16085	58.1	10.5	54.2	81.2	71	50.9	82.1	62.9	71.4	53.2	-	a	a	a	a	h	a	b	a	a	b	a	b	b	b	b	b	b	b	b	b	h	b	b	b	a	-	b	h	b	b	b	b	b	a	a	a	a	b
OH02-16086	57.2	10.9	53.2	91.5	78.3	50.1	80.5	60.7	72.4	51.3	b	a	b	b	a	b	b	a	a	b	b	a	b	a	a	a	a	a	a	a	b	b	a	b	b	a	a	a	b	b	b	b	b	b	b	b	b	b	b
OH02-16087	58.2	10.8	53	113.3	101	51.3	82.2	61	71.5	49.6	b	b	b	b	b	a	a	b	a	b	b	-	b	a	a	a	a	a	a	b	b	b	a	b	a	a	a	b	h	b	b	b	b	b	b	b	b	b	b
OH02-16088	59	9.3	52.4	85.9	83.6	50.4	80.3	60.5	73.7	51.3	a	a	a	a	a	b	b	b	b	b	a	a	a	b	b	a	a	b	b	b	a	b	-	-	b	a	b	a	b	b	b	b	a	a	b	b	b	b	b
OH02-16089	57.5	10.3	54.8	92	82.9	52.2	86.3	65.1	70.1	54.9	a	a	a	a	a	a	a	b	b	a	b	b	a	b	b	b	b	b	b	b	b	b	a	a	b	b	a	a	b	b	b	b	a	b	b	b	b	b	b
OH02-16090	58.6	10.4	52.4	95.6	85.9	49.8	81.2	60.1	73.3	52.4	a	a	a	a	a	a	a	a	b	b	a	-	b	a	a	b	a	a	a	a	a	a	h	a	b	b	b	h	a	b	b	b	b	-	b	a	a	a	-
OH02-16091	57.5	10.7	54.8	104.1	92.4	51.8	85.4	63.8	72.2	51.4	b	b	a	b	b	b	b	b	h	b	a	a	b	a	a	a	a	a	a	a	a	a	b	b	b	a	a	a	-	b	b	b	-	a	b	b	-	-	a
OH02-16092	58.1	10.3	54.1	98.3	89.5	52.1	86.4	65	69.9	54.8	a	a	b	a	b	b	b	a	b	b	b	.	-	-	a	a	a	b	h	b	-	b	b	a	b	b	a	b	a	h	b	a	b	b	b	a	b	b	b
OH02-16093	57	10	56.2	97.4	90	53.5	88.8	67.4	69.9	56.6	a	a	a	a	b	h	a	b	b	a	a	b	b	b	b	b	b	b	b	b	b	b	b	b	b	a	a	b	b	b	b	b	-	b	b	b	a	a	a
OH02-16094	57.3	9.9	54.4	105.1	98.8	51.5	86.7	64.3	71.2	53.8	a	a	b	b	b	a	b	b	b	b	b	a	a	a	a	a	a	a	b	b	b	b	h	a	a	a	b	b	a	h	b	a	a	b	b	a	a	a	a
OH02-16095	59	10.3	53.3	96	86.8	51.4	83.5	61.8	71.2	52.4	b	b	b	b	b	a	h	b	b	b	b	a	b	b	b	a	a	b	a	a	b	b	b	b	a	a	b	h	a	b	b	a	-	b	b	a	a	a	a
OH02-16096	59.6	10.7	54.7	103.4	91.4	53.3	86.9	65.4	69.3	50.8	a	a	a	a	b	b	h	b	b	b	b	a	a	a	a	a	a	a	b	b	b	b	h	a	b	b	a	h	h	a	b	a	b	b	b	a	a	a	a
OH02-16097	59.1	10.3	56	86.7	77.5	54.6	87.8	66.9	69.9	54	a	a	-	a	a	a	a	b	-	b	a	a	-	b	-	b	b	b	-	b	b	b	b	-	b	b	b	a	h	b	-	b	-	b	a	b	b	b	b
OH02-16098	58.4	10.5	53.1	95.8	85.3	49.7	81.4	60.6	73.1	51.4	a	a	b	a	b	a	h	b	-	b	-	a	b	a	b	b	b	b	a	a	b	b	b	b	b	b	b	a	a	b	b	b	-	a	a	a	a	a	a
OH02-16099	59.1	9.3	55.1	106.7	104.4	52.2	85.9	65.3	70.9	56.9	a	a	a	a	b	b	b	b	-	b	a	a	-	b	b	b	b	a	a	a	b	a	h	a	b	b	b	h	a	a	a	a	h	b	a	b	b	b	b
OH02-16101	58.2	9.6	56.8	76.8	72.7	52.6	83.6	66.3	70.8	56.3	a	a	a	a	a	h	a	b	h	a	b	a	b	b	b	b	b	b	b	b	b	b	b	b	b	a	a	b	b	b	b	b	a	b	b	b	b	b	b
OH02-16102	58.7	10.9	52.5	97.4	84.5	50.8	83.9	60.9	72.6	51.4	a	a	a	a	b	a	b	a	b	a	a	a	b	b	a	b	a	a	a	a	b	b	h	b	a	b	a	a	a	b	-	-	-	a	b	a	a	a	a
OH02-16103	58.4	9.3	52.5	103.1	101.1	50.2	82.2	61.2	72.9	55.3	b	a	b	b	b	b	b	a	b	b	b	a	b	a	a	a	a	a	a	a	a	a	h	a	a	b	a	h	a	a	a	a	a	a	b	b	b	b	b
OH02-16104	57.8	10.6	53.9	100.5	89.5	52.7	84.7	63.2	71.7	50.5	b	b	b	b	a	h	a	b	h	b	a	a	a	a	a	a	a	a	a	a	b	b	a	b	a	-	a	a	b	b	a	b	b	b	a	a	a	a	a
OH02-16105	59.6	11.1	53.7	103.1	88.1	51.7	82.8	61.5	73.3	49.5	a	a	b	b	a	h	h	b	b	a	b	a	a	a	b	a	a	b	b	a	a	a	a	b	a	b	b	a	h	b	b	-	-	b	-	a	a	a	a
OH02-16106	59.1	11	55.1	105	91	52.6	86.2	64.1	72.2	52.7	b	b	a	a	a	-	-	b	-	b	a	a	b	a	a	b	a	-	a	a	a	-	a	b	a	b	a	h	a	b	b	-	-	b	-	a	a	a	-
OH02-16107	58.7	10	53.9	87.6	80.5	51	82.7	62.1	71.5	54	b	b	a	b	a	b	a	a	a	b	b	a	b	b	b	a	a	a	a	b	b	b	a	b	b	a	b	b	h	b	b	b	a	b	b	a	a	a	a
OH02-16108	57.4	10	53.3	104.3	97.5	52.8	84.5	63.5	71.7	49.4	b	b	a	b	b	h	b	b	a	b	b	a	b	a	b	a	a	a	h	a	a	h	a	b	a	a	b	a	a	h	b	a	b	b	b	a	a	a	-
OH02-16109	58.6	10.3	53.7	83.8	75.1	51.5	82	63.3	73	53.3	b	b	a	a	a	h	a	a	b	b	a	b	a	b	b	b	a	a	h	b	a	b	b	b	b	b	a	a	a	b	b	b	a	a	b	a	b	b	b
OH02-16110	59.1	10.6	54.2	80.6	69.5	51.8	83.3	63.1	72.6	49.9	a	a	a	b	b	b	b	a	a	b	b	a	b	a	b	b	b	b	b	a	a	a	b	b	b	a	a	a	b	b	b	b	b	b	b	a	a	a	a
OH02-16111	59.8	10.1	53.6	91.9	84.6	51.1	81.6	63	72.9	53.7	b	b	b	a	h	a	b	b	a	b	a	b	b	b	b	b	a	a	h	a	a	a	h	b	b	b	a	a	b	b	b	b	a	b	b	b	b	b	a
OH02-16112	58	10.8	54.7	77.6	64.9	53	82	63.6	72.2	51.1	a	a	b	a	h	b	b	b	b	b	a	b	a	b	b	b	b	b	b	b	b	b	h	b	b	a	a	a	b	b	b	b	b	b	b	a	a	a	a
OH02-16113	59.4	10.6	53.7	116.2	104.9	52.9	87.5	63.9	70.3	54.1	a	a	a	a	b	h	b	b	h	b	a	a	b	a	a	b	b	a	h	a	a	a	-	b	b	b	a	h	a	b	b	h	h	b	b	b	b	b	-
OH02-16115	58.7	10	53.7	96	89.2	51.7	84.3	63.2	71.6	52.8	a	a	b	b	b	b	b	b	b	b	b	a	b	a	b	a	a	a	a	h	h	a	h	a	a	a	b	h	a	a	a	a	b	a	b	b	b	b	b
OH02-16116	58.9	9.9	53.8	87.7	81.5	50.8	83	63.1	71.5	53.7	b	h	a	a	b	a	a	b	h	b	b	b	a	a	a	b	b	a	b	b	b	b	a	b	b	a	a	a	b	b	b	b	b	-	-	b	b	b	b
OH02-16117	58.1	9.8	54.6	96.1	90.3	51.4	85.1	64.2	70.6	55.1	a	a	a	b	a	a	a	a	b	b	b	a	b	a	a	b	b	b	b	b	a	b	a	a	b	a	a	a	b	a	a	a	a	b	b	b	b	b	b
OH02-16118	59.7	11.2	53.5	102.9	87.3	51.9	84.6	63.4	71.7	51	a	a	b	a	b	b	b	b	b	b	a	b	a	a	a	b	b	b	b	b	a	a	h	b	b	a	a	a	h	b	b	b	b	a	a	b	b	a	a
OH02-16119	59.4	10.4	53.6	89.5	80	51.5	82.3	60.9	73.3	51.8	b	b	-	b	-	b	b	b	-	a	-	-	-	a	-	a	a	b	b	b	b	b	-	-	a	b	b	a	h	b	-	-	-	-	b	-	-	-	-
OH02-16121	58.2	10.2	54.2	78.5	70.2	51.7	82.8	63.8	72.1	52	b	b	a	a	b	b	b	a	b	b	a	b	a	b	b	b	a	a	a	a	a	h	b	b	b	b	a	a	h	b	b	-	b	a	b	b	b	b	b
OH02-16122	60.3	10.3	56.6	90.4	81.4	54.9	89.7	69.4	70.7	53	a	a	a	a	a	a	a	-	b	b	b	a	b	b	b	b	b	b	b	b	b	b	h	a	a	b	a	h	h	a	a	a	-	a	b	a	b	b	a
OH02-16123	59.6	9.5	53.6	80.1	76.8	51.8	83.2	63.1	72.8	52.8	a	b	a	a	a	a	b	b	a	b	b	b	b	b	b	b	a	a	a	a	a	-	a	a	b	b	b	b	-	a	a	a	-	a	b	a	a	a	a
OH02-16124	58.4	10.2	52.1	88.1	79.2	50.9	81.1	60.6	72.2	51.9	b	b	a	b	a	a	b	a	b	a	b	a	b	h	a	a	a	a	b	b	b	b	a	b	b	a	a	a	b	b	b	b	a	b	b	a	a	a	a
OH02-16125	59.6	11	54	74.7	60.7	52.1	83.9	63.8	71.9	51.6	a	a	a	a	a	a	a	b	b	b	b	b	a	b	b	b	b	b	b	a	a	a	a	b	b	a	a	h	h	b	b	b	b	b	b	a	a	a	-
OH02-16126	59	9.9	54.5	77.6	71.4	51.7	83.1	62.7	71.6	51.1	b	b	a	b	b	h	b	b	b	b	b	b	a	a	a	a	a	b	b	b	b	a	a	b	a	a	b	h	h	b	b	b	b	b	b	a	a	a	a
OH02-16127	59.3	10.1	56.9	87.2	79.7	52.4	88.2	68.4	71	57.5	a	a	b	a	a	a	a	b	b	b	a	a	a	b	b	b	b	b	b	b	b	b	a	b	b	a	b	a	h	h	-	a	a	b	b	b	b	b	b
OH02-16128	57.2	10.7	51.5	106.7	94.5	49.4	81.5	59.1	71.7	54.1	b	b	a	b	b	b	b	b	a	b	b	a	a	a	a	a	a	a	b	b	b	b	b	b	b	b	b	b	h	b	b	b	h	b	a	b	b	b	b
OH02-16129	60.2	11.1	55.7	103.8	89	53.6	86.5	66.2	71.1	50.6	a	a	b	a	b	a	b	b	b	b	b	a	a	b	b	b	b	b	a	a	a	a	a	b	b	a	a	b	b	b	b	b	a	b	b	b	b	a	a
OH02-16130	58	10.7	53.3	117.6	105.7	52	87.2	64.6	70.2	55.3	b	b	a	b	b	a	b	a	b	a	a	b	b	a	a	a	a	a	b	b	b	b	b	b	b	a	b	a	-	b	b	b	b	b	b	b	b	b	b
OH02-16131	57.5	10.3	53.9	96.1	87.4	50.8	83.5	62.1	70.9	52.8	b	a	b	b	b	h	b	b	b	b	b	.	b	a	a	b	b	a	a	a	a	a	a	b	b	a	a	h	a	b	b	b	a	a	a	b	b	b	b
OH02-16132	59.1	10.2	54.3	94	85.5	50.5	83	63	71.7	55.5	b	b	b	b	b	h	b	b	b	b	b	a	a	a	a	a	b	b	b	b	a	a	b	b	b	b	b	b	a	h	b	a	a	a	b	b	b	b	b
OH02-16133	58.4	10.8	52.6	107.3	94.9	50.7	84.5	61.5	72.3	50.9	b	a	b	b	a	a	a	a	b	a	a	a	b	a	a	a	a	a	a	a	a	b	h	b	a	b	b	b	a	b	b	a	a	a	b	a	a	a	b
OH02-16134	57.5	10.6	51.9	93.3	82.1	49.5	78.9	58.3	73.8	49.3	b	b	b	b	b	b	b	a	b	a	a	a	b	b	b	a	b	b	a	a	a	b	a	b	a	a	a	h	b	b	b	-	-	a	b	a	a	a	-
OH02-16135	58.2	11.1	54.2	106.3	91.5	50.6	83.1	62.3	72.4	49.3	b	a	b	b	b	a	b	b	a	a	b	a	a	b	a	a	a	a	a	b	b	b	a	b	a	b	a	a	h	b	b	a	b	a	b	a	a	a	-
OH02-16136	57.8	10.2	54.1	86.3	77.7	50.6	79.7	62.3	72.7	53.8	a	a	a	a	b	h	a	b	a	b	b	a	b	b	b	b	b	a	b	a	a	a	a	b	b	b	a	h	h	b	b	b	a	a	a	b	b	b	-
OH02-16137	59.1	10.2	53.5	107.1	98.9	51.5	84.2	62	70.7	52.5	b	b	a	b	b	b	a	a	a	a	b	a	b	b	b	a	a	a	a	a	b	b	a	a	b	b	a	b	a	a	a	a	a	-	b	a	a	a	a
OH02-16138	59.7	10.9	54	96.9	84	52.2	85.7	62.8	70.5	51.7	b	b	b	b	b	a	a	a	b	b	a	a	a	a	b	b	b	b	b	b	b	b	a	b	b	a	b	b	b	b	b	b	a	a	b	a	a	a	a
OH02-16139	59.5	9.9	52.1	104.7	98.3	51	83.2	62	72	51.1	a	a	a	b	a	h	a	b	b	a	a	a	a	a	a	a	a	a	a	b	b	b	b	a	b	b	a	b	a	a	a	a	b	a	b	a	a	a	b
OH02-16141	58.4	10.2	56.2	89.4	80.9	52.7	88.2	66.9	69.3	57.2	b	b	a	b	a	a	b	a	a	b	b	b	b	b	b	b	b	b	b	a	a	a	a	a	a	a	a	b	a	a	-	a	-	b	b	b	b	a	a
OH02-16142	60	10.8	55.5	84.9	72.4	53.6	86.5	64.7	70.4	50.6	b	b	b	a	b	h	a	a	b	b	a	b	b	b	b	b	b	b	b	b	b	b	a	b	b	b	b	b	b	b	b	b	h	a	b	a	a	a	a
OH02-16143	58.6	10.6	54.6	112.9	101.8	52.6	86.9	63.2	70.8	54.6	b	b	b	b	a	a	b	a	-	a	b	a	a	a	a	a	a	a	b	b	b	b	b	b	b	a	a	a	h	b	b	b	b	a	b	b	b	b	b
OH02-16144	58.6	9.4	53.1	87.7	84.9	51.3	80.7	61.4	73.1	51	a	a	b	b	b	a	b	a	h	b	a	a	b	a	a	b	b	b	b	b	b	b	h	b	b	b	b	a	h	b	b	b	a	b	b	b	b	b	b
OH02-16145	58.2	9.6	56.4	80.1	76.2	52.9	86.6	65.4	69.8	55.8	b	b	a	a	a	b	a	b	b	b	h	a	b	b	b	b	b	b	b	b	b	b	h	a	b	b	a	a	a	a	a	a	b	a	b	a	b	b	a
OH02-16146	57.8	10.3	54.7	83.8	74.6	51.7	83.2	64.1	71.5	54.2	a	a	a	a	b	b	b	b	b	b	b	b	b	b	b	b	a	a	a	a	a	b	h	b	a	a	a	h	b	b	b	b	h	a	b	a	a	a	a
OH02-16147	59.6	9.8	55.9	91.3	86.1	54	87.3	66.9	69.6	53.9	a	a	b	a	a	a	a	a	b	b	a	a	b	b	b	b	b	b	b	a	a	a	h	a	b	a	a	b	a	a	b	a	h	b	b	b	b	a	a
OH02-16148	57.4	10.8	55.7	100.8	88.6	52.3	86	64.4	70.2	52.9	a	a	b	b	b	a	b	b	a	b	a	a	a	a	a	b	b	a	a	a	a	a	a	b	b	b	b	b	a	b	b	b	h	b	a	b	b	b	a
OH02-16149	58.5	10.2	55	94.7	86.5	52.2	85.4	64.7	71.3	55.5	b	b	b	b	b	b	h	a	a	b	a	a	a	a	a	a	a	a	a	a	a	a	b	b	b	b	a	a	b	b	b	b	a	a	a	b	b	b	b
OH02-16150	59.7	9.9	52.7	87.9	81.7	49.7	81.6	60.7	71.7	53	b	a	b	a	a	a	a	b	b	b	a	a	b	b	b	b	b	b	b	b	b	a	a	b	a	b	a	a	h	b	b	b	b	a	b	b	b	a	a
OH02-16151	58.9	9.2	53.5	95.7	94.6	50.7	82.2	61.8	72.6	54.1	b	b	a	b	b	b	h	-	b	a	b	a	b	a	a	a	b	b	b	b	b	b	a	b	a	b	a	b	b	b	b	b	h	b	b	b	b	b	b
OH02-16152	58.7	11	54.5	94.9	81	51.9	86.5	63.3	70.7	52.7	b	b	a	a	b	b	b	a	b	b	b	a	a	b	a	b	b	b	a	a	b	a	a	b	a	a	a	a	h	b	-	b	h	b	b	b	b	b	a
OH02-16153	56.8	10.3	53.9	80.6	71.3	50.6	79.8	61.3	73	53.3	b	b	a	a	a	b	h	b	a	b	b	a	a	b	b	b	b	b	b	h	a	b	a	b	a	b	a	h	h	b	b	b	a	a	b	h	h	b	a
OH02-16154	58.7	10	52.5	96.2	89.6	51	82.2	60.2	73.7	50.7	a	a	b	b	b	a	b	b	b	a	b	-	b	b	b	a	a	a	a	a	a	b	h	b	a	a	b	a	b	h	b	b	h	a	b	a	a	a	a
OH02-16155	57.2	10.1	55.9	79.8	72.2	51.8	83.5	64.8	71.9	56.9	b	b	a	a	a	a	a	a	b	b	b	a	a	b	a	b	b	b	b	b	b	b	h	b	a	a	a	h	h	h	b	b	h	a	b	b	b	b	a
OH02-16156	58	9.6	54.8	79.2	75.1	52.1	83.7	64	70.4	55.4	b	b	a	a	a	a	a	b	b	b	a	a	a	b	b	b	b	b	b	b	b	b	a	a	a	a	a	h	h	a	b	h	b	a	a	b	a	a	a
OH02-16157	58.7	10.7	52.1	109.8	98.2	51.1	83.5	60.2	70.8	50.8	b	b	a	b	b	a	b	b	a	a	a	a	a	a	a	a	a	a	h	a	a	a	a	a	b	a	a	a	h	b	b	b	b	a	b	a	a	b	b
OH02-16158	58	10.2	53	94.7	86.2	51.6	80.9	60	74.3	47.1	a	a	-	a	b	b	b	a	a	b	b	a	b	a	a	a	a	b	a	a	a	a	h	b	b	b	a	a	-	b	b	-	a	a	b	a	a	a	a
OH02-16161	59	10.15	53.54	96.14	88.02	52.15	86.2	63.95	70.9	51.51	a	b	-	b	-	-	-	-	-	a	h	-	-	-	a	a	b	b	a	a	-	-	b	b	a	a	a	b	b	b	-	-	a	a	b	-	-	-	a
OH02-16162	58.73	10.76	56.07	107.56	95.4	54.23	90.53	67.29	69.07	53.36	b	b	-	b	-	-	-	-	-	a	a	-	-	-	a	h	h	a	a	a	-	-	b	b	a	b	b	b	h	b	-	-	b	b	h	-	-	-	a
OH02-16163	57.42	10.27	53.98	99.88	91.19	51.05	84.3	63.5	69.74	54.57	b	a	-	a	-	-	-	-	-	a	a	-	-	-	a	a	a	a	b	b	-	-	a	b	b	b	b	-	b	b	-	-	b	b	b	-	-	-	a
OH02-16164	59.49	10.52	53.47	107.81	97.14	51.8	85.57	62.52	71.15	50.47	b	b	-	a	-	-	-	-	-	a	a	-	-	-	a	a	h	b	b	b	-	-	a	b	a	b	b	b	b	b	-	-	-	a	b	-	-	-	a
OH02-16165	59.65	10.14	53.93	99.46	91.53	51.19	84.17	62.48	71.13	51.12	-	b	-	a	-	-	-	-	-	b	a	-	-	-	a	h	h	b	a	b	-	-	b	b	a	a	-	h	b	b	-	-	a	a	a	-	-	-	b
OH02-16166	56.38	10.36	54.06	100.66	91.39	49.67	83.65	62.95	72.68	55.52	a	b	-	a	-	-	-	-	-	a	a	-	-	-	a	h	h	a	-	b	-	-	a	b	b	b	a	h	-	b	-	-	a	b	a	-	-	-	b
OH02-16167	57.77	10.57	52.63	110.12	99.34	51.63	85.73	62.78	71.31	52.37	h	b	-	a	-	-	-	-	-	a	a	-	-	-	a	h	b	b	b	a	-	-	b	b	b	a	h	a	b	b	-	-	b	a	b	-	-	-	b
OH02-16168	57.31	9.52	54.61	93.92	90.49	51.85	86.02	65.11	71.57	55.76	a	a	-	a	-	-	-	-	-	b	a	-	-	-	a	h	a	b	b	h	-	-	b	a	b	a	a	a	h	a	-	-	b	b	b	-	-	-	b
OH02-16169	60.25	10.49	55.43	122.95	112.66	54.45	90.41	65.35	70	50.32	a	a	-	b	-	-	-	-	-	a	a	-	-	-	a	a	h	b	a	b	-	-	b	-	b	a	a	b	b	a	-	-	a	a	b	-	-	-	a
OH02-16170	58.35	9.96	54.42	81.54	74.99	51.73	87.05	64.56	71.44	54.63	a	a	-	b	-	-	-	-	-	a	a	-	-	-	b	b	a	b	b	b	-	-	b	b	a	b	a	b	b	b	-	-	b	a	a	-	-	-	a
OH02-16171	59.14	10.42	53.15	98.08	88.16	51.83	82.12	61.97	72.65	47.19	a	b	-	b	-	-	-	-	-	a	a	-	-	-	a	a	h	a	a	a	-	-	b	b	b	b	a	h	b	b	-	-	a	b	a	-	-	-	b
OH02-16172	58.36	10.15	53.54	85.83	77.92	51.14	84.72	62.56	72.14	53.07	a	a	-	b	-	-	-	-	-	b	a	-	-	-	a	h	a	a	h	a	-	-	b	b	a	b	a	h	b	b	-	-	b	a	b	-	-	-	a
OH02-16173	58.84	9.15	54.4	102.98	101.95	51.56	86.98	65.78	70.49	56.15	b	b	-	b	-	-	-	-	-	b	b	-	-	-	a	a	h	a	a	a	-	-	b	a	a	a	b	b	a	a	-	-	h	b	b	-	-	-	b
OH02-16174	59.12	9.75	53.4	109.68	104.53	50.92	85.28	62.35	71.12	52.87	b	-	-	a	-	-	-	-	-	b	a	-	-	-	a	a	a	a	b	b	-	-	b	h	a	b	b	b	h	b	-	-	a	a	a	-	-	-	a
OH02-16175	59.58	10.66	53.22	111.62	100.14	51.4	84.88	63.01	71.61	50.93	a	a	-	b	-	-	-	-	-	a	h	-	-	-	a	a	a	b	b	a	-	-	a	h	b	a	a	a	h	b	-	-	b	b	a	-	-	-	a
OH02-16176	58.81	10.08	56.51	122.3	114.76	53.88	93.39	68.59	69.26	55.19	h	b	-	b	-	-	-	-	-	a	a	-	-	-	a	a	a	a	b	b	-	-	a	a	b	b	h	b	b	a	-	-	b	b	b	-	-	-	a
OH02-16177	57.06	10.24	55.71	97.52	88.76	53.55	86.87	67.48	70.01	52.22	a	a	-	b	-	-	-	-	-	b	a	-	-	-	a	a	a	b	a	a	-	-	b	a	b	b	a	b	h	a	-	-	h	b	b	-	-	-	b
OH02-16178	58.99	10.51	53.28	99.1	88.54	51.38	84.87	62.44	71.42	51.8	a	b	-	a	-	-	-	-	-	b	a	-	-	-	a	a	a	a	b	a	-	-	a	b	a	b	a	b	b	b	-	-	b	a	b	-	-	-	a
OH02-16179	58.25	10.91	55.9	96.45	83.16	53.87	88.15	67.03	70.07	53.46	b	b	-	b	-	-	-	-	-	b	a	-	-	-	b	b	b	a	b	b	-	-	a	b	b	b	b	b	b	b	-	-	a	b	h	-	-	-	b
OH02-16181	56.98	9.85	54.38	105.36	99.5	52.85	86.52	63.56	70.83	53.74	b	b	-	b	-	-	-	-	-	a	a	-	-	-	a	a	a	a	a	b	-	-	a	b	a	a	b	b	b	b	-	-	h	b	a	-	-	-	b
OH02-16182	59.67	9.93	52.9	106.59	99.99	49.46	82.83	61.29	71.07	52.41	b	a	-	b	-	-	-	-	-	a	b	-	-	-	a	a	a	b	a	b	-	-	a	b	b	a	b	b	b	b	-	-	h	b	b	-	-	-	b
OH02-16183	57.77	9.85	54.89	95.15	89.11	51.17	87.69	65.68	69.78	56.3	b	b	-	b	-	-	-	-	-	b	h	-	-	-	b	b	a	b	b	b	-	-	b	a	b	h	b	b	a	a	-	-	b	a	b	-	-	-	b
OH02-16185	58.27	10.48	54.59	105.65	95.39	52.53	89.35	64.97	70.18	52.85	h	b	-	b	-	-	-	-	-	b	a	-	-	-	b	b	a	b	b	b	-	-	a	b	b	a	h	b	b	.	-	-	a	b	a	-	-	-	a
OH02-16186	57.06	9.8	53.53	99.64	94.15	50.29	84.05	62.49	70.29	56.06	h	b	-	a	-	-	-	-	-	b	b	-	-	-	a	a	a	b	a	a	-	-	a	h	b	a	h	b	b	b	-	-	a	a	a	-	-	-	b
OH02-16187	57.68	9.91	52.86	87.55	81.26	51.07	82.55	61.79	73.54	52.91	b	a	-	b	-	-	-	-	-	a	h	-	-	-	a	a	b	b	b	h	-	-	h	b	b	b	b	b	a	b	-	-	b	b	a	-	-	-	b
OH02-16188	60.27	10.2	53.1	102.04	93.78	52.03	84.63	62.91	72.21	50.27	b	h	-	b	-	-	-	-	-	a	a	-	-	-	a	a	b	a	a	b	-	-	b	b	a	b	b	h	b	b	-	-	b	a	a	-	-	-	b
OH02-16189	59.59	9.74	54.05	89.93	84.87	51.02	85.75	64.24	71.57	52.52	a	a	-	b	-	-	-	-	-	b	a	-	-	-	a	a	b	a	h	a	-	-	a	b	b	a	a	h	b	b	-	-	a	b	a	-	-	-	a
OH02-16190	57.49	10.15	55.82	94.05	85.9	52.47	84.76	65.37	70.37	57.69	b	b	-	a	-	-	-	-	-	b	a	-	-	-	a	b	a	b	b	a	-	-	b	a	b	b	b	h	a	a	-	-	b	b	b	-	-	-	b
OH02-16191	59.16	10.11	52.97	105.57	97.7	50.16	82.57	60.61	72.3	50.61	a	b	-	b	-	-	-	-	-	b	h	-	-	-	a	a	b	a	h	b	-	-	a	b	b	b	a	h	b	b	-	-	a	a	-	-	-	-	b
OH02-16192	59.5	9.29	54.08	103.93	102.04	52.05	86.38	64.06	71.33	51.9	a	b	-	a	-	-	-	-	-	b	a	-	-	-	a	a	a	b	a	b	-	-	h	a	a	a	a	b	a	a	-	-	b	b	b	-	-	-	a
OH02-16193	59.42	9.93	55.06	89.23	82.79	51.33	84.7	63.58	71.39	54.13	b	b	-	b	-	-	-	-	-	b	a	-	-	-	a	b	a	a	a	b	-	-	a	b	a	h	b	a	b	b	-	-	b	a	b	-	-	-	b
OH02-16194	59.08	10.49	54.57	93.71	83.37	52.7	87.62	64.93	71.3	50.84	b	b	-	a	-	-	-	-	-	a	b	-	-	-	a	a	a	b	a	a	-	-	b	b	a	b	b	a	b	b	-	-	a	a	a	-	-	-	b
OH02-16195	59.32	9.6	52.83	109.15	105.14	50.6	84.73	61.71	71.54	53.94	b	b	-	b	-	-	-	-	-	b	a	-	-	-	a	h	h	a	b	b	-	-	a	h	b	a	b	h	a	b	-	-	a	a	b	-	-	-	b
OH02-16196	59.19	10.49	53.71	113.31	102.95	52.29	86.73	63.21	73.03	47.25	a	a	-	b	-	-	-	-	-	b	a	-	-	-	a	a	h	a	a	a	-	-	b	h	a	a	a	a	h	b	-	-	b	b	b	-	-	-	-
OH02-16197	58.91	10.16	52.42	95.89	87.89	50.6	82.8	61.14	72.97	49.41	b	b	-	b	-	-	-	-	-	b	-	-	-	-	a	a	b	b	a	a	-	-	a	b	b	b	b	b	b	b	-	-	a	a	a	-	-	-	b
OH02-16198	57.05	10.62	56.15	92.91	81.61	53.25	93.12	68.82	68.39	56.56	h	b	-	a	-	-	-	-	-	a	b	-	-	-	b	b	a	a	b	b	-	-	a	b	b	b	h	b	b	b	-	-	b	a	a	-	-	-	b
OH02-16199	59.28	9.98	53.84	91.27	84.36	51.07	83.44	61.81	72.65	52.62	b	b	-	b	-	-	-	-	-	b	b	-	-	-	a	b	b	b	b	b	-	-	b	b	a	a	b	h	a	b	-	-	a	a	a	-	-	-	b
OH02-16201	59.44	10.27	55.13	98.41	89.63	52.95	88.88	65.18	70.62	53.23	a	b	-	a	-	-	-	-	-	a	a	-	-	-	a	h	b	b	h	a	-	-	a	b	a	h	a	b	b	b	-	-	b	a	a	-	-	-	b
OH02-16202	59.96	10	54.86	93.88	87.12	52.33	84.58	63.58	70.18	48.85	b	b	-	b	-	-	-	-	-	a	b	-	-	-	a	h	b	a	a	b	-	-	b	b	b	a	b	b	h	b	-	-	a	a	a	-	-	-	a
OH02-16203	58.59	9.56	52.79	103.18	99.25	48.94	83.68	61.79	71.01	55.77	h	b	-	a	-	-	-	-	-	b	a	-	-	-	a	h	a	b	h	a	-	-	b	b	b	b	h	a	h	b	-	-	b	a	a	-	-	-	b
OH02-16204	57.49	9.33	54.42	104.69	102.49	52.25	87.86	65.38	70.18	55.14	a	a	-	a	-	-	-	-	-	b	a	-	-	-	a	a	b	b	h	b	-	-	b	a	a	b	a	b	h	a	-	-	a	b	a	-	-	-	b
OH02-16205	57.71	9.64	54.23	101.58	97.08	51.75	86.82	63.92	70.69	52.65	a	b	-	b	-	-	-	-	-	b	a	-	-	-	a	a	b	a	h	a	-	-	a	a	a	b	a	-	h	a	-	-	h	b	a	-	-	-	b
OH02-16206	57.57	9.96	55.36	102.29	95.64	52.73	89.05	65.88	69.46	55.65	b	b	-	b	-	-	-	-	-	a	a	-	-	-	a	a	b	a	b	b	-	-	b	a	a	a	b	b	h	h	-	-	h	a	b	-	-	-	b
OH02-16207	57.92	9.88	53.83	95.56	89.34	50.85	85.2	63.87	70.31	56.05	h	a	-	a	-	-	-	-	-	a	a	-	-	-	a	b	a	a	b	a	-	-	b	b	a	a	h	b	b	b	-	-	a	b	a	-	-	-	b
OH02-16208	57.62	10.27	53.66	108.91	100.05	51.33	86.79	64.34	70.08	53.21	b	b	-	b	-	-	-	-	-	a	a	-	-	-	a	a	a	b	a	b	-	-	b	b	a	b	b	b	b	b	-	-	a	b	b	-	-	-	b
OH02-16209	59.18	10.42	54.38	114.07	104.13	51.9	88.46	64.5	70.74	53.09	a	a	-	a	-	-	-	-	-	b	a	-	-	-	a	a	a	b	b	b	-	-	b	b	a	a	a	b	b	b	-	-	a	b	a	-	-	-	a
OH02-16210	58	9.66	59.6	102.14	97.55	54.22	92.97	71.88	68.91	61.05	b	b	-	a	-	-	-	-	-	a	a	-	-	-	b	b	a	a	b	b	-	-	a	b	a	a	b	b	b	b	-	-	b	a	a	-	-	-	b
OH02-16211	58.95	10.56	55.04	95.95	85.07	53.33	87.16	64.12	71.17	52.5	a	b	-	a	-	-	-	-	-	a	a	-	-	-	b	a	a	b	b	a	-	-	b	b	-	a	a	b	b	b	-	-	b	b	a	-	-	-	b
OH02-16212	56.91	10	59.86	86.6	79.63	51.87	85.53	65.12	71.96	56.45	h	b	-	b	-	-	-	-	-	b	a	-	-	-	b	b	b	h	a	a	-	-	b	b	a	a	h	a	b	b	-	-	b	a	a	-	-	-	b
OH02-16213	59.16	9.59	58.15	94.17	90.11	52.7	90.24	68.96	70.42	57.66	b	b	-	b	-	-	-	-	-	b	b	-	-	-	b	a	h	a	b	a	-	-	a	b	a	a	b	a	b	b	-	-	b	a	b	-	-	-	b
OH02-16214	57.77	10.22	55.08	86.03	77.55	52.27	84.68	64.7	71.9	55.94	a	b	-	b	-	-	-	-	-	b	a	-	-	-	b	b	a	b	b	b	-	-	b	b	b	a	a	b	b	b	-	-	b	a	-	-	-	-	a
OH02-16215	59.05	9.89	56.06	108.22	102.13	53.41	91.21	67.47	70.13	54.93	a	b	-	a	-	-	-	-	-	a	a	-	-	-	a	a	b	a	a	a	-	-	b	a	a	a	a	b	a	a	-	-	h	b	a	-	-	-	a
OH02-16216	58.54	9.2	53.29	100.75	99.32	48.86	82.1	61.87	72.84	56.52	b	b	-	a	-	-	-	-	-	a	a	-	-	-	a	a	h	a	a	a	-	-	a	h	b	a	b	a	h	b	-	-	a	a	a	-	-	-	a
OH02-16217	57.45	10.35	54.22	107.74	98.3	52.47	86.85	63.78	71.76	53.08	a	a	-	a	-	-	-	-	-	-	b	-	-	-	a	a	a	a	a	a	-	-	b	b	b	b	a	b	b	b	-	-	a	a	b	-	-	-	b
OH02-16218	58.64	10.09	52.46	101.8	94.07	49.99	81.71	60.05	73.39	49.42	a	b	-	b	-	-	-	-	-	-	-	-	-	-	a	a	b	a	a	b	-	-	a	b	a	b	a	h	b	b	-	-	a	b	a	-	-	-	b
OH02-16219	59.26	9.92	52.57	91.04	84.52	49.81	81.22	61.19	72.91	52.43	a	a	-	a	-	-	-	-	-	-	a	-	-	-	a	a	b	a	a	h	-	-	b	b	a	b	a	h	b	b	-	-	b	b	a	-	-	-	b
OH02-16221	57.95	10.21	52.56	105.15	96.66	50.28	83.7	61.69	71.82	52.83	a	a	-	b	-	-	-	-	-	b	a	-	-	-	a	b	b	a	a	h	-	-	a	b	a	a	a	h	b	b	-	-	a	b	b	-	-	-	b
OH02-16222	59.34	9.71	53.38	105.68	100.69	49.63	84.14	61.75	72.39	53.54	b	b	-	b	-	-	-	-	-	b	a	-	-	-	a	a	a	b	a	b	-	-	a	b	b	b	b	h	b	b	-	-	b	a	a	-	-	-	a
OH02-16223	58.25	10.08	53.56	100.68	93.21	51.64	84.43	63.01	72.65	50.95	b	b	-	b	-	-	-	-	-	b	a	-	-	-	a	a	a	b	a	b	-	-	b	b	a	a	b	h	b	b	-	-	b	a	a	-	-	-	b
OH02-16224	58.2	9.92	52.66	109.92	103.54	49.73	82.38	61.92	72.48	54.03	a	a	-	-	-	-	-	-	-	b	-	-	-	-	a	a	a	b	a	b	-	-	a	b	b	a	a	b	a	b	-	-	h	a	a	-	-	-	b
OH02-16225	58.57	10.71	56.19	86.36	74.32	54.02	88.42	69.09	69.95	54.6	b	b	-	b	-	-	-	-	-	b	h	-	-	-	b	b	b	b	a	a	-	-	b	a	b	a	b	a	a	a	-	-	a	b	b	-	-	-	b
OH02-16226	57.78	10	54.58	100.56	93.61	52.3	86.35	64.62	71.07	51.68	b	b	-	b	-	-	-	-	-	a	h	-	-	-	a	b	b	b	a	b	-	-	b	b	b	a	b	a	b	b	-	-	a	a	a	-	-	-	a
OH02-16227	58.34	10.45	52.94	98.35	88.25	51.29	83.88	62.51	72.65	52.01	h	a	-	b	-	-	-	-	-	a	b	-	-	-	a	h	b	a	a	-	-	-	a	b	a	a	h	b	b	b	-	-	a	a	a	-	-	-	b
OH02-16228	57.69	9.56	54.53	92.21	88.44	52.24	85.52	65.29	70.76	53.67	b	a	-	a	-	-	-	-	-	b	h	-	-	-	a	h	b	b	a	b	-	-	b	b	a	b	b	h	b	b	-	-	h	b	a	-	-	-	a
OH02-16229	58.33	10.43	54.19	88.29	78.38	51.36	82.09	61.75	71.45	49.72	a	b	-	a	-	-	-	-	-	a	-	-	-	-	a	b	b	a	a	a	-	-	h	b	a	a	a	h	b	b	-	-	h	a	a	-	-	-	a
OH02-16230	58.83	10.02	54.76	100.62	93.67	52.72	84.33	64.15	72.39	49.56	h	b	-	b	-	-	-	-	-	a	b	-	-	-	a	a	-	a	h	b	-	-	b	h	a	a	h	a	b	b	-	-	a	b	a	-	-	-	b
OH02-16231	59.15	9.63	53.3	94.37	89.79	50.91	83.65	62.63	72.43	52.35	h	b	-	b	-	-	-	-	-	b	h	-	-	-	a	a	b	a	h	b	-	-	h	h	a	a	h	h	h	b	-	-	b	b	a	-	-	-	a
OH02-16233	57.1	10.58	52.61	101.47	90.58	49.7	81.1	60.12	73.31	50.5	a	a	-	a	-	-	-	-	-	b	h	-	-	-	a	h	a	b	b	h	-	-	h	b	b	b	a	a	b	b	-	-	h	a	b	-	-	-	a
OH02-16234	59.02	10.37	53.56	104.2	94.48	51.43	83.98	61.25	71.82	47.7	b	b	-	b	-	-	-	-	-	b	a	-	-	-	a	a	b	b	a	b	-	-	b	b	b	b	b	a	b	b	-	-	a	a	a	-	-	-	a
OH02-16235	58.33	10.76	52.55	102.3	90.23	51.28	82.63	61.02	73.81	47.59	-	b	-	b	-	-	-	-	-	b	b	-	-	-	a	-	-	a	a	h	-	-	a	h	-	b	-	-	b	.	-	-	-	a	b	-	-	-	b
OH02-16236	57.89	10.01	55.82	104.04	96.95	53.73	88.82	65.82	70.24	54.63	b	a	-	a	-	-	-	-	-	b	b	-	-	-	a	a	b	a	b	b	-	-	b	a	a	b	b	a	b	a	-	-	b	a	b	-	-	-	a
OH02-16237	56.13	10.5	53.21	100.71	90.24	51.42	86.3	63.44	70.75	54.6	h	a	-	a	-	-	-	-	-	b	b	-	-	-	a	a	b	a	b	h	-	-	a	b	a	a	h	a	b	b	-	-	a	b	b	-	-	-	a
OH02-16238	57.53	10.4	54.18	98.02	88.18	51.03	88.56	62.75	70.55	53.14	-	b	-	a	-	-	-	-	-	b	b	-	-	-	a	a	b	b	a	a	-	-	a	b	b	b	-	a	b	b	-	-	b	a	a	-	-	-	b
OH02-16241	58.3	10.32	54.85	85.33	76.11	52.39	87.96	65.43	70.96	55.28	a	b	-	b	-	-	-	-	-	a	a	-	-	-	b	b	a	b	b	b	-	-	a	b	b	a	a	h	b	b	-	-	b	a	a	-	-	-	a
OH02-16242	57.28	10.71	53.48	97.81	86.03	52.52	83.89	64.5	70.99	52.01	h	a	-	b	-	-	-	-	-	a	b	-	-	-	a	a	b	a	b	h	-	-	a	b	a	a	h	b	b	a	-	-	h	a	b	-	-	-	a
OH02-16243	57.41	10.3	54.81	103.58	94.57	52.43	86.43	63.47	69.94	51.28	b	b	-	b	-	-	-	-	-	a	-	-	-	-	a	a	b	b	b	b	-	-	h	a	b	b	b	b	h	a	-	-	b	b	b	-	-	-	a
OH02-16244	56.93	9.95	54.83	95.72	89.23	51.44	90	65.55	70.7	57.08	b	b	-	a	-	-	-	-	-	b	a	-	-	-	a	b	b	b	b	b	-	-	b	a	b	a	b	b	a	b	-	-	b	b	b	-	-	-	b
OH02-16245	59.58	10.81	54.4	100.63	88.02	52.5	89.61	65.21	70.6	55.26	h	b	-	a	-	-	-	-	-	b	a	-	-	-	b	b	h	-	-	h	-	-	a	b	b	a	h	a	a	b	-	-	a	a	a	-	-	-	b
OH02-16246	58.27	10.12	53.38	99.33	91.54	52.17	82.98	62.68	70.74	48.1	b	-	-	a	-	-	-	-	-	b	-	-	-	-	b	b	b	a	a	-	-	-	-	b	a	b	b	b	a	b	-	-	-	b	-	-	-	-	b
OH02-16247	59.24	10.27	53.76	94.74	85.96	51.19	85.99	63.92	71.08	54.22	a	b	-	b	-	-	-	-	-	a	a	-	-	-	a	h	a	b	b	a	-	-	a	b	b	a	a	b	b	b	-	-	h	a	b	-	-	-	b
OH02-16248	57.4	10.97	53.51	93.15	79.34	51.4	83.57	63.93	71.78	50.95	h	b	-	b	-	-	-	-	-	b	b	-	-	-	a	h	b	h	b	a	-	-	a	b	b	b	h	h	b	b	-	-	a	a	b	-	-	-	b
OH02-16249	58.49	10.45	53.22	80.4	70.34	51.58	82.51	62.07	72.17	51.17	a	b	-	b	-	-	-	-	-	a	b	-	-	-	a	b	b	b	b	a	-	-	a	b	b	b	a	b	a	b	-	-	h	a	a	-	-	-	a
OH02-16250	58.54	9.88	54.85	94.9	88.84	53.04	88.61	66.47	70.34	53.32	b	b	-	b	-	-	-	-	-	a	a	-	-	-	a	a	b	a	-	b	-	-	b	h	a	b	b	b	b	b	-	-	h	a	a	-	-	-	b
OH02-16251	58.96	10.1	56.08	100.28	92.69	52.57	88.21	66.64	69.92	53.57	b	b	-	a	-	-	-	-	-	b	h	-	-	-	a	h	b	a	-	a	-	-	a	b	a	a	b	b	a	b	-	-	b	a	a	-	-	-	b
OH02-16252	58.21	10.07	53.51	92.88	85.39	50	81.83	61	73.7	50.59	h	b	-	b	-	-	-	-	-	b	h	-	-	-	a	a	a	a	a	a	-	-	b	b	b	a	h	a	b	b	-	-	a	b	a	-	-	-	b
OH02-16253	58.7	10.01	52.37	90.09	83.2	50.71	82.84	62.5	72.99	51.67	a	b	-	-	-	-	-	-	-	a	b	-	-	-	a	a	b	a	b	a	-	-	b	h	b	a	a	b	a	a	-	-	b	a	a	-	-	-	a
OH02-16254	56.36	9.29	56.6	101.89	99.77	52.42	88.96	67.36	69.69	57.11	b	b	-	a	-	-	-	-	-	b	b	-	-	-	a	a	a	a	b	a	-	-	b	h	b	a	b	b	b	h	-	-	b	a	a	-	-	-	b
OH02-16255	58.4	10.6	53.86	108.73	97.59	52.19	87.57	63.98	70.89	53.02	a	b	-	a	-	-	-	-	-	a	b	-	-	-	a	a	b	a	b	a	-	-	a	h	b	a	a	b	b	b	-	-	a	b	a	-	-	-	a
OH02-16256	57.78	9.84	55.08	79.82	73.94	51.33	85.99	64.55	71.31	55.12	a	b	-	a	-	-	-	-	-	a	a	-	-	-	b	b	a	a	b	a	-	-	a	b	a	b	a	h	b	b	-	-	b	a	a	-	-	-	b
OH02-16257	60.14	9.44	53.03	108.02	105.03	49.4	84.04	63.3	71.98	55.34	a	a	-	b	-	-	-	-	-	b	b	-	-	-	a	a	a	b	b	a	-	-	b	b	a	a	a	h	b	b	-	-	b	b	-	-	-	-	b
OH02-16258	58.49	10.15	59.98	106.93	98.78	54.46	97.3	71.55	67.96	60.04	b	b	-	a	-	-	-	-	-	a	b	-	-	-	b	b	h	a	b	b	-	-	a	b	b	a	b	h	b	b	-	-	b	a	b	-	-	-	b
OH02-16259	57.66	9.97	54.16	106.96	100.17	51.45	85.08	63.97	71.83	53.36	h	a	-	a	-	-	-	-	-	a	b	-	-	-	a	b	a	b	a	b	-	-	a	b	a	a	h	a	b	b	-	-	b	a	a	-	-	-	b
OH02-16261	57.72	9.72	54	81.92	77.07	50.25	83.71	63.16	71.05	53.2	a	b	-	a	-	-	-	-	-	a	h	-	-	-	b	h	b	a	a	b	-	-	b	a	h	a	a	a	a	a	-	-	b	a	b	-	-	-	a
OH02-16262	57.85	9.99	56.74	100.42	93.73	53.83	91.5	68.54	70.42	54.44	a	a	-	b	-	-	-	-	-	b	b	-	-	-	b	h	a	b	b	a	-	-	a	h	a	a	a	b	b	a	-	-	b	a	a	-	-	-	a
OH02-16263	56.52	9.97	53.48	104.93	98.15	50.66	84.53	63.54	71.26	55.79	b	a	-	a	-	-	-	-	-	a	b	-	-	-	a	a	a	a	b	b	-	-	b	b	b	b	b	a	b	b	-	-	a	a	-	-	-	-	a
OH02-16265	58.33	10.36	54	103.31	93.92	51	86.16	62.47	73.01	50.4	b	a	-	b	-	-	-	-	-	a	a	-	-	-	a	a	a	b	a	a	-	-	a	b	a	a	b	a	b	b	-	-	a	b	-	-	-	-	a
OH02-16266	59.5	9.52	54.25	112.48	108.93	50.78	88.11	63.74	71.62	54.52	a	a	-	a	-	-	-	-	-	a	b	-	-	-	a	a	b	a	a	b	-	-	a	b	b	a	a	b	b	b	-	-	b	b	-	-	-	-	b
OH02-16267	58.3	10.32	54.38	91.83	82.52	52.43	86.07	64.66	71.85	52.1	b	b	-	a	-	-	-	-	-	a	-	-	-	-	b	b	a	b	a	-	-	-	a	h	b	b	b	b	b	b	-	-	a	b	-	-	-	-	a
OH02-16268	56.83	10.75	54.46	107.01	94.94	51.93	86.79	64.09	70.82	53.41	a	b	-	a	-	-	-	-	-	a	a	-	-	-	a	h	-	a	a	a	-	-	a	b	h	a	a	b	b	b	-	-	b	a	b	-	-	-	b
OH02-16269	59.09	10.24	52.52	103.63	94.99	50.86	85.52	61.82	73.51	53.12	a	-	-	b	-	-	-	-	-	a	-	-	-	-	a	a	h	b	a	b	-	-	a	b	h	a	a	a	a	b	-	-	b	a	b	-	-	-	a
OH02-16270	58.18	10.89	53.84	95.46	82.27	50.45	83.36	60.95	72.2	48.23	-	b	-	b	-	-	-	-	-	a	a	-	-	-	a	h	h	b	a	a	-	-	a	b	-	b	-	a	b	b	-	-	a	b	b	-	-	-	b
OH02-16271	58.26	8.97	55	85.4	85.53	51.62	85.59	63.96	71.84	55.05	h	b	-	b	-	-	-	-	-	a	h	-	-	-	b	b	-	-	b	b	-	-	b	a	b	b	h	a	a	a	-	-	b	b	h	-	-	-	b
OH02-16272	58.51	9.49	53.21	97.97	94.44	50.35	82.94	61.42	71.65	52.03	h	b	-	a	-	-	-	-	-	a	a	-	-	-	a	a	h	b	h	a	-	-	a	b	a	b	h	b	b	b	-	-	b	b	b	-	-	-	b
OH02-16273	58.23	9.69	52.72	97.86	93.18	50.06	83.95	61.7	71.99	53.93	b	b	-	b	-	-	-	-	-	b	-	-	-	-	a	b	h	a	b	-	-	-	b	b	b	a	b	a	b	b	-	-	b	b	b	-	-	-	a
OH02-16274	57.85	10.49	54.91	81.45	70.93	51.78	84.62	63.52	71.86	50.38	a	h	-	b	-	-	-	-	-	a	b	-	-	-	b	b	a	b	b	a	-	-	b	b	b	b	a	a	b	b	-	-	a	a	a	-	-	-	a
OH02-16275	59.17	10.54	54.02	103.27	92.45	51.32	86.38	62.84	73.43	50.57	h	b	-	b	-	-	-	-	-	a	a	-	-	-	a	h	a	a	a	b	-	-	a	b	b	a	h	a	b	b	-	-	b	a	b	-	-	-	b
OH02-16276	58.13	10.22	53.65	117.64	109.27	51.4	87.71	63.32	70.32	53.94	b	a	-	a	-	-	-	-	-	b	b	-	-	-	a	h	b	b	a	h	-	-	a	b	b	a	b	b	b	b	-	-	b	a	-	-	-	-	b
OH02-16277	57.9	10.1	53.7	108.27	100.61	52.23	85.8	62.68	71.83	50.48	a	a	-	b	-	-	-	-	-	b	a	-	-	-	a	b	a	b	a	a	-	-	a	b	b	a	a	b	b	b	-	-	a	b	-	-	-	-	b
OH02-16278	58.38	9.87	53.2	94.32	88.21	50.1	81.62	60.55	74.27	49.62	a	b	-	a	-	-	-	-	-	b	a	-	-	-	a	b	a	b	a	a	-	-	a	b	a	b	a	a	b	b	-	-	a	a	-	-	-	-	b
OH02-16279	58.1	10.11	53.47	89.26	81.65	50.59	82.53	62.22	73.62	54.07	b	b	-	b	-	-	-	-	-	b	a	-	-	-	a	b	a	b	h	b	-	-	a	b	a	a	b	a	b	b	-	-	h	a	b	-	-	-	a
OH02-16281	58.36	10.44	53.55	100.08	89.9	50.97	86.08	62.38	72.79	52.67	a	b	-	a	-	-	-	-	-	b	b	-	-	-	a	a	b	b	h	b	-	-	b	h	b	a	a	b	a	h	-	-	h	a	a	-	-	-	a
OH02-16282	58.15	9.74	56.13	93.24	88.05	53.43	87.8	67.04	71.17	54.41	a	b	-	a	-	-	-	-	-	b	b	-	-	-	b	a	b	b	b	-	-	-	a	h	a	a	a	b	b	a	-	-	b	b	b	-	-	-	b
OH02-16283	57.81	10.42	54.83	90.36	80.53	51.54	86.19	64.28	71.69	55.73	b	b	-	a	-	-	-	-	-	a	b	-	-	-	b	b	b	b	h	h	-	-	b	h	b	b	b	a	b	b	-	-	h	a	b	-	-	-	b
OH02-16284	59.27	9.49	54.14	98.09	94.63	52.24	85.17	64.89	71.97	53.43	b	b	-	a	-	-	-	-	-	-	a	-	-	-	b	a	a	b	a	b	-	-	a	a	b	-	b	b	a	a	-	-	b	a	b	-	-	-	a
OH02-16285	57.16	9.89	53.15	96.33	90.2	49.99	83.24	62.73	71.66	57.09	b	b	-	a	-	-	-	-	-	a	a	-	-	-	b	b	a	a	b	a	-	-	b	b	a	b	b	h	b	b	-	-	b	a	a	-	-	-	a
OH02-16286	58.88	9.87	53.03	102.3	96.24	49.83	82.47	62.42	71.3	53.82	a	h	-	b	-	-	-	-	-	a	a	-	-	-	b	b	a	a	b	b	-	-	a	b	-	-	a	b	b	b	-	-	b	a	b	-	-	-	a
OH02-16287	57	9.81	52.77	101.24	95.59	50.78	83.65	62.72	71.74	53.73	b	h	-	b	-	-	-	-	-	b	h	-	-	-	a	b	a	b	b	a	-	-	a	a	a	b	b	a	a	a	-	-	-	b	b	-	-	-	b
OH02-16288	57.28	10.15	54.19	81.01	72.93	51.94	84.53	64.12	71.5	53.37	h	a	-	b	-	-	-	-	-	a	b	-	-	-	b	b	b	b	b	a	-	-	b	b	a	a	h	b	b	b	-	-	b	a	b	-	-	-	a
OH02-16289	58.33	10.11	53.08	96.88	89.24	50.28	84.58	62.79	71.66	55.83	b	b	-	b	-	-	-	-	-	b	a	-	-	-	a	h	b	a	h	a	-	-	a	b	b	a	b	a	b	b	-	-	a	a	b	-	-	-	b
OH02-16290	59	10.1	53.79	103.18	95.54	52.18	85.75	63.71	70.31	52.81	b	h	-	b	-	-	-	-	-	a	a	-	-	-	a	a	a	b	b	a	-	-	a	a	a	a	b	b	h	a	-	-	b	a	a	-	-	-	b
OH02-16291	59.53	10	52.77	96.87	89.8	51.53	82.3	61.2	74.1	47.93	a	b	-	a	-	-	-	-	-	a	a	-	-	-	a	a	a	h	a	a	-	-	b	b	b	a	a	a	h	b	-	-	b	b	b	-	-	-	b
OH02-16292	59.2	10.2	53.48	110.56	102.14	51.6	87.46	63.37	70.89	52	b	b	-	b	-	-	-	-	-	a	b	-	-	-	a	b	a	a	b	b	-	-	a	a	b	a	b	h	h	a	-	-	b	b	b	-	-	-	b
OH02-16293	57.82	10.17	53.37	94.25	86.15	51.83	84.06	64.61	70.75	53.45	a	b	-	a	-	-	-	-	-	a	-	-	-	-	a	a	a	a	h	a	-	-	b	b	b	a	a	b	b	b	-	-	a	b	b	-	-	-	b
OH02-16294	57.47	9.39	54.63	106.4	103.73	50.91	86.08	64.52	70.17	55	b	b	-	b	-	-	-	-	-	a	b	-	-	-	a	a	b	a	h	b	-	-	b	a	a	a	b	b	b	a	-	-	a	b	-	-	-	-	b
OH02-16295	58.91	9.85	55.41	96.98	91.15	52.61	87.09	66.7	70.63	53.68	b	h	-	b	-	-	-	-	-	a	b	-	-	-	a	b	a	b	b	b	-	-	b	a	b	b	b	a	a	a	-	-	b	a	b	-	-	-	b
OH02-16296	59.92	10.13	55.08	122.58	114.75	52.85	90.87	66.53	69.7	55.38	h	h	-	b	-	-	-	-	-	b	a	-	-	-	a	h	h	a	h	b	-	-	a	a	a	b	h	h	a	a	-	-	b	b	a	-	-	-	a
OH02-16297	58.75	10.3	55.53	101.47	92.26	52.85	85.78	65.48	71.85	49.39	b	h	-	a	-	-	-	-	-	a	b	-	-	-	a	h	-	a	a	a	-	-	a	b	b	b	b	b	b	b	-	-	-	b	b	-	-	-	b
OH02-16298	57.07	10.38	53.16	106.41	96.77	50.65	84.36	62.13	71.75	52.73	b	b	-	a	-	-	-	-	-	-	a	-	-	-	a	a	b	a	b	b	-	-	b	b	a	b	b	a	b	b	-	-	a	a	h	-	-	-	b
OH02-16299	58.79	9.6	54.83	105.67	101.52	52.55	89.32	66.9	70.56	54.88	a	-	-	a	-	-	-	-	-	a	h	-	-	-	a	h	b	b	h	a	-	-	a	a	b	a	a	b	a	a	-	-	a	a	a	-	-	-	a
OH02-16301	59.44	10.16	53	110.94	102.96	50.67	85.7	63.49	71.88	50.72	a	a	-	a	-	-	-	-	-	b	b	-	-	-	a	a	b	b	a	b	-	-	b	a	a	b	a	b	a	a	-	-	h	b	a	-	-	-	a
OH02-16302	56.95	9.66	54.22	97.99	93.53	50.61	84.57	64.14	71.48	57.42	a	b	-	a	-	-	-	-	-	a	h	-	-	-	a	b	a	a	h	b	-	-	a	b	b	b	a	a	b	b	-	-	a	b	b	-	-	-	a
OH02-16303	59.18	9.71	54.16	109.06	104.19	51.09	87.94	64.72	71.27	55.04	h	a	-	a	-	-	-	-	-	b	h	-	-	-	a	a	b	a	a	a	-	-	a	a	a	b	h	a	a	a	-	-	b	b	b	-	-	-	b
OH02-16304	59.01	10.07	53.22	94.03	86.77	51.55	84.27	63.04	72.09	51.46	b	b	-	a	-	-	-	-	-	b	b	-	-	-	a	h	a	a	a	b	-	-	a	b	b	a	b	b	b	b	-	-	b	b	-	-	-	-	b
OH02-16305	57.72	10.66	53.87	109.56	97.92	50.78	86.68	63.04	71.85	54.52	a	a	-	a	-	-	-	-	-	b	a	-	-	-	a	h	b	b	a	a	-	-	a	b	a	b	a	b	a	b	-	-	a	b	-	-	-	-	b
OH02-16306	58.92	10.02	54.53	98.69	91.61	49.75	85.21	63.34	71.89	55.97	b	b	-	b	-	-	-	-	-	b	h	-	-	-	a	b	b	b	b	b	-	-	a	b	a	b	b	h	a	b	-	-	-	b	b	-	-	-	b
OH02-16307	57.8	10.36	54.05	102.42	92.97	52.73	84.17	63.44	70.56	50.62	a	a	-	b	-	-	-	-	-	a	a	-	-	-	a	b	b	b	b	b	-	-	b	a	a	a	a	b	a	a	-	-	a	a	-	-	-	-	a
OH02-16308	57.28	10.32	54.58	77.49	68.29	52.63	84.19	64.3	71.6	53.4	a	a	-	b	-	-	-	-	-	b	b	-	-	-	a	b	a	b	b	a	-	-	a	h	a	a	a	b	b	b	-	-	b	b	a	-	-	-	a
OH02-16309	57.23	10.03	55.28	99.42	92.33	52.97	86.54	64.64	70.71	54.54	b	b	-	b	-	-	-	-	-	b	a	-	-	-	a	a	a	a	h	b	-	-	a	b	a	a	b	b	b	b	-	-	b	b	b	-	-	-	b
OH02-16310	57.86	9.97	56.86	94.88	88.09	53.5	89.61	69.23	69.66	54.99	a	a	-	b	-	-	-	-	-	b	a	-	-	-	b	b	a	a	a	a	-	-	b	-	a	a	a	a	a	a	-	-	a	b	a	-	-	-	a
OH02-16311	57.8	10.33	53.71	92.79	83.4	51.92	87.26	65.3	71.06	54.17	b	b	-	a	-	-	-	-	-	a	a	-	-	-	a	a	b	b	a	b	-	-	a	b	a	a	b	a	b	b	-	-	b	a	a	-	-	-	b
OH02-16312	58.27	9.33	52.4	103.13	100.83	48.63	81.57	60.93	72.9	56.17	h	b	-	b	-	-	-	-	-	a	a	-	-	-	a	a	b	b	h	a	-	-	a	b	b	b	h	h	a	b	-	-	a	b	b	-	-	-	a
OH02-16313	58.46	9.54	52.83	109.03	105.16	49.75	84.02	61.59	70.31	57.03	b	-	-	b	-	-	-	-	-	b	a	-	-	-	a	a	b	a	h	b	-	-	b	b	b	b	b	b	h	b	-	-	b	a	b	-	-	-	b
OH02-16314	59.48	9.96	56.21	86.05	79.46	52.21	86.67	66.02	70.6	54.47	b	h	-	a	-	-	-	-	-	a	b	-	-	-	a	b	a	b	h	a	-	-	b	b	a	b	b	h	a	b	-	-	b	a	a	-	-	-	b
OH02-16315	59.02	9.85	55.51	78.78	72.92	52.74	85.83	66.42	71.82	54.79	a	b	-	a	-	-	-	-	-	a	a	-	-	-	b	b	a	b	a	b	-	-	b	b	b	b	a	h	a	b	-	-	b	a	a	-	-	-	b
OH02-16316	57.22	9.78	55.67	101.39	95.92	52.55	88.18	65.57	69.31	54.44	b	h	-	b	-	-	-	-	-	a	b	-	-	-	a	a	b	a	h	a	-	-	a	b	a	b	b	h	b	b	-	-	b	a	b	-	-	-	a
OH02-16317	58.05	9.54	56.62	92.87	89.07	53.07	90.63	68.71	69.46	56.85	h	b	-	a	-	-	-	-	-	a	a	-	-	-	b	b	a	b	b	b	-	-	a	a	b	b	h	b	b	a	-	-	b	b	b	-	-	-	a
OH02-16318	59.16	10.07	54.78	102.97	95.57	53.27	87.32	66.41	71.17	53.05	h	b	-	a	-	-	-	-	-	a	h	-	-	-	a	a	b	a	a	a	-	-	-	h	a	b	h	b	a	b	-	-	a	h	a	-	-	-	a
[truncated: 20 more columns]

## Sheet: VA2 and parents
yr	POP	TYPE	rep	name	TW	TW LBS	WGT	O40	O94	MOIS	PRO	AWRC	LA	LAADJ	H20	SUCR	NACO	FLYLD	SE	FLYLD14	SE14	ADJYLD
2002	VA2	RIL	3	OH02-16308			75.59	21	25.81	13.42	10.08	53.1	65.5	57.8727	53.1	81.6	63	72.22	52.72	72.26	52.69	72.38
2004	VA2	RIL	4	OH02-16238	75.8	56.8045	80	24.5	23.64	14.0803	9.7034	53.1485	66.2744	61.3506	49.8319	84.2766	64.6433	69.375	57.4054	70.8376	56.4243	71.5897
2004	VA2	RIL	4	OH02-16252	76.92	57.6438	80	22.11	26.36	14.4319	9.5656	52.935	68.9305	64.9713	50.9841	81.1105	62.0101	72.3625	54.4654	74.5853	52.9743	74.7509
2004	VA2	RIL	4	OH02-16315	78.55	58.8654	80	23.72	24.39	14.2458	9.3075	54.1348	69.4279	67.2754	53.0425	84.8272	66.5672	70.35	56.6631	72.1704	55.442	72.7555
2002	VA2	RIL	3	OH02-16274	79.98	60	80	23.89	26.91	14.46	9.33	52.7346	71.7	69.38	51.1	84	60.6	70.14	52.04	72.41	50.52	72.16
2002	VA2	RIL	3	OH02-16271	81.07	60.8	80	22.76	26.46	14.32	8.41	53.1206	72.5	76.65	52.8	85.5	62.4	71.55	53.77	73.53	52.45	73.6
2002	VA2	RIL	3	OH02-16214	79.72	59.8	80	22.96	24.19	14.4	9.6	54.5	73	68.85	53.5	84.8	65.4	71.3	57.59	73.45	56.15	74.16
2002	VA2	RIL	3	OH02-16198			55.32	19.18	16.14	13.72	11.1	56.1	73.4	58.7	54.6	95.1	69.9	65.33	55.34	66	54.89	66.5
2004	VA2	RIL	4	OH02-16172	77.86	58.3483	80	23.55	25.36	14.2303	9.9762	53.1442	73.4202	66.5868	51.5506	84.1812	63.5406	70.5625	55.0753	72.3494	53.8766	72.6684
2004	VA2	RIL	4	OH02-16212	77.55	58.116	80	23.47	23.29	14.2323	9.5091	54.2442	74.1817	70.618	51.4717	83.1251	64.7618	70.6625	58.8006	72.4537	57.5991	73.4056
2002	VA2	RIL	3	OH02-16212			77.71	21.6	24.12	14.32	10.05	52.6	75.2	67.81	50.5	83	63.4	72.2	57.01	74.18	55.69	74.8
2004	VA2	RIL	4	OH02-16214	76.97	57.6813	80	23.53	23.29	14.2927	9.5763	53.6253	75.3132	71.2791	51.6922	82.7182	64.8985	70.5875	58.7569	72.5093	57.4677	73.4388
2003	VA2	RIL	2	OH02-16308	74.96	56.25	80	24.78	24.78	14.55	10.31	57.92	75.4	66.22	52.86	84.6	66.16	69.03	55.12	71.5	53.47	71.75
2004	VA2	RIL	4	OH02-16288	77.03	57.7263	80	24.22	24.17	14.1715	9.9009	52.9711	75.8307	69.5244	51.3541	83.723	64.9853	69.725	56.6691	71.3848	55.5557	71.9892
2002	VA2	RIL	3	OH02-16256	78.35	58.8	80	23.85	24.57	14.53	9.7	53.1	76	71.06	51.1	84.3	62.4	70.19	56.24	72.62	54.61	73.07
2002	VA2	RIL	3	OH02-16172	80.09	60.1	80	23.44	26.44	14.28	9.78	52.9	76.3	70.79	51.3	83.2	60.7	70.7	53.25	72.59	51.99	72.58
2003	VA2	RIL	1	OH02-16308	76.45	57.4	80	23.9	25.72	13.71	10.58	54.94	76.45	65.38	53.16	85.48	64.97	70.13	54.15	70.79	53.71	71.08
2002	VA2	RIL	3	OH02-16170	79.45	59.6	80	23.18	25.16	14.28	9.65	53.1	76.6	72.01	51.9	85.4	62.7	71.03	55.72	72.92	54.45	73.33
2002	VA2	RIL	3	OH02-16261	78.92	59.2	80	24.29	25.46	14.5	9.58	51.6094	76.9	72.8	50.4	83.3	60.2	69.64	54.3	72	52.72	72.12
2003	VA2	RIL	2	OH02-16249	77.9	58.44	80	23.88	27.48	14.51	10.09	56.81	77.03	69.39	51.77	81.82	63.29	70.15	51.03	72.54	49.43	72.1
2002	VA2	RIL	3	OH02-16315	80.09	60.1	80	23.34	25.77	14.04	10.02	53	77.1	69.9448	52.4	83.6	63.7	70.83	54.52	72.21	53.59	72.48
2004	VA2	RIL	4	OH02-16241	78.47	58.8054	80	24.11	23.75	14.3599	10.1876	53.8016	77.3299	69.0167	52.7468	87.1211	66.9165	69.8625	57.5058	71.9296	56.1192	72.6299
2004	VA2	RIL	4	OH02-16201	79.76	59.7721	80	24.12	25.4	14.3335	9.792	54.0345	77.5413	71.9973	52.1842	86.6242	66.7271	69.85	54.5455	71.86	53.1971	72.0635
2004	VA2	RIL	4	OH02-16170	76.86	57.5989	80	24.98	23.54	14.0818	9.9189	54.1675	77.9693	71.537	51.4569	87.9856	66.2236	68.775	57.2156	70.2408	56.2323	70.9603
2002	VA2	RIL	3	OH02-16288	79.42	59.6	80	23.47	26.37	14.09	10.27	51.658	78.3	69.43	52.1	84.8	61.7	70.66	53.35	72.15	52.35	72.21
2003	VA2	RIL	1	OH02-16249	77.98	58.5	80	23.84	27.29	14.29	10.45	53.33	78.44	68.28	52.76	83.5	62.81	70.2	51.41	72.11	50.12	71.79
2002	VA2	RIL	3	OH02-16314	81.22	60.9	80	24.14	24.94	14.23	9.66	52.6	78.8	74.2014	51.7	87	64.6	69.83	55.35	71.6	54.16	71.97
2004	VA2	RIL	4	OH02-16261	75.25	56.3923	80	25.3	23.5	14.0629	9.6716	53.0944	79.269	74.5678	50.9562	83.8225	65.2242	68.375	57.0384	69.8	56.0825	70.494
2003	VA2	RIL	2	OH02-16256	77.07	57.82	80	24.69	24.55	14.39	9.71	58.44	79.61	74.63	52.06	85.16	65.28	69.14	55.61	71.27	54.18	71.64
2004	VA2	RIL	4	OH02-16187	76.48	57.3141	80	22.5	25.16	14.0418	9.3366	51.4464	80.0855	77.7293	50.5845	80.3101	62.9369	71.875	56.2435	73.2543	55.3182	73.8184
2004	VA2	RIL	4	OH02-16256	75.96	56.9244	80	25.18	23.38	14.0122	10.0719	52.9953	80.2716	72.7683	50.282	87.9617	65.3911	68.525	57.3513	69.8403	56.469	70.6001
2004	VA2	RIL	4	OH02-16231	77.93	58.4007	80	23.68	24.12	14.428	9.332	53.3832	80.773	78.449	50.6544	82.3136	65.3084	70.4	57.1733	72.6143	55.6879	73.2413
2004	VA2	RIL	4	OH02-16225	78.7	58.9778	80	25.64	24.07	14.2551	11.1511	56.1735	80.9402	65.8825	54.1563	88.2923	69.7722	67.95	55.7211	69.7905	54.4865	70.2132
2004	VA2	RIL	4	OH02-16248	77.93	58.4007	80	23.26	26.09	14.0404	10.8883	52.6379	80.9871	67.769	51.5997	83.7555	65.1176	70.925	54.0183	72.3013	53.0951	72.4875
2004	VA2	RIL	4	OH02-16274	76.05	56.9919	80	23.15	27.92	14.5457	11.0662	54.2335	81.7776	67.3142	52.8007	83.1887	64.6592	71.0625	50.8883	73.5313	49.2322	73.0608
2002	VA2	RIL	3	OH02-16249	79.44	59.6	80	23.5	26.55	14.41	10.61	49.9	82	70.68	49.9	81	58.9	70.63	53.01	72.8	51.55	72.72
2003	VA2	RIL	1	OH02-16317			80	21.32	26.57	13.67	8	54.87	82.01	88.98	52.33	87.43	65.09	73.35	54.72	73.93	54.33	74.32
2003	VA2	RIL	2	OH02-16214	74.86	56.18	80	24.38	23.58	14.26	10.44	56.41	82.1	71.99	52.43	84.46	65.46	69.53	57.61	71.38	56.36	72.12
2003	VA2	RIL	1	OH02-16315	78.5	58.88	80	24.78	23.96	14.64	9.97	58.4	82.21	75.42	52.97	89.16	68.79	69.03	56.61	71.7	54.82	72.18
2003	VA2	RIL	1	OH02-16283	77.9	58.44	80	25.42	23.97	15.37	10.08	57.63	82.24	74.71	52.94	86	65.71	68.23	56.08	72.48	53.23	72.69
2004	VA2	RIL	4	OH02-16183	76.42	57.2691	80	25.58	21.36	14.269	9.5973	54.8531	82.5057	78.3246	50.3949	88.338	68.4047	68.025	60.7497	69.8956	59.4949	71.1697
2004	VA2	RIL	4	OH02-16253	78.47	58.8054	80	23.25	26.67	14.2497	9.8218	52.682	82.6636	76.911	51.7177	84.2486	64.4065	70.9375	53.0044	72.7663	51.7776	72.7285
2004	VA2	RIL	4	OH02-16194	77.8	58.3033	80	24.56	24.83	14.4208	10.5628	54.1705	82.7168	71.7772	52.9799	91.4928	67.6236	69.3	55.2128	71.4988	53.7379	71.7942
2002	VA2	RIL	3	OH02-16183	79.77	59.8	80	25.66	23.62	14.21	9.7	52.6	83.3	78.4	50.9	85	63.8	67.93	56.53	69.66	55.37	70.23
2002	VA2	RIL	3	OH02-16267			68.52	19.72	24.07	14	10.14	52.172	83.3	75.35	52.8	85.4	61.8	71.22	50.68	72.51	49.81	72.14
2003	VA2	RIL	1	OH02-16256	76.84	57.6	80	24.32	24.24	14.3	9.88	55.76	83.44	77.28	51.8	86.47	65.14	69.6	56.47	71.54	55.16	72.08
2004	VA2	RIL	4	OH02-16311	76.31	57.1867	80	24.02	25.02	14.264	10.5249	52.8468	83.4639	72.7896	51.6832	86.6401	65.0123	69.975	55.3055	71.8348	54.0579	72.1846
2002	VA2	PARENT	3	VA96W-247	82.25	61.7	80	25.13	26.56	14.17	9.27	55	83.6	81.7192	53.9	86.3	67.8	68.59	51.59	70.25	50.48	69.99
2003	VA2	RIL	2	OH02-16261	76.8	57.62	80	24.78	25.62	14.34	9.66	56.02	83.62	79.02	49.48	82.45	64.52	69.03	53.6	71.06	52.24	71.1
2003	VA2	RIL	2	OH02-16288	74.16	55.66	80	24.8	24.99	14.38	10.14	54.61	83.66	75.71	53.06	84.89	66.09	69	54.73	71.11	53.31	71.33
2004	VA2	RIL	4	OH02-16244	75.55	56.6172	80	24.11	22.01	14.4453	9.5955	54.3016	83.6758	79.5073	51.4413	88.8875	66.6139	69.8625	60.6191	72.1142	59.1086	73.3227
2002	VA2	RIL	3	OH02-16213	80.46	60.3	80	23.79	23.05	14.24	9.7	57.6	83.7	78.84	54.4	89.2	68.9	70.26	58.99	72.07	57.78	73.05
2002	VA2	RIL	3	OH02-16190			37.55	11.34	11.49	13.58	10.15	52.6	83.7	75.65	51.6	85.2	62.8	69.8	56.16	70.18	55.9	70.85
2004	VA2	RIL	4	OH02-16177	76.12	57.0443	80	24.47	27.03	14.3314	10.5496	54.8468	83.9667	73.1195	53.5854	85.5852	67.2276	69.4125	51.3236	71.418	49.9783	71.0743
2003	VA2	RIL	1	OH02-16279	77.08	57.83	80	25.36	22.76	14.87	9.88	57.42	84.01	77.88	53.05	86.24	66.87	68.3	58.35	71.47	56.22	72.19
2004	VA2	RIL	4	OH02-16249	76.7	57.479	80	24.23	25.3	14.123	10.6032	52.8926	84.1891	72.9667	51.7702	83.7312	63.2785	69.7125	54.6351	71.2674	53.5921	71.5381
2002	VA1	PARENT	3	VA96W-247	82.64	61.98	50	15.7	16.16	14.517		56.9508	84.2031	75.7828	54.6566	88.0895	65.5141	68.6	52.8863	71.0068	51.2718
2004	VA2	RIL	4	OH02-16279	77.93	58.4007	80	21.72	25.34	14.3957	9.4184	51.9808	84.3237	81.3949	49.8571	82.2209	61.1843	72.85	56.5202	74.9945	55.0817	75.5184
2004	VA2	RIL	4	OH02-16310	76.78	57.5389	80	25.05	25.03	14.4418	10.2769	56.4273	84.6108	75.6725	55.2977	89.2411	71.6308	68.6875	54.4495	70.9317	52.9441	71.0922
2004	VA2	RIL	4	OH02-16262	77.66	58.1984	80	23.78	25.49	14.456	9.9703	54.3193	84.67	77.8779	54.3904	89.2945	67.8132	70.275	54.6603	72.5499	53.1343	72.7427
2004	VA2	RIL	4	OH02-16229	78.63	58.9253	80	23.94	25.4	14.5184	10.4177	54.4711	84.7557	74.8318	50.1334	82.2462	62.2756	70.075	54.6914	72.4848	53.0749	72.6675
2004	VA2	RIL	4	OH02-16189	78.4	58.753	80	24.74	22.92	14.466	9.5354	53.1833	84.8055	81.0577	49.9811	85.0847	65.574	69.075	58.5233	71.3715	56.9828	72.2186
2003	VA2	RIL	2	OH02-16274	76.5	57.4	80	25.32	26.2	14.33	10.53	56.48	84.87	74.13	51.32	85.48	64.15	68.35	52.08	70.36	50.74	70.14
2004	VA2	RIL	4	OH02-16314	79.18	59.3375	80	25.23	22.42	14.7113	9.9379	56.4452	84.9839	78.4186	52.5385	87.0739	66.7569	68.4625	59.0652	71.2893	57.1689	72.1681
2004	VA2	RIL	4	OH02-16227	77.5	58.0785	80	22.9	25.78	14.2454	10.0993	51.6696	85.2031	77.508	51.1457	83.1046	62.5303	71.375	54.8511	73.1945	53.6306	73.4717
2004	VA2	RIL	4	OH02-16282	78.05	58.4907	80	23.94	25.44	14.1546	9.9108	55.3032	85.225	78.8494	53.4959	85.3074	67.114	70.075	54.62	71.6982	53.5312	71.9585
2003	VA2	RIL	1	OH02-16170	77.55	58.2	80	23.57	25.94	13.89	10.12	55.36	85.3	77.45	51.9	85.67	62.91	70.54	54.03	71.58	53.33	71.81
2003	VA2	RIL	1	OH02-16241	76.83	57.6	80	24.77	24.24	14	10.45	56.27	85.65	75.48	52.29	90.13	66.33	69.04	56.11	70.32	55.25	70.87
2002	VA2	RIL	3	OH02-16210	80.44	60.3	80	24.34	21.77	14.26	9.64	54.8	85.7	81.17	51.9	87.8	67	69.58	60.89	71.43	59.64	72.73
2003	VA2	RIL	1	OH02-16205	76.5	57.4	80	24.03	25.65	14.18	9.49	54.7	85.78	82.38	51.48	85.52	64.65	69.96	54.17	71.63	53.05	71.81
2004	VA2	RIL	4	OH02-16268	76.85	57.5914	80	23.66	25.29	14.4978	10.5077	54.0406	85.8238	75.2699	52.2993	85.6359	64.7655	70.425	55.1118	72.7902	53.5252	73.0495
2004	VA1	PARENT	1	VA96W-247	77.65	58.1909	80	25.15	23.06	14.4295	10.0292	56.9301	85.8556	78.6512	53.7029	87.0427	66.6982	68.5625	57.9581	70.7801	56.4705	71.5401
2004	VA2	RIL	4	OH02-16199	78.5	58.8279	80	23.27	24.96	14.4547	10.2345	53.9573	85.8619	77.2204	49.7745	84.2457	62.5337	70.9125	56.0021	73.1846	54.478	73.6058
2004	VA2	RIL	4	OH02-16285	77.1	57.7787	80	23.93	22.51	14.1653	9.24579	53.6032	85.9005	84.1799	50.4559	82.6676	64.9177	70.0875	59.8538	71.7339	58.7494	72.8812
2003	VA2	RIL	2	OH02-16189	78.53	58.91	80	26.47	25.24	15.23	9.51	54.45	85.93	82.34	51.13	88.96	63.26	66.9125	52.8489	70.8687	50.195	70.5618
2003	VA2	RIL	1	OH02-16193	79.7	59.78	80	23.25	25.84	14.07	10.08	56.38	86.24	78.67	51.86	80.77	64.61	70.94	54.47	72.37	53.51	72.63
2003	VA2	RIL	1	OH02-16288	74.69	56.05	80	25.29	25.09	14.73	10.31	57.48	86.24	77.1	51.18	84.74	63.66	68.39	54.14	71.26	52.22	71.29
2003	VA2	RIL	1	OH02-16225	77.56	58.18	80	25.78	23.19	14.45	10.5	58.95	86.27	75.77	53.58	88.38	68.84	67.78	57.23	70.03	55.72	70.66
2004	VA2	RIL	4	OH02-16198	77.33	57.9511	80	25.94	21.7	14.3132	10.1852	55.2092	86.3295	78.0331	53.5085	90.6562	69.8602	67.575	59.8594	69.5411	58.5405	70.653
2003	VA2	RIL	2	OH02-16170	77.32	58.01	80	24.68	24.47	14.25	10.06	54.95	86.33	78.89	51.56	89.07	66.43	69.15	55.77	70.97	54.54	71.4
2003	VA2	RIL	2	OH02-16315	77.6	58.21	80	24.86	23.8	14.44	10.05	56.47	86.41	79.09	52.46	85.66	66.59	68.93	56.84	71.17	55.33	71.74
2002	VA2	RIL	3	OH02-16187	80.32	60.2	80	22.41	27.6	14.23	9.29	49.6	86.5	84.45	49	79	57.7	71.99	52.08	73.77	50.88	73.58
2004	VA2	RIL	4	OH02-16283	77.16	57.8237	80	23.85	23.3	14.2271	10.2773	53.5126	86.6546	77.7135	50.4375	85.2474	65.1313	70.1875	58.504	71.9675	57.31	72.8702
2004	VA2	RIL	4	OH02-16168	76.5	57.3291	80	24.48	23.32	14.1428	9.18675	54.6342	86.6709	85.3636	52.1014	86.0834	67.6499	69.4	57.9971	70.9977	56.9254	71.835
2003	VA2	RIL	1	OH02-16271	76.86	57.66	80	24.18	24.13	14.21	9.19	56.7	86.97	85.61	52.25	84.34	65.5	69.78	56.77	71.52	55.6	72.13
2004	VA2	PARENT	4	VA96W-247	78.2	58.6031	80	25.17	23.17	14.4117	9.9887	56.3508	87.0117	80.0908	54.3134	89.0091	68.5235	68.5375	57.7421	70.7166	56.2804	71.4443
2003	VA2	RIL	2	OH02-16271	76.67	57.52	80	27.05	23.03	15.38	8.84	55.6	87.1	88.22	51.34	88.89	63	66.1875	56.5061	70.463	53.6381	70.7414
2004	VA2	RIL	4	OH02-16236	78.69	58.9703	80	25.17	24.67	14.0422	10.2375	54.2545	87.3179	78.6554	52.451	87.6487	65.5602	68.5375	55.0064	69.9177	54.0805	70.2714
2003	VA2	RIL	1	OH02-16274	75.99	57.02	80	24.99	26.06	14.46	11.06	56.24	87.35	72.92	51.9	85.78	64.64	68.76	52.63	71.05	51.09	70.89
2004	VA2	RIL	4	OH02-16247	79.04	59.2326	80	23.8	24.4	14.4535	10.2778	52.7459	87.4628	78.5182	51.3629	86.7606	65.8631	70.25	56.5836	72.5195	55.0613	73.0399
2002	VA1	PARENT	3	VA96W-247	81.39	61.0425	50	15.4	15.49	14.2368		55.9995	87.4692	78.7223	52.4406	89.1136	65.223	69.2	55.2312	71.0009	54.0232
2004	VA2	RIL	4	OH02-16316	77.48	58.0635	80	25.27	22.91	14.5157	9.4456	54.2228	87.4815	84.3623	51.8521	86.3402	65.8235	68.4125	58.14	70.8164	56.5274	71.5861
2002	VA2	RIL	3	OH02-16282			32.25	9.42	11.3	13.44	10.24	54.8121	87.6	78.92	54.6	87.3	64.6	70.79	50.5	70.86	50.45	70.6
2004	VA2	RIL	4	OH02-16289	78.11	58.5356	80	23.39	23.24	14.3091	9.5204	52.1308	87.7052	84.0624	49.5314	85.417	63.7491	70.7625	58.9472	72.7198	57.6342	73.6776
2003	VA2	RIL	2	OH02-16229	75.79	56.87	80	27.46	26.1	15.24	10.32	55.75	87.71	78.49	51.48	83.76	60.38	65.675	50.3236	69.653	47.6551	68.9143
2002	VA2	RIL	3	OH02-16228			58.56	16.88	20.28	13.84	9.8	53	87.8	82.19	53.8	83.4	64	71.17	51.34	72.12	50.71	71.9
2004	VA2	RIL	4	OH02-16245	79.57	59.6298	80	24.54	24.12	14.3565	10.4189	53.5082	87.818	77.8857	51.9113	88.1307	66.8498	69.325	56.5092	71.3847	55.1275	71.9164
2003	VA2	RIL	2	OH02-16172	75.29	56.5	80	24.69	24.5	14.23	10.68	54.1	87.82	76.07	51.5	85.17	64.09	69.14	55.7	70.93	54.5	71.35
2004	VA2	RIL	4	OH02-16228	76.7	57.479	80	25.6	23.06	14.3898	9.4544	52.8029	87.8209	84.6401	51.05	84.7785	65.9683	68	57.6103	70.1317	56.1803	70.8424
2003	VA2	RIL	1	OH02-16261	76.87	57.7	80	24.47	26.04	14.28	9.85	55.25	87.85	81.92	50.07	85.21	62.74	69.41	53.11	71.31	51.84	71.28
2002	VA2	RIL	3	OH02-16311	80.2	60.1	80	23.32	26.88	14.19	9.74	51.2	87.9	82.7672	51	82	61.3	70.85	52.58	72.55	51.44	72.45
2002	VA2	RIL	3	OH02-16248			73.18	20.71	26.5	13.96	11.31	51.2	87.9	71.69	50	81.2	59.7	71.7	49.49	72.91	48.68	72.35
2003	VA2	RIL	2	OH02-16241	77.59	58.21	80	25.93	23.66	14.45	10.03	56.5	87.96	80.74	52.02	87.78	65.3	67.59	56.24	69.84	54.73	70.31
2004	VA2	RIL	4	OH02-16265	79	59.2026	80	22.14	26.69	14.2953	9.922	51.8123	88.1448	81.6908	50.6841	86.2294	62.7805	72.325	53.8714	74.2524	52.5785	74.3508
2004	VA2	RIL	4	OH02-16302	76.08	57.0144	80	23.89	22.55	14.1245	9.4503	54.1892	88.1743	85.0222	51.2394	83.9648	64.4409	70.1375	59.8111	71.6956	58.7659	72.8458
2003	VA2	RIL	1	OH02-16187	75.72	56.82	80	22.59	26.92	14.92	11.32	56.97	88.23	72.01	53.27	84.26	62.75	71.76	53.11	75.04	50.91	74.86
2002	VA2	RIL	3	OH02-16193	80.87	60.6	80	23.46	26.39	14	10.73	51.9	88.3	76.22	51.4	82.1	59.5	70.68	53.33	71.97	52.45	72.05
2004	VA2	RIL	4	OH02-16223	77.15	57.8162	80	23.42	26.14	14.447	10.2123	52.6184	88.3219	79.8358	51.7453	86.7306	65.7423	70.725	53.7999	72.9804	52.287	73.0292
2003	VA2	RIL	1	OH02-16289	76.27	57.23	80	25.95	24.1	14.85	10.35	56.26	88.33	78.89	52.8	84.69	64.37	67.56	55.41	70.69	53.32	70.91
2002	VA2	RIL	3	OH02-16199	81.33	61	80	23.44	26.68	14.11	10.11	51.2	88.5	80.76	51.2	80.3	58.8	70.7	52.83	72.23	51.8	72.2
2002	VA2	PARENT	3	VA96W-247	80.35	60.3	80	25.57	24.51	14.26	9.6	55.3	88.5	84.3192	54.2	87.3	67.3	68.04	54.97	69.89	53.72	70.19
2003	VA2	RIL	1	OH02-16253	78.54	58.91	80	23.68	25.79	14.79	9.35	54.53	88.58	86.11	49.63	83.1	62.64	70.4	54.21	73.41	52.19	73.44
2002	VA2	RIL	3	OH02-16250	80.44	60.3	80	23.97	26.55	14.34	9.72	51.5	88.7	83.71	51.8	85.4	62	70.04	52.61	72.07	51.25	71.94
2004	VA2	RIL	4	OH02-16219	77.44	58.0335	80	22.27	25.52	14.2781	9.458	52.4645	88.7667	85.5607	50.1384	81.9623	62.4688	72.1625	55.7942	74.0527	54.5262	74.4822
2004	VA2	RIL	4	OH02-16295	78.11	58.5356	80	24.82	24.8	14.4018	9.8843	55.0505	88.7999	82.6098	53.8273	86.3398	67.9904	68.975	55.0562	71.1327	53.6088	71.4062
2003	VA2	RIL	2	OH02-16225	76.36	57.29	80	25.82	23.86	14.31	10.4	55.21	88.84	79.03	54.34	86.56	70.69	67.73	55.96	69.68	54.65	70.13
2003	VA2	RIL	1	OH02-16219	79.27	59.46	80	22.99	27.36	14.43	10.44	53.91	89.02	78.91	50.28	82.13	62.52	71.26	52.01	73.49	50.52	73.24
2003	VA2	RIL	2	OH02-16193	79.22	59.42	80	26.67	24.28	15.33	9.79	55.59	89.04	83.49	49.81	87.57	61.93	66.6625	54.4722	70.8339	51.674	70.7784
2004	VA2	RIL	4	OH02-16281	78.27	58.6555	80	22.94	25.54	14.3406	9.949	52.9758	89.1288	82.4858	51.4638	85.4017	65.0258	71.325	55.2401	73.3504	53.8815	73.6702
2004	VA1	PARENT	1	PIO 26R61	80.03	59.9745	80	24.49	23.99	13.8679	10.2571	54.9637	89.1404	80.3407	52.4545	84.7078	63.734	69.3875	56.7826	70.3909	56.1095	71.0895
2002	VA2	RIL	3	OH02-16179	79.15	59.4	80	25.59	26.32	14.26	10.97	54.5	89.2	75.39	54.6	87.7	65.7	68.01	51.63	69.86	50.38	69.59
2004	VA2	RIL	4	OH02-16304	76.78	57.5389	80	25.92	20.88	13.9854	9.275	53.579	89.3023	87.3773	51.4685	89.4712	67.1491	67.6	61.3905	68.8574	60.5471	70.3104
2002	VA2	RIL	3	OH02-16225	79.79	59.8	80	25.6	24.45	14.48	10.83	54.4	89.4	76.6	54	90.4	67.1	68	55.06	70.33	53.49	70.59
2002	VA2	PARENT	3	PIO 26R46	79.6	59.7	80	21.42	27.55	14.18	8.84	48.7	89.6	90.7333	48.3	78.9	58.4	73.23	52.97	74.89	51.85	74.87
2004	VA2	RIL	4	OH02-16273	77.41	58.0111	80	24.3	24.55	14.5753	9.7412	52.7623	89.6165	84.4281	50.3495	85.4073	63.9015	69.625	55.9246	72.1578	54.2256	72.5362
2002	VA2	RIL	3	OH02-16229	80.25	60.2	80	22.84	27.95	14.4	10.36	51	89.7	80.18	51.6	81.3	60	71.45	51.1	73.61	49.65	73.21
2003	VA2	RIL	2	OH02-16177	75.17	56.41	80	24.2	26.72	13.67	9.84	55.49	89.84	83.96	54.09	84.94	67.43	69.75	52.11	70.33	51.72	70.29
2002	VA2	RIL	3	OH02-16278	80.88	60.7	80	20.82	30.01	14.4	9.66	52.3803	89.9	85.3	49.6	80.5	57.2	73.98	49.29	76.13	47.85	75.42
2002	VA2	RIL	3	OH02-16298			29.15	8.19	10.61	13.71	9.55	50.5562	90	86.16	51.6	81.1	60	71.9	49.38	72.57	48.93	72.05
2002	VA2	RIL	3	OH02-16272	80.48	60.4	80	22.45	27.9	14.28	9.42	51.0985	90.1	87.19	50.6	81.2	58.1	71.94	51.52	73.83	50.25	73.53
2003	VA2	RIL	2	OH02-16314	78.8	59.11	80	27.86	23.36	15.29	10	57.79	90.18	83.17	52.18	85.4	64.74	65.175	55.1975	69.2634	52.455	69.3408
2002	VA2	RIL	3	OH02-16254			67.33	19.76	20.64	13.9	9.23	52.6	90.2	88.59	51.6	84.9	63.3	70.65	56.61	71.72	55.9	72.38
2003	VA2	RIL	1	OH02-16314	78.06	58.56	80	26.02	23.86	14.65	10.18	57.97	90.24	81.96	52.35	87.19	67.98	67.48	55.8	70.17	53.99	70.51
2002	VA2	RIL	3	OH02-16241	78.07	58.6	80	24.18	24.38	14.32	10.59	52.8	90.3	79.15	52.5	86.8	63.2	69.78	56.32	71.75	55	72.26
2004	VA2	RIL	4	OH02-16211	77.74	58.2584	80	23.43	26.8	14.0416	10.3435	53.5429	90.3914	80.9869	52.3485	84.9203	62.6802	70.7125	52.6251	72.0914	51.7001	72.0404
2003	VA2	RIL	2	OH02-16293	75.94	56.98	80	25.09	25.26	14.36	10.19	55	90.5	82.16	52.21	84.86	66.29	68.64	54	70.71	52.61	70.81
2003	VA2	RIL	2	OH02-16248	75.7	56.8	80	24.6	27.13	14.36	11.16	54.38	90.68	75.58	51.95	83.64	63.59	69.25	51.03	71.31	49.65	70.91
2004	VA2	RIL	4	OH02-16317	78.78	59.0377	80	26.26	21.3	14.2173	10.0724	54.7681	90.7943	83.2875	52.9719	91.0121	71.0363	67.175	60.3647	68.9338	59.1849	70.1552
2004	VA2	RIL	4	OH02-16242	77.72	58.2434	80	23.64	25.82	14.1993	10.5177	51.4362	90.8191	80.1952	51.47	84.4645	64.6084	70.45	54.1874	72.1699	53.0337	72.3456
2003	VA2	RIL	1	OH02-16229	76.39	57.31	80	25.99	26.98	14.57	10.58	55.5	91	79.96	52.2	81.03	64.25	67.51	50.05	70.03	48.36	69.41
2004	VA2	RIL	4	OH02-16202	78.54	58.8579	80	25.07	25.92	14.0374	10.2773	53.7337	91.0104	82.0693	51.1887	87.0146	63.8264	68.6625	52.8127	70.0323	51.8938	70.0143
2004	VA2	RIL	4	OH02-16178	78	58.4532	80	24.29	25.03	14.0158	10.2307	51.8138	91.1841	82.5692	49.9974	83.6839	62.7448	69.6375	55.0709	70.9606	54.1833	71.3318
2002	VA2	RIL	3	OH02-16161	81.01	60.7	80	24.05	27.49	14.06	10.77	51.3	91.2	78.79	52.6	84.1	63	69.94	50.87	71.35	49.92	70.99
2002	VA2	RIL	3	OH02-16310	79.31	59.5	80	25.19	24.23	14.32	9.72	53.1	91.3	86.2844	52.1	84.5	63.5	68.51	55.79	70.49	54.46	70.91
2002	VA2	RIL	3	OH02-16302	79.77	59.8	80	23.2	25	14.22	9.16	52.4298	91.4	90.3	50	81.9	61.4	71	55.99	72.77	54.8	73.25
2002	VA2	RIL	3	OH02-16317	79.05	59.3	80	26.41	22.72	14.11	10.19	56	91.4	83.1403	53.2	89.7	66.6	66.99	57.6	68.51	56.58	69.29
2004	VA2	RIL	4	OH02-16237	77.23	57.8762	80	24.89	23.29	14.0619	10.0953	53.3511	91.5258	83.8587	51.4577	85.7086	64.4631	68.8875	57.7391	70.3103	56.7846	71.1237
2002	VA2	RIL	3	OH02-16168	79.1	59.3	80	24.09	24.28	14.15	9.27	53.1	91.6	89.67	51.8	86	64.3	69.89	56.57	71.5	55.49	72.1
2004	VA2	RIL	4	OH02-16309	75.53	56.6022	80	24.4	24.65	14.0608	9.6946	52.247	91.6458	86.7836	50.9686	84.3054	63.6209	69.5	55.6655	70.9204	54.7126	71.3816
2004	VA2	RIL	4	OH02-16318	79.33	59.4499	80	24.3	25.23	14.1703	9.8575	54.1167	91.6835	85.681	53.7712	86.56	66.9236	69.625	54.7038	71.2822	53.5921	71.5528
2004	VA2	RIL	4	OH02-16190	76.82	57.5689	80	25.08	21.53	13.9846	9.8492	54.6507	91.8385	85.8941	51.402	85.5777	66.5165	68.65	60.7975	69.9057	59.9552	71.2581
2003	VA2	RIL	1	OH02-16179	77.04	57.8	80	24.65	25.08	13.76	11.48	58.66	91.97	74.6	55.32	90.09	69	69.19	54.69	69.96	54.17	70.33
2002	VA2	RIL	3	OH02-16219	80.58	60.4	80	21.77	27.16	14.25	9.99	50.1	92	85.04	48.7	79.3	58.5	72.79	53.36	74.62	52.13	74.65
2002	VA2	RIL	3	OH02-16207			76.71	24.67	23.21	14.03	10.43	52.6	92.1	82.13	52.5	86.6	62.4	67.84	55.4	69.19	54.5	69.61
2003	VA2	RIL	1	OH02-16293	76.49	57.4	80	24.19	25.33	14.22	10.37	52.98	92.18	82.58	51.5	85.06	64.33	69.76	54.61	71.52	53.44	71.76
2003	VA2	RIL	2	OH02-16212	75.44	56.61	80	25.11	23.23	14.33	10.52	56.34	92.19	81.55	52.53	85.52	65.91	68.61	57.68	70.62	56.34	71.35
2002	VA2	RIL	3	OH02-16279			76.42	19.92	26.82	14.06	10.21	51.2257	92.3	83.82	48.9	80.7	57.5	73.93	52.53	75.35	51.58	75.28
2004	VA2	RIL	4	OH02-16270	77.17	57.8312	80	23.34	26.96	14.4476	11.253	55.6413	92.3361	76.5651	51.7844	86.4406	61.9114	70.825	52.4179	73.0817	50.9041	72.8954
2003	VA2	RIL	2	OH02-16267	77.19	57.91	80	25.51	25.43	14.49	10.2	56.33	92.34	83.93	51.52	84.41	65.53	68.11	53.33	70.46	51.76	70.42
2004	VA2	RIL	4	OH02-16308	77.6	58.1534	80	23.76	25.48	14.0902	10.2689	52.4066	92.55	83.6677	51.3217	85.0687	63.0083	70.3	54.6942	71.784	53.6987	72.0728
2004	VA2	RIL	4	OH02-16186	77.19	57.8462	80	25.01	23.3	14.0186	9.9913	53.3138	92.6525	85.7134	50.2496	82.0876	63.0646	68.7375	57.6287	70.0667	56.737	70.872
2002	VA2	RIL	3	OH02-16206	79.93	59.9	80	25.29	24.69	14.34	9.25	52.2	92.7	90.99	51.2	85.4	61.4	68.39	54.87	70.41	53.51	70.67
2004	VA2	RIL	4	OH02-16284	79.93	59.8995	80	24.06	26.17	14.1721	9.6503	53.9644	92.7555	88.2034	53.0693	84.2862	65.9473	69.925	53.2177	71.5861	52.1035	71.6037
2004	VA2	RIL	4	OH02-16254	75.9	56.8795	80	26.7	21.12	14.5341	9.04312	56.585	92.773	92.4712	52.4849	88.3497	69.1477	66.625	60.3752	69.0687	58.736	70.2138
2003	VA2	RIL	2	OH02-16199	78.68	59.02	80	25.83	24.55	15.13	9.51	53.48	92.83	89.25	49.45	83.43	60.12	67.7125	54.6797	71.4416	52.1782	71.4719
2004	VA2	RIL	4	OH02-16185	76.74	57.509	80	25.19	23.99	14.018	9.6258	53.5727	92.8473	88.4667	52.2916	88.7433	65.4169	68.5125	56.2306	69.8404	55.3399	70.4082
2004	VA2	RIL	4	OH02-16207	77.2	57.8537	80	24.7	22.97	14.06	9.9258	53.0992	93.0444	86.5638	50.135	85.5077	64.5984	69.125	58.4629	70.5437	57.5113	71.4806
2004	VA2	RIL	4	OH02-16297	78.21	58.6106	80	23.44	26.8	14.419	10.489	54.0229	93.2593	82.8363	52.8847	86.824	66.3012	70.7	52.6167	72.8949	51.1444	72.7494
2004	VA2	RIL	4	OH02-16259	76.5	57.3291	80	22.88	26.25	14.2935	10.1779	51.9422	93.3185	85.0732	50.6095	84.2171	61.8593	71.4	54.0441	73.3235	52.7538	73.4517
2003	VA2	RIL	1	OH02-16197	77.82	58.4	80	22.45	28.5	14.27	9.97	53.01	93.33	86.55	49.8	81.06	60	71.94	50.48	73.82	49.22	73.34
2003	VA2	RIL	2	OH02-16304	78.2	58.66	80	23.64	28.24	14.61	10.25	56.03	93.38	84.66	52.53	83.84	63.41	70.45	49.89	73.05	48.15	72.4
2004	VA2	RIL	4	OH02-16193	77.26	57.8986	80	25.58	21.57	14.4777	9.09795	56.3304	93.4216	92.7359	52.2039	88.3063	68.3148	68.025	60.3638	70.3468	58.8064	71.5039
2002	VA2	RIL	3	OH02-16283			71.71	21.05	22.08	13.85	10.77	52.7066	93.5	81.08	51.2	84.1	60.8	70.65	56.42	71.61	55.77	72.25
2003	VA2	RIL	2	OH02-16311	76.74	57.57	80	24.85	24.8	14.23	10.78	54.68	93.51	81.06	52.72	88.28	66.22	68.94	55.03	70.73	53.83	71.04
2003	VA2	RIL	2	OH02-16202	79.63	59.72	80	25.7	27.19	14.32	9.55	57.35	93.59	89.76	52.03	82.21	65.66	67.88	49.93	69.86	48.59	69.28
2004	VA2	RIL	4	OH02-16192	78.06	58.4982	80	24.4	24.37	14.4822	9.339	52.6297	93.6098	91.2368	50.2934	83.4152	64.0318	69.5	56.1691	71.8315	54.6051	72.2744
2003	VA2	RIL	1	OH02-16267	77.83	58.39	80	23.97	26.08	14.03	10.71	56.63	93.62	81.67	53.27	86.28	66.91	70.04	53.45	71.4	52.54	71.49
2004	VA2	RIL	4	OH02-16213	78.09	58.5206	80	25.72	23.02	14.5333	9.7629	54.4809	93.6677	88.3274	51.3909	85.6618	66.4527	67.85	57.5903	70.292	55.9522	70.9639
2003	VA2	RIL	1	OH02-16250	78.35	58.77	80	26.24	24.21	14.74	9.48	58.57	93.7	90.37	54.01	90.92	67.47	67.2	54.97	70.08	53.03	70.26
2004	VA2	RIL	4	OH02-16306	78.45	58.7904	80	23.58	22.41	14.5674	10.1875	53.9077	93.7641	85.4516	49.3002	83.9265	64.3428	70.525	60.28	73.0407	58.5925	74.1614
2003	VA2	RIL	2	OH02-16190	76.86	57.66	80	24.95	23.18	14.38	10.23	58.15	93.81	85.21	52.67	83.82	64.61	68.81	57.89	70.93	56.47	71.69
2004	VA2	RIL	4	OH02-16203	78.3	58.678	80	24.9	24.25	14.4558	9.4334	53.2529	93.8246	90.7908	50.8598	85.2347	64.8658	68.875	55.9891	71.1494	54.4634	71.5682
2004	VA2	RIL	4	OH02-16216	77.87	58.3558	80	24.98	23.19	14.4157	9.4141	55.2685	93.8847	90.986	51.823	86.8015	66.6644	68.775	57.8517	70.9627	56.3841	71.708
2002	VA2	RIL	3	OH02-16189	82.15	61.6	80	24.02	27	14.23	10.18	52.1	93.9	85.65	52.2	84.4	62.3	69.98	51.77	71.75	50.57	71.51
2002	VA2	RIL	3	OH02-16253			59.6	16.74	20.94	13.78	10.9	50.5	94	80.69	51.1	81.1	60.4	71.91	51.14	72.73	50.6	72.49
2002	VA2	RIL	3	OH02-16262			48.45	14.64	15.02	14.31	9.6	52.842	94.1	89.89	52.8	87.7	63.1	69.78	55.58	71.73	54.27	72.12
2002	VA2	PARENT	3	PIO 26R46	80.19	60.1	80	20.94	28.22	14.15	9.29	48.7	94.1	92.0974	48.6	79.8	57.6	73.83	52.22	75.44	51.14	75.29
2002	VA2	RIL	3	OH02-16202	82.35	61.7	80	25.39	28.92	14.36	9.99	53.5	94.2	87.33	52.9	85	61.9	68.26	47.04	70.32	45.66	69.24
2004	VA2	RIL	4	OH02-16278	76.9	57.6289	80	22.12	28.65	14.0551	10.3942	53.3973	94.2857	84.5263	50.8926	82.2647	61.6805	72.35	50.501	73.7581	49.5565	73.3427
2003	VA2	RIL	2	OH02-16219	78.72	59.05	80	23.86	26.88	13.09	9.82	53.77	94.35	88.62	50.1	81.51	61.29	70.18	52.12	69.49	52.58	69.59
2004	VA2	RIL	4	OH02-16161	77.4	58.0036	80	24.91	24.6	14.0269	10.0964	53.5693	94.3606	86.6858	51.861	87.8065	64.9981	68.8625	55.3458	70.2096	54.4421	70.6248
2004	VA2	PARENT		PIO 26R61	80	59.952	80	24.79	24.99	13.8393	10.1936	52.2191	94.3915	86.0363	52.3184	83.0181	63.8402	69.0125	54.7365	69.954	54.1049	70.3119
2004	VA2	RIL	4	OH02-16226	77.45	58.041	80	24.03	26.17	14.0242	9.9918	53.0529	94.4825	87.5399	52.0706	86.2368	64.2687	69.9625	53.2428	71.3038	52.3431	71.3621
2004	VA2	RIL	4	OH02-16232	77.23	57.8762	80	24.69	23.67	14.2491	10.4868	52.9523	94.6572	84.2496	50.7293	85.5112	65.6103	69.1375	57.2048	70.965	55.9789	71.6415
2004	VA2	RIL	4	OH02-16233	77.39	57.9961	80	22.52	25.84	14.4599	10.2114	52.6489	94.8925	86.4127	48.4982	81.6777	59.9693	71.85	55.0452	74.1333	53.5136	74.3906
2004	VA2	RIL	4	OH02-16271	76.09	57.0218	80	24.29	22.29	14.4251	9.4874	54.5839	95.01	91.5982	50.0769	83.6425	64.9361	69.6375	59.9892	71.8456	58.508	72.9519
2003	VA2	RIL	1	OH02-16189	78.8	59.11	80	24.03	25.87	14.43	9.68	56.41	95.12	90.38	50.79	84.54	65.83	69.96	53.78	72.19	52.28	72.24
2003	VA2	RIL	2	OH02-16253	77.78	58.35	80	23.18	26.44	14.35	9.86	51.8	95.13	89.13	50.37	82.88	62.59	71.03	53.47	73.07	52.1	73.08
2003	VA2	RIL	1	OH02-16282	77	57.77	80	25.57	23.37	14.64	9.52	58.42	95.15	91.51	54.83	91.41	68.45	68.04	57.06	70.71	55.27	71.27
2004	VA2	RIL	4	OH02-16217	77.21	57.8612	80	23.4	25.11	14.4558	10.0956	52.4654	95.1555	87.4863	51.4717	85.0138	63.4176	70.75	55.636	73.0244	54.1103	73.3832
2003	VA2	RIL	2	OH02-16247	78.21	58.67	80	25.72	24.26	14.36	9.82	55.25	95.22	89.51	51.94	88.12	65.7	67.85	55.31	69.91	53.93	70.23
2002	VA2	RIL	3	OH02-16295	81.96	61.5	80	23.68	25.89	14.11	9.47	52.6824	95.3	91.99	52.3	84.5	63.7	70.4	54.03	71.93	53.01	72.1
2002	VA2	RIL	3	OH02-16316			34.85	10.28	12.28	13.36	10.36	51.5	95.3	85.7746	52.4	82.5	64.3	70.5	50.02	70.4	50.09	70.07
2004	VA2	RIL	4	OH02-16269	78.65	58.9403	80	22.32	26.2	14.1665	10.0635	51.7741	95.3979	87.9534	49.939	82.8565	62.5574	72.1	54.577	73.749	53.4708	73.999
2002	VA2	RIL	3	OH02-16273	80.04	60	80	22.68	26.05	14.21	9.71	50.493	95.4	90.45	50.7	81.4	59.4	71.65	54.55	73.4	53.38	73.63
2002	VA2	RIL	3	OH02-16194	80.42	60.3	80	24.04	27.84	14.12	10.29	51.7	95.4	86.4	53	85.3	61.5	69.95	50.25	71.49	49.21	71.02
2003	VA2	RIL	1	OH02-16270	76.46	57.37	80	24.39	28.41	14.51	11.2	54.07	95.4	79.97	50.49	83.47	63.95	69.51	48.91	71.91	47.31	71.11
2003	VA2	RIL	2	OH02-16187	75.14	56.38	80	23.96	24.75	14.34	9.66	53.43	95.41	90.76	51.36	86.58	63.69	70.05	55.84	72.08	54.47	72.5
2004	VA2	RIL	4	OH02-16218	78	58.4532	80	22.44	26.27	14.5081	9.9749	52.7319	95.4132	88.5889	49.436	82.2326	60.4928	71.95	54.3607	74.3375	52.7591	74.4666
2004	VA2	RIL	4	OH02-16197	76.94	57.6588	80	23.49	26.67	14.0659	10.7303	52.4926	95.4591	83.347	51.1155	85.6015	63.2464	70.6375	52.8048	72.0689	51.8446	72.0425
2002	VA2	RIL	3	OH02-16306	81	60.7	80	23.42	24.33	14.09	10.56	51.8643	95.5	84.53	50	83.9	61.6	70.73	57	72.21	56.01	72.89
2002	VA2	RIL	3	OH02-16230	81.26	60.9	80	22.6	29.35	14.45	9.4	52.5	95.6	92.83	52.8	81.6	62	71.75	48.87	74	47.36	73.21
2002	VA2	RIL	3	OH02-16258	79.74	59.8	80	25.28	22.04	14.39	9.88	56.7	95.6	89.45	52.9	94.5	67.8	68.4	59.72	70.54	58.29	71.61
2003	VA2	RIL	1	OH02-16304	78.95	59.2	80	23.3	28.75	14.25	10.59	52.57	95.62	84.48	51.7	81.89	61.26	70.88	49.29	72.71	48.07	72.04
2004	VA2	RIL	4	OH02-16163	76.55	57.3666	80	25.04	23.65	13.944	10.0812	52.518	95.6329	88.0645	49.6918	85.1756	63.4048	68.7	56.9687	69.8679	56.1853	70.5794
2003	VA2	RIL	2	OH02-16291	78.36	58.78	80	22.66	28.72	14.37	9.74	56.25	95.65	90.48	51.59	81.86	62.66	71.68	49.91	73.76	48.52	73.16
2004	VA2	RIL	4	OH02-16294	76.44	57.2841	80	25.52	22.64	14.5511	9.23631	54.1255	95.6851	94.0309	50.3247	85.8068	64.9586	68.1	58.4435	70.5805	56.7795	71.393
2004	VA2	RIL	4	OH02-16215	77.8	58.3033	80	26.26	22.42	14.5406	9.3393	55.7289	95.7906	93.4155	52.9323	92.2217	69.5672	67.175	58.2806	69.6328	56.6319	70.4202
2002	VA2	RIL	3	OH02-16233			69.32	18.04	25.79	13.91	10.96	50.1	95.8	82.08	50.8	79.1	58.5	73.98	49.71	75.06	48.98	74.55
2004	VA2	RIL	4	OH02-16287	77.51	58.086	80	24.56	23.63	14.1294	9.3312	53.4725	95.8596	93.5412	51.3938	83.9905	64.6965	69.3	57.3773	70.8687	56.325	71.604
2003	VA2	RIL	1	OH02-16168	76.34	57.28	80	24.16	24.72	14.98	9.66	54.62	95.9	91.29	50.6	82.84	60.61	69.8	55.73	73.21	53.45	73.45
2003	VA2	RIL	1	OH02-16278	76.79	57.6	80	22.14	28.23	14.06	9.92	52.14	95.9	89.43	50.14	81.94	60.59	72.33	51.21	73.74	50.26	73.45
2002	VA2	RIL	3	OH02-16284			72.92	20.61	24.57	13.84	10.01	51.9295	95.9	88.88	52.2	85	61.7	71.74	53.03	72.69	52.39	72.75
2004	VA2	RIL	4	OH02-16165	78.73	59.0003	80	24.27	25.35	14.5388	10.349	54.1348	95.9491	86.5061	50.8645	85.9667	62.9327	69.6625	54.5128	72.1164	52.8667	72.2637
2003	VA2	RIL	2	OH02-16183	75.4	56.58	80	25.54	22.54	14.13	10.03	55.91	95.99	88.81	51.51	88.08	66.88	68.08	58.61	69.64	57.56	70.59
2002	VA2	RIL	3	OH02-16285			74.62	22.08	23.08	13.8	10.66	50.4193	96	84.4	49.7	80.7	60.5	70.41	56.07	71.26	55.5	71.86
2003	VA2	RIL	2	OH02-16161	77.9	58.44	80	25.02	26.18	14.37	9.52	54.9	96.16	92.52	51.32	85.61	65.59	68.73	52.38	70.82	50.98	70.65
2004	VA2	RIL	4	OH02-16171	78.14	58.5581	80	25.03	24.62	14.0505	9.9839	53.775	96.2268	89.3395	51.7598	85.2551	64.0678	68.7125	55.2119	70.1107	54.274	70.4972
2003	VA2	RIL	2	OH02-16211	79.11	59.34	80	25.55	25.2	14.65	10.23	58.61	96.25	87.67	53.65	87.83	65.06	68.06	53.72	70.77	51.9	70.75
2004	VA2	RIL	4	OH02-16246	78.6	58.9028	80	24.95	24.14	14.342	9.6813	52.3081	96.3193	91.5502	50.5938	84.9205	64.1034	68.8125	56.149	70.8409	54.7883	71.3149
2003	VA2	PARENT		VA96W-247			68.09	22.99	19.17	14.43	10.67	59.19	96.37	84.71	54.88	96.19	73.04	66.24	57.49	68.45	56.01	69.13
2003	VA2	RIL	2	OH02-16270	76.67	57.52	80	26.7	26.79	15.23	10.72	55	96.41	84.34	49.19	81.7	59.53	66.625	49.7373	70.5712	47.0902	69.7366
2003	VA2	RIL	2	OH02-16279			73.03	21.16	23.64	14.14	10.85	53.29	96.43	83.52	50.48	81.01	63.25	71.03	54.42	72.63	53.35	72.86
2003	VA1	PARENT	2	PIO 26R46	77.04	57.8	80	21.84	27.32	14.34	9.45	52.15	96.46	93.29	49.41	80.25	59.72	72.7	53.03	74.73	51.66	74.67
2002	VA2	RIL	3	OH02-16252	80.31	60.2	80	21.18	29.33	14.29	9.84	49.8	96.5	90.62	48.9	78.2	57.4	73.53	50.14	75.44	48.85	74.91
2003	VA2	RIL	1	OH02-16291	78.2	58.7	80	22.38	28.89	14.01	10.17	52.07	96.5	88.28	52.18	82.88	62.18	72.03	49.86	73.34	48.98	72.83
2003	VA2	RIL	1	OH02-16211	79.09	59.3	80	25.4	24.94	14.19	10.8	55.4	96.52	83.93	54.8	89.16	65.23	68.25	54.32	69.95	53.18	70.15
2003	VA2	RIL	1	OH02-16190	76.29	57.2	80	25.22	23.13	14.25	10.42	54.59	96.53	86.57	53.27	84.87	64.99	68.48	57.78	70.31	56.55	71.08
2004	VA2	RIL	4	OH02-16166	77.06	57.7488	80	23.26	22.9	14.6867	9.8401	54.3186	96.5518	90.6711	49.669	83.9135	63.7878	70.925	59.6405	73.6987	57.7799	74.6812
2004	VA2	RIL	4	OH02-16307	75.25	56.3923	80	25.12	26.43	13.9292	11.027	54.113	96.5738	82.3848	52.9183	85.2831	64.0751	68.6	51.8404	69.7359	51.0784	69.5792
2003	VA2	RIL	2	OH02-16228	76.6	57.47	80	25.44	24.14	14.31	9.56	54.77	96.6	92.68	51.6	85.52	65.71	68.2	55.76	70.16	54.44	70.58
2003	VA2	RIL	1	OH02-16228	77.48	58.12	80	25.81	24.22	14.74	9.35	57.45	96.63	94.17	52.5	88.35	65.51	67.74	55.31	70.62	53.37	70.85
2003	VA2	RIL	2	OH02-16231	78.27	58.71	80	26.73	25	15.4	9.43	53.1	96.65	93.66	49.68	87.42	60.89	66.5875	53.0693	70.9006	50.176	70.5905
2003	VA2	RIL	1	OH02-16202	79.45	59.6	80	24.5	27.75	13.92	10.05	54.79	96.66	89.33	53.24	84.08	62.88	69.38	50	70.5	49.24	70.03
2004	VA2	RIL	4	OH02-16263	76.66	57.449	80	24.4	23.37	14.2325	9.6207	52.0301	96.6906	92.3457	50.5777	81.383	64.134	69.5	57.9676	71.2916	56.7658	72.1018
2003	VA2	RIL	1	OH02-16194	79.06	59.3	80	23.75	27.54	14.19	10.76	55.77	96.75	84.46	51.75	88.31	65.76	70.31	51.04	72.01	49.9	71.65
2004	VA2	RIL	4	OH02-16235	77.31	57.9361	80	22.55	28.09	14.6152	10.9261	53.6961	96.7928	83.3101	50.4089	81.303	61.3596	71.8125	51.1053	74.4316	49.3484	73.9808
2002	VA2	RIL	3	OH02-16286	80.36	60.3	80	23.96	24.81	14.37	9.42	51.3911	96.8	93.92	50	80.5	61	70.05	55.73	72.15	54.32	72.54
2004	VA2	RIL	4	OH02-16291			46.16	13.25	17.22	13.5958	10.8548	53.5372	96.8102	83.8266	52.6001	83.8108	62.6144	71.2955	47.6755	71.7106	47.3971	70.9281
2004	VA2	PARENT	4	PIO 26R46	76.3	57.1792	80	24.14	22.79	14.0214	9.08917	51.5739	96.818	96.1938	48.7699	83.15	61.8044	69.825	59.2016	71.1602	58.3059	72.2322
2004	VA2	RIL	4	OH02-16298	77.56	58.1235	80	22.56	25.97	14.4404	10.2455	51.2685	96.9407	88.2222	51.0458	84.1777	62.3823	71.8	54.7876	74.0411	53.2842	74.2595
2003	VA2	RIL	1	OH02-16247	79.69	59.8	80	24.67	25.12	14.35	10.15	55.35	96.95	88.9	50.86	84.99	62.84	69.16	54.6	71.21	53.23	71.42
2002	VA2	RIL	3	OH02-16244	78.01	58.5	80	25.12	23.62	14.29	10.49	52.5	97	86.59	51.9	87.5	63	68.6	56.96	70.52	55.67	71.15
2004	VA2	RIL	4	OH02-16234	78.3	58.678	80	23.68	26.23	14.5901	10.4706	53.5278	97.0958	86.8016	51.2036	84.3255	61.513	70.4	53.4268	72.9648	51.7064	72.9149
2002	VA2	RIL	3	OH02-16197	81.2	60.9	80	23	29.12	14.33	9.89	50.5	97.1	90.91	50.4	82.6	57.9	71.25	48.91	73.24	47.58	72.49
2003	VA2	RIL	2	OH02-16278	76.8	57.62	80	22.79	27.46	14.32	9.51	54.93	97.17	93.58	49.79	81.77	62.68	71.51	52	73.5	50.67	73.27
2004	VA2	RIL	4	OH02-16181	76.26	57.1492	80	23.97	24.78	13.9552	9.6896	53.3977	97.2217	92.3945	51.4897	84.963	62.8202	70.0375	55.7737	71.2296	54.974	71.7352
2004	VA2	RIL	4	OH02-16290	78.34	58.708	80	25.25	24.84	14.0093	10.0822	53.1554	97.2321	89.6567	51.1967	85.8063	64.2306	68.4375	54.6301	69.7466	53.752	70.0444
2004	VA2	RIL	4	OH02-16264	76.33	57.2017	80	24.14	24.99	14.1388	9.7322	52.7299	97.3525	92.2271	52.0691	84.7144	65.1265	69.825	55.2632	71.4141	54.1972	71.7876
2004	VA2	RIL	4	OH02-16205	76.4	57.2542	80	25.25	24.03	13.9649	9.5557	53.1192	97.4212	93.5313	51.9231	86.8737	64.985	68.4375	56.1096	69.6506	55.2958	70.2109
2004	VA2	RIL	4	OH02-16162	78.24	58.6331	80	25.49	23.58	14.0224	9.9357	53.1574	97.652	91.1021	50.9378	89.0232	65.7529	68.1375	56.7419	69.4749	55.8447	70.1285
2003	VA2	RIL	2	OH02-16201	78.34	58.76	80	25.34	24.18	14.27	10.17	56.85	97.66	89.49	54.41	90.21	68.13	68.33	55.76	70.19	54.51	70.62
2004	VA2	RIL	4	OH02-16305	77.61	58.1609	80	22.73	25.41	14.3537	10.4747	52.2156	97.6795	87.3566	51.3534	86.9419	62.9117	71.5875	55.6312	73.6412	54.2536	74.0243
2004	VA2	RIL	4	OH02-16230	77.58	58.1385	80	23.42	27.15	14.2892	10.4566	52.9233	97.6899	87.4937	52.7854	85.6086	64.6867	70.725	52.0148	72.6392	50.7308	72.4235
2003	VA2	RIL	1	OH02-16272	77.86	58.41	80	23.57	26.32	14.08	9.64	55.28	97.69	93.18	50.89	80.21	63.5	70.54	53.36	71.99	52.38	72.06
2002	VA2	RIL	3	OH02-16270	79.97	60	80	22.98	29.13	14.28	10.36	50.6275	97.7	88.18	50.3	81.8	58.4	71.28	48.91	73.18	47.64	72.44
2003	VA2	RIL	2	OH02-16197	78.3	58.73	80	23.64	27.86	14.47	10	53.73	97.72	90.69	51.1	81.93	63.39	70.45	50.57	72.76	49.02	72.25
2002	VA2	RIL	3	OH02-16304	80.86	60.6	80	22.51	28.6	14.25	10.05	50.6941	97.8	90.49	50.5	81.9	60.3	71.86	50.25	73.69	49.02	73.19
2003	VA2	RIL	2	OH02-16207	77.25	57.95	80	25.19	23.44	14.46	9.49	55.34	97.85	94.43	50.23	82.87	64.05	68.51	57.23	70.8	55.7	71.43
2003	VA2	RIL	1	OH02-16199	77.7	58.29	80	24.24	25.24	15.29	10.12	56.71	97.94	90.14	53.84	85.78	65.84	69.7	54.73	73.78	52	73.78
2002	VA2	RIL	3	OH02-16166			74.28	20.22	23.57	13.93	10.56	50.2	98.1	87.21	48.8	81.9	61.1	72.78	56.4	73.93	55.63	74.54
2004	VA2	RIL	4	OH02-16267	78.21	58.6106	80	23.2	25.19	14.3322	10.2902	52.413	98.1231	89.0917	52.0978	88.1717	64.4415	71	55.6514	73.0072	54.305	73.399
2004	VA2	RIL	4	OH02-16188	79.38	59.4874	80	23.38	27.7	14.0823	10.4027	53.1072	98.1377	88.3188	51.6136	83.5224	62.4496	70.775	51.0774	72.2419	50.0933	71.9178
2002	VA2	RIL	3	OH02-16203	80.99	60.7	80	24.03	24.33	14.11	9.73	50.8	98.2	93.14	49.3	83.8	60	69.96	56.53	71.49	55.5	72.09
2003	VA2	RIL	2	OH02-16163	75.14	56.38	80	25.71	24.51	14.36	10.15	57.75	98.25	90.18	52.66	87.15	64.81	67.86	54.85	69.92	53.47	70.17
2004	VA2	RIL	4	OH02-16258	78.4	58.753	80	24.57	19.11	14.4059	9.412	58.305	98.3033	95.4193	54.0484	94.0101	70.9097	69.2875	65.5241	71.454	64.0707	73.5061
2004	VA2	RIL	4	OH02-16250	76.81	57.5614	80	25.94	23.09	14.3695	9.8302	54.1041	98.3754	92.564	51.7576	88.5151	68.3651	67.575	57.2882	69.6629	55.8877	70.3238
2003	VA2	RIL	1	OH02-16251	76.84	57.65	80	26.28	23.9	14.46	10.13	58.89	98.38	90.45	53.22	89.44	69.42	67.15	55.51	69.43	53.98	69.77
2002	VA2	RIL	3	OH02-16297	80.52	60.4	80	23.26	29.05	14.09	10.03	52.7159	98.4	91.2	52.7	83.9	63.1	70.93	48.8	72.41	47.81	71.69
2002	VA2	RIL	3	OH02-16291	81.52	61.1	80	21.22	30.87	14.21	10.11	49.9347	98.4	90.62	50.8	82.1	58.7	73.48	47.48	75.22	46.31	74.26
2003	VA2	RIL	2	OH02-16171	75.85	56.91	80	23.52	30.6	14.59	10.24	55.39	98.48	89.77	52.86	82.89	64.61	70.6	45.82	73.17	44.1	71.82
2003	VA2	RIL	1	OH02-16284	79.34	59.51	80	24.51	24.07	14.71	8.83	56.06	98.59	99.8	51.46	85.64	65.2	69.36	56.62	72.19	54.72	72.66
2003	VA2	RIL	1	OH02-16171	79.27	59.5	80	22.59	30.21	13.75	11.19	51.84	98.73	83.37	51.67	79.86	59.72	71.76	47.38	72.5	46.88	71.63
2003	VA2	RIL	2	OH02-16213	77.8	58.36	80	28.21	20.38	15.26	9.38	60.66	98.75	96.12	50.95	94.95	69.9	64.7375	60.6488	68.7544	57.9542	69.7666
2003	VA2	RIL	2	OH02-16250	76.64	57.5	80	25.83	24.79	14.21	10.45	55.23	98.78	88.67	54.63	89.59	68.02	67.71	54.24	69.46	53.07	69.64
2002	VA2	RIL	3	OH02-16186	78.81	59.1	80	24.33	25.18	14.04	9.92	51.8	98.8	92.35	50.4	82.2	60.1	69.59	54.77	70.96	53.85	71.28
2003	VA2	RIL	1	OH02-16246	77.87	58.41	80	25.05	28.94	14.64	10.06	56.68	98.82	91.39	52.6	80.68	64.27	68.69	47.33	71.36	45.54	70.26
2003	VA1	PARENT		VA96W-247	75.8	56.9	80	26.23	22.71	14.16	10.36	57.5	98.82	89.31	55.09	92.46	71.64	67.21	57.76	68.84	56.67	69.63
2004	VA2	RIL	4	OH02-16173	78.16	58.5731	80	25.84	23.18	14.302	9.20101	54.2975	98.8209	97.4138	52.931	86.8177	68.3131	67.7	57.2009	69.6419	55.8982	70.3046
2002	VA2	RIL	3	OH02-16171	82.21	61.6	80	21.79	32.09	14.32	10.26	51.6	98.9	90.09	50.9	80.4	59.5	72.76	44.87	74.75	43.54	73.31
2002	VA2	RIL	3	OH02-16237			66.52	18.99	22.61	13.8	10.78	50.7	98.9	86.48	51.1	81	59.6	71.45	52.43	72.3	51.86	72.28
2004	VA2	RIL	4	OH02-16210	76.48	57.3141	80	27.45	18.12	14.5276	8.92201	61.0908	98.9485	99.4944	55.1931	89.9603	74.7985	65.6875	65.5186	68.1172	63.8887	70.1383
2004	VA2	RIL	4	OH02-16251	79.2	59.3525	80	25.16	23.78	14.6093	9.7805	56.0244	98.9995	93.536	52.2731	87.9326	66.6416	68.55	56.6375	71.1563	54.8892	71.6475
2002	VA2	RIL	3	OH02-16245	80.5	60.4	80	24.85	24.76	14.33	11.09	51.9	99.1	84.5	51.8	86.7	61.4	68.94	55.1	70.94	53.76	71.24
2003	VA2	RIL	2	OH02-16283	76.22	57.19	80	24.99	23.18	14.3	10.5	55.51	99.11	88.58	51.61	89.38	65.5	68.76	57.86	70.7	56.56	71.48
2003	VA2	RIL	2	OH02-16198	73.64	55.27	80	28.24	21.81	14.31	11.17	59.2	99.11	83.91	55.12	102.13	72.72	64.7	57.86	66.67	56.54	67.44
2003	VA2	RIL	1	OH02-16231	79.25	59.44	80	22.52	26.78	13.7	9.52	54.99	99.14	95.47	51.16	81.28	63.5	71.85	53.41	72.48	52.99	72.65
2003	VA2	RIL	1	OH02-16207	77.21	57.9	80	24.99	23.2	14.3	9.7	54.29	99.17	94.25	50.55	85.84	64.42	68.76	57.83	70.71	56.52	71.47
2003	VA2	RIL	2	OH02-16178	75.85	56.91	80	24.08	26.76	14.42	10.51	56.14	99.28	88.71	52.69	85.67	63.49	69.9	52.15	72.09	50.68	71.86
2002	VA2	RIL	3	OH02-16247			66.96	20.22	20.91	13.8	10.77	51.6	99.3	86.91	50.6	84.1	61.3	69.8	55.26	70.66	54.69	71.11
2003	VA2	RIL	2	OH02-16282			72.28	22.75	21.71	14.61	9.78	54.69	99.31	93.83	52.01	86.7	65.54	68.53	56.17	71.14	54.41	71.55
2004	VA2	RIL	4	OH02-16275	77.64	58.1834	80	22.46	26.66	14.3735	10.768	53.2756	99.4628	87.0868	52.169	86.3224	64.556	71.925	53.667	74.0215	52.2607	74.0658
2002	VA2	RIL	3	OH02-16178	81.1	60.8	80	24.59	26.97	14.27	10.66	51.9	99.5	87.8	51.3	85	61.2	69.26	51.33	71.14	50.07	70.81
2004	VA2	RIL	4	OH02-16255	79	59.2026	80	23.14	26.15	14.175	10.4098	52.3477	99.5041	89.6355	51.7382	83.8794	62.9015	71.075	54.0098	72.7423	52.8914	72.8939
2002	VA2	RIL	3	OH02-16201	81.52	61.1	80	26.01	24.48	14.22	10.65	54.3	99.6	88.06	53.2	90.7	63.2	67.49	54.66	69.26	53.47	69.51
2004	VA2	RIL	4	OH02-16204	75.36	56.4748	80	25.62	22.67	13.986	9.2135	54.1825	99.6566	98.1621	51.8227	89.1256	67.1287	67.975	58.3119	69.2337	57.4675	70.1632
2004	VA2	RIL	4	OH02-16196	77.85	58.3408	80	22.3	27.6	14.2235	9.9748	52.215	99.7175	92.8939	51.5518	85.2168	63.3523	72.125	52.1664	73.8972	50.9776	73.7234
2004	VA2	RIL	4	OH02-16303	77.55	58.116	80	24.51	23.4	14.2935	9.9299	53.1384	99.7494	93.2401	51.6407	86.1472	65.1742	69.3625	57.8302	71.286	56.5399	72.0578
2003	VA2	RIL	1	OH02-16165	78.3	58.73	80	25.01	25.93	14.45	10.19	55.39	99.83	91.52	51.64	84.69	64.59	68.74	52.85	71	51.33	70.88
2003	VA2	RIL	2	OH02-16194	77.91	58.44	80	25.19	26.52	14.19	10.3	56.6	99.88	90.76	52.97	85.43	64.76	68.51	51.61	70.2	50.48	69.94
2003	VA2	RIL	1	OH02-16281	74.85	56.17	80	24.63	24.75	14.91	10.7	55.11	99.9	87.99	49.22	86.7	61.99	69.21	55.3	72.47	53.12	72.66
2003	VA2	RIL	2	OH02-16246	76.69	57.54	80	27.69	26.99	15.24	9.94	52.56	99.94	93.35	51.81	85.76	61.11	65.3875	48.4037	69.3483	45.7468	68.2853
2003	VA2	PARENT	2	PIO 26R46	77.09	57.83	80	22.77	26.3	14.38	9.31	52.12	99.94	97.76	48.27	83.18	59.92	71.54	54.05	73.66	52.62	73.76
2004	VA2	RIL	4	OH02-16191	79.46	59.5473	80	23.51	25.51	14.4993	10.1523	53.291	99.9643	91.8982	50.0449	82.1841	61.7547	70.6125	54.8416	72.981	53.2528	73.194
2003	VA2	RIL	2	OH02-16252	76.72	57.56	80	24.43	26.43	14.45	10.37	56.25	99.99	90.41	50.1	84.55	62.63	69.46	52.44	71.72	50.92	71.54
2003	VA2	RIL	2	OH02-16310	76.39	57.31	80	27.46	22.04	14.54	9.8	60.16	100	94.41	53.26	91.63	70.77	65.68	58.05	68.14	56.4	68.89
2004	VA2	RIL	4	OH02-16293	78.8	59.0527	80	25.15	24.49	14.0987	9.917	52.0955	100.059	93.6399	51.7946	82.1857	63.2171	68.5625	55.351	70.0649	54.3432	70.4632
2004	VA2	RIL	4	OH02-16206	77.22	57.8687	80	25.34	23.34	13.9586	10.0453	52.5332	100.074	92.7571	50.3305	87.0807	64.2282	68.325	57.2997	69.5245	56.4951	70.2886
2003	VA2	RIL	1	OH02-16295	77.17	57.89	80	25.98	23.97	14.72	10.31	56.6	100.082	90.9	52.1	90.3	68.3	67.53	55.63	70.38	53.71	70.67
2003	VA2	RIL	1	OH02-16232	78.28	58.72	80	26.64	23.28	14.83	10.88	56.69	100.11	86.95	52.99	89.42	66.09	66.7	56.37	69.78	54.31	70.17
2003	VA2	RIL	2	OH02-16251	77.75	58.33	80	28.19	23.31	15.11	9.97	56.43	100.2	93.4	52.79	87.82	66.48	64.7625	55.0087	68.4514	52.5341	68.5422
2004	VA2	RIL	4	OH02-16164	79.59	59.6447	80	23.7	25.35	14.5699	10.1551	53.6827	100.25	92.1645	50.2959	84.5563	62.6851	70.375	54.9734	72.8961	53.2822	73.1141
2004	VA2	RIL	4	OH02-16277	78.6	58.9028	80	23.23	27.13	14.4966	10.0889	53.3069	100.269	92.6469	51.9134	83.788	62.3273	70.9625	52.2107	73.3251	50.6258	73.0915
2002	VA2	RIL	3	OH02-16318	81.24	60.9	80	23.26	27.09	14.06	9.74	52.5	100.3	95.1711	53.4	84.7	63.5	70.93	52.26	72.35	51.3	72.23
2002	VA2	RIL	3	OH02-16165	81.31	61	80	23.98	26.86	14.11	10.34	51.1	100.3	90.96	51.3	81.7	60.9	70.03	52.05	71.55	51.03	71.39
2003	VA2	RIL	2	OH02-16245	78.23	58.68	80	25.05	23.84	14.13	11.36	55.18	100.37	83.87	53.44	91.36	65.96	68.69	56.62	70.26	55.56	70.87
2002	VA2	RIL	3	OH02-16290	81.62	61.2	80	24.52	26.73	14.25	9.91	50.5806	100.4	93.98	51.2	82.5	61.3	69.35	51.82	71.18	50.6	70.94
2003	VA2	RIL	1	OH02-16213	79.13	59.35	80	25.84	21.28	14.68	9.48	59.76	100.51	97.18	53.98	91.1	70.63	67.7	60.71	70.45	58.86	71.62
2003	VA2	RIL	2	OH02-16244	74.54	55.94	80	26.06	22.56	14.39	9.75	56.09	100.53	95.28	50.58	96.24	67.07	67.43	58.18	69.57	56.74	70.37
2003	VA2	RIL	2	OH02-16242	75.43	56.6	80	25.25	26.3	14.29	10.68	52.47	100.57	88.78	53.13	83.31	63.96	68.44	51.96	70.35	50.68	70.12
2002	VA2	RIL	3	OH02-16211			67.72	20.24	21.68	14.21	10.85	52.6	100.6	87.72	52.5	86.7	63.5	70.11	54.34	71.84	53.18	72.04
2003	VA2	RIL	1	OH02-16255	74.88	56.19	80	28.85	22.41	14.9	11.08	59.07	100.73	86.19	54.51	97.45	70.36	63.94	56.19	67.18	54.01	67.52
2004	VA2	RIL	4	OH02-16243	76.36	57.2242	80	24.9	26.1	13.9403	10.6897	53.4408	100.733	88.9048	51.9925	85.0764	64.1038	68.875	52.6316	70.0349	51.8535	70.01
2002	VA2	RIL	3	OH02-16231	80.1	60.1	80	22.54	27.72	14.27	10.33	51.7	100.9	91.53	52.1	83.6	60.8	71.83	51.76	73.69	50.51	73.43
2002	VA2	RIL	3	OH02-16312	78.68	59	80	22.16	24.8	14.25	9.35	50	101	98.5824	49.1	79.9	58.8	72.3	57.12	74.13	55.9	74.79
2004	VA2	RIL	4	OH02-16286	76.91	57.6364	80	24.82	24.31	14.0078	10.5621	52.5005	101.189	90.2544	50.4526	84.9586	64.1818	68.975	55.9442	70.2808	55.0682	70.8024
2002	VA2	RIL	3	OH02-16307	79.96	60	80	24.4	28.44	14.25	9.89	51.3257	101.2	94.94	52.9	82.7	61.5	69.5	48.85	71.33	47.62	70.59
2002	VA2	RIL	3	OH02-16163	79.2	59.4	80	25.39	24.8	14.22	10.36	51	101.2	91.71	50.5	82.2	61.1	68.26	54.59	70.02	53.41	70.26
2004	VA2	RIL	4	OH02-16313	76.9	57.6289	80	24.99	22.38	14.0934	9.4674	51.9303	101.212	97.9403	49.6101	85.5586	62.8794	68.7625	59.3165	70.2534	58.3164	71.3272
2002	VA2	RIL	3	OH02-16204	79.77	59.8	80	24.74	25.22	14.34	9.06	52.7	101.3	100.84	53.3	87.7	62.7	69.08	54.36	71.11	53	71.28
2002	VA2	RIL	3	OH02-16264	78.58	58.9	80	22.78	26.46	14.18	9.3	51.7028	101.4	99.25	51.2	84.4	61.7	71.53	53.76	73.21	52.63	73.31
2004	VA2	RIL	4	OH02-16299	78.04	58.4832	80	25.18	23.91	14.0148	9.8863	54.1132	101.493	95.2889	52.7218	90.1642	67.1144	68.525	56.3845	69.846	55.4984	70.4407
2002	VA2	RIL	3	OH02-16275	81.19	60.9	80	21.62	29.21	14.35	10.03	51.3949	101.5	94.31	51.5	84.2	60	72.98	49.97	75.03	48.59	74.45
2004	VA2	RIL	4	OH02-16179	77.64	58.1834	80	24.14	23.95	14.3597	10.3542	51.7888	101.514	92.0342	50.3931	86.2917	64.0046	69.825	57.125	71.8917	55.7386	72.5272
2003	VA2	RIL	2	OH02-16168	73.7	55.31	80	25.1	22.8	14.32	9.85	56.14	101.53	95.59	52.85	89.2	67.92	68.63	58.47	70.61	57.14	71.49
2004	VA1	PARENT	1	PIO 26R46	75.68	56.7146	80	23.3	24.19	14.126	10.3097	53.1007	101.557	92.3896	49.0162	81.838	60.4119	70.875	57.3369	72.4364	56.2895	73.1656
2003	VA2	RIL	2	OH02-16216	77.47	58.12	80	25.37	22.77	15.21	8.79	52.69	101.6	103.08	46.74	82.99	58.86	68.2875	58.3196	72.1857	55.7047	72.8155
2002	VA2	RIL	3	OH02-16223	80.47	60.3	80	22.34	28.49	14.43	9.92	50.9	101.6	95.18	51.3	80.4	60	72.08	50.59	74.3	49.1	73.81
2003	VA2	RIL	1	OH02-16235	76.79	57.61	80	23.25	29.32	14.29	10.88	53.13	101.65	88.47	53.46	81.33	64.05	70.94	48.33	72.86	47.05	72.01
2003	VA2	RIL	2	OH02-16285	75.22	56.44	80	24.46	22.97	14.48	9.71	53.41	101.66	96.67	49.4	83.21	62.6	69.43	58.64	71.74	57.09	72.61
2003	VA2	RIL	1	OH02-16285	76.35	57.28	80	24.78	22.67	14.75	9.88	55.22	101.67	95.49	50.36	86.41	62.89	69.03	58.95	71.94	56.99	72.79
2003	VA2	RIL	1	OH02-16244	75.54	56.7	80	24.84	23.2	14.17	9.88	56.4	101.68	95.52	51.8	87.39	65.54	68.95	57.94	70.6	56.83	71.43
2004	VA2	RIL	4	OH02-16174	77.23	57.8762	80	25.6	23.2	14.4176	9.8139	53.8835	101.73	96.0331	51.6634	87.8051	65.2909	68	57.3529	70.1918	55.8826	70.8519
2003	VA2	RIL	2	OH02-16165	79.87	59.9	80	27.19	25.42	15.17	9.66	55.05	101.76	97.11	50.99	84.32	61.51	66.0125	51.8652	69.8396	49.2979	69.3802
2004	VA2	RIL	4	OH02-16175	78.9	59.1277	80	23.56	25.39	14.5111	10.3161	52.4863	101.863	92.6499	51.2794	85.397	64.3365	70.55	55.0142	72.944	53.4083	73.1834
2004	VA2	RIL	4	OH02-16272	78.4	58.753	80	24.75	24.4	14.5308	9.674	52.3399	101.879	97.1613	50.1	82.964	63.284	69.0625	55.8371	71.4991	54.2026	71.8735
2004	VA2	RIL	4	OH02-16221	78	58.4532	80	25.04	23.35	14.4513	9.6538	52.4365	101.893	97.3168	49.8954	85.8898	63.8519	68.7	57.5146	70.9647	55.9954	71.6439
2002	VA2	RIL	3	OH02-16182	82.63	62	80	24.19	27.2	14.15	10.28	51.6	101.9	92.9	50.7	79.7	60.1	69.76	51.26	71.37	50.18	71.06
2003	VA2	RIL	1	OH02-16166	74.05	55.57	80	23.96	24.26	14.55	10.65	55.53	101.9	90.35	50.3	83.15	64.7	70.05	56.71	72.54	55.04	73.05
2003	VA2	RIL	1	OH02-16287	75.92	57	80	23.85	25.99	14.07	10.12	52.44	101.95	94.07	51.51	83.39	61.75	70.19	53.71	71.63	52.75	71.75
2004	VA2	RIL	4	OH02-16222	76.8	57.5539	80	25.7	21.62	14.465	9.7481	55.4188	102.01	96.7729	51.9205	89.1736	67.3979	67.875	60.1842	70.1693	58.6451	71.299
2003	VA2	RIL	1	OH02-16242	75.91	56.96	80	25.55	25.12	14.47	10.85	56.46	102.04	89.09	52.97	83.87	64.86	68.06	53.87	70.37	52.32	70.43
2002	VA2	RIL	3	OH02-16218	80.64	60.5	80	21.88	29.51	14.35	10.24	50.7	102.1	93.45	50.9	80.8	59.6	72.65	49.23	74.69	47.85	73.99
2004	VA2	RIL	4	OH02-16208	76.3	57.1792	80	24.85	23.44	14.2649	10.3611	53.3391	102.127	92.5994	50.9025	86.638	65.3743	68.9375	57.4977	70.7992	56.2489	71.5215
2003	VA2	RIL	2	OH02-16272	75.33	56.53	80	27.79	24.04	15.29	9.28	54.06	102.17	100.23	49.78	87.44	60.83	65.2625	53.9552	69.3395	51.2203	69.2069
2003	VA2	RIL	1	OH02-16273	76.88	57.68	80	23.41	24.77	13.98	9.78	54.65	102.21	96.75	50.36	81.58	62.97	70.74	56.23	71.98	55.4	72.56
2004	VA2	RIL	4	OH02-16182	78.42	58.7679	80	24.11	23.68	14.4235	9.7145	51.9839	102.241	97.2394	48.6317	85.3987	62.5466	69.8625	57.6311	72.0671	56.1522	72.773
2003	VA2	RIL	2	OH02-16306	77.04	57.8	80	27.46	22.6	15.37	9.59	55.79	102.28	98.13	49.91	88.71	63.05	65.675	56.9852	69.9185	54.1386	70.2821
2002	VA2	RIL	3	OH02-16246			55.79	16.59	20.72	13.94	10.79	51.9	102.3	89.76	53.7	80.5	61.2	70.26	47.14	71.42	46.37	70.46
2004	VA2	RIL	4	OH02-16167	78.61	58.9103	80	24.64	25.77	14.0725	10.8614	52.6035	102.382	89.3518	50.9809	86.6308	63.5051	69.2	53.4501	70.6457	52.4803	70.7274
2003	VA2	RIL	2	OH02-16227	77.68	58.27	80	23.79	26.58	14.42	10.49	53.57	102.44	92.02	51.09	83.9	62.42	70.26	52.71	72.45	51.25	72.32
2002	VA2	RIL	3	OH02-16191	81.13	60.8	80	22.64	28.53	14.11	9.96	50.6	102.5	95.81	50.3	81.2	58.4	71.7	50.26	73.22	49.24	72.75
2002	VA2	RIL	3	OH02-16232			37.93	11.14	12.18	13.89	11.03	50.3	102.5	88.23	49.2	82.1	60.7	70.63	54.54	71.67	53.84	71.99
2003	VA2	RIL	2	OH02-16287	74.45	55.87	80	24.34	25.05	14.44	9.67	55.86	102.51	97.82	50.39	85.08	64.53	69.58	54.99	71.82	53.49	72.07
2003	VA1	PARENT	1	PIO 26R61	77.23	57.9	80	26.08	21.91	14.33	9.49	56.67	102.57	99.14	53.52	93.78	68.25	67.4	59.37	69.41	58.02	70.43
2003	VA2	RIL	1	OH02-16227	76.59	57.46	80	26.05	24.46	14.87	10.82	55.62	102.58	89.84	52.06	86.88	65.04	67.44	54.66	70.6	52.54	70.69
2002	VA2	RIL	3	OH02-16221			68.57	19.6	23.85	14.08	10.95	50.7	102.6	88.98	52.2	83.5	61.1	71.42	51.3	72.88	50.32	72.59
2003	VA2	RIL	1	OH02-16230	77.37	58.04	80	23.9	27.49	14.24	10.35	56.9	102.76	93.3	53.3	85.3	65.3	70.13	51	71.94	49.78	71.56
2003	VA2	RIL	1	OH02-16216	77.77	58.34	80	22.77	23.91	14.2	9.33	53.98	102.79	100.49	48.21	77.31	61.1	71.54	58.22	73.27	57.06	74.13
2003	VA2	RIL	2	OH02-16309	75.9	56.95	80	24.76	24.1	14.42	10.16	58.86	102.8	94.71	54.12	89.28	66.46	69.05	56.37	71.24	54.9	71.73
2003	VA2	RIL	1	OH02-16161	78.54	58.9	80	24.4	26.76	14.2	10.24	54.41	102.82	94.12	52.77	87.3	62.15	69.5	51.87	71.23	50.71	71.01
2003	VA2	RIL	2	OH02-16188	79.9	59.92	80	24.3	27.01	14.51	10.15	54.88	102.86	94.79	52.4	84.5	64.99	69.63	51.51	72.02	49.9	71.66
2003	VA1	PARENT	1	PIO 26R46	77.5	58.1	80	22	26.74	14.44	9.83	51.94	102.93	97.11	48.9	82.51	58.96	72.5	53.9	74.73	52.4	74.8
2002	VA2	RIL	3	OH02-16309			37.72	13.55	10.8	15.09	9.32	53.4	103	100.711	52.2	91.1	63.8	64.08	55.32	67.73	52.87	67.88
2003	VA2	RIL	1	OH02-16188	80.79	60.6	80	23.15	27.77	14.35	10.42	53.24	103.01	93.1	52.43	85.72	63.91	71.06	51.15	73.11	49.78	72.73
2003	VA2	RIL	2	OH02-16226	76.6	57.47	80	25.22	25.73	14.43	9.79	56.57	103.04	97.48	52.36	86.93	65.05	68.48	53.03	70.68	51.55	70.61
2003	VA2	RIL	2	OH02-16179	76.72	57.56	80	26.82	24.03	14.34	10.79	58.6	103.06	90.55	55.23	88.5	69.41	66.48	54.81	68.5	53.46	68.74
2002	VA2	RIL	3	OH02-16289	80.5	60.4	80	23.66	24.53	14.22	10.21	50.1293	103.1	94.7	48.6	83.5	60.2	70.43	56.46	72.19	55.28	72.75
2004	VA2	RIL	4	OH02-16195	78.32	58.693	80	24.38	23.9	14.0656	9.6802	52.4978	103.106	98.3444	50.6312	86.3107	63.1362	69.525	57.0298	70.9558	56.0701	71.6477
2003	VA2	RIL	1	OH02-16186	74.2	55.69	80	25.52	22.42	14.51	9.55	55.63	103.17	99.31	50.28	83.66	63.34	68.1	58.85	70.48	57.25	71.37
2002	VA2	RIL	3	OH02-16227	79.37	59.5	80	22.31	27.63	14.42	10.35	50.9	103.2	93.74	50.8	81.6	60.1	72.11	52.11	74.3	50.64	74.07
2003	VA2	RIL	1	OH02-16306	77.78	58.35	80	25.1	23.2	15.13	9.69	56.45	103.21	98.38	49.78	84.26	64.29	68.63	57.74	72.35	55.24	72.9
2003	VA2	RIL	2	OH02-16275	78.78	59.09	80	24.85	25.56	14.71	10.33	56.44	103.25	93.91	51.4	84.16	63.64	68.94	53.65	71.77	51.76	71.72
2002	VA2	RIL	3	OH02-16299			57.81	16.85	19.15	13.74	9.9	52.7577	103.3	96.98	54	87.3	66.2	70.85	53.25	71.59	52.75	71.72
2003	VA2	PARENT	1	PIO 26R46	76.8	57.6	80	22.35	27.03	14.4	9.53	51.24	103.32	99.62	48.78	80.91	58.8	72.06	53.11	74.23	51.66	74.17
2003	VA2	RIL	2	OH02-16222	78.5	58.88	80	25.69	24.67	15.12	9.43	52.5	103.34	100.31	47.82	85.39	58.47	67.8875	54.5756	71.5927	52.0901	71.608
2002	VA2	RIL	3	OH02-16215	82.33	61.7	80	23.96	25.61	14.32	9.65	52.8	103.4	98.78	52.3	87.4	64.7	70.05	54.3	72.02	52.98	72.19
2002	VA2	RIL	3	OH02-16251	80.73	60.5	80	24.89	25.34	14.2	10.46	53	103.5	93.3	52	87.7	64	68.89	54.02	70.61	52.87	70.75
2004	VA2	RIL	4	OH02-16292	78.21	58.6106	80	23.75	24.71	14.2028	10.1842	52.0221	103.548	95.2582	50.9767	86.149	64.3646	70.3125	56.0711	72.0399	54.9123	72.535
2003	VA2	RIL	1	OH02-16310	76.15	57.14	80	27.08	22.21	14.77	10.07	57.7	103.551	96	53.3	93.1	71	66.15	58.03	69.11	56.05	69.8
2003	VA2	RIL	2	OH02-16312	77.01	57.78	80	25.64	22.92	15.27	9.12	53.43	103.61	102.76	48.25	85.92	60.86	67.95	57.8366	71.9756	55.1363	72.5087
2003	VA2	RIL	2	OH02-16295	76.86	57.66	80	26.82	23.32	14.62	9.65	57.26	103.66	99.08	52.2	87.19	66.81	66.48	56.15	69.1	54.39	69.51
2003	VA2	RIL	1	OH02-16309	77.41	58.1	80	24.99	24.82	13.99	10.18	54.67	103.76	95.49	53.83	86.04	63.8	68.76	54.88	70.03	54.03	70.37
2002	VA2	RIL	3	OH02-16257	82.59	61.9	80	23.02	26.1	14.5	10.03	51.2	103.8	96.57	49.7	80.6	60.5	71.23	54.19	73.59	52.61	73.69
2003	VA2	RIL	2	OH02-16235	76.78	57.6	80	24.2	27.29	15.05	10.35	52.99	103.82	94.38	49.54	86.39	59.36	69.75	51.0932	73.3033	48.7096	72.7439
2003	VA2	PARENT	1	PIO 26R61	79.25	59.4	80	25.71	23.89	14.14	10.2	55.53	103.82	95.44	53.83	93.09	66.55	67.86	56	69.46	54.92	69.96
2003	VA2	RIL	2	OH02-16218	76.89	57.69	80	25.91	26.97	15.31	9.92	52	103.83	97.37	49.62	81.49	57.78	67.6125	50.1387	71.7233	47.3811	70.9381
2003	VA2	RIL	2	OH02-16237	72.92	54.73	80	25.36	24.5	14.29	10.71	52.91	103.83	91.83	51.9	89.57	64.48	68.3	55.16	70.22	53.87	70.54
2003	VA2	RIL	2	OH02-16186	74.14	55.64	80	25.93	22.88	14.34	9.66	53.38	103.85	99.24	50.24	88.15	63.54	67.59	57.68	69.6	56.33	70.34
2003	VA2	RIL	2	OH02-16281	77.4	58.07	80	23.52	25.64	14.3	10.24	53.44	103.92	95.22	51.53	85.28	62.91	70.6	54.6	72.53	53.31	72.75
2003	VA2	RIL	1	OH02-16302	74.54	55.94	80	24.83	22.15	14.46	9.88	56.49	104.05	97.91	50.27	87.13	64.93	68.96	59.85	71.24	58.32	72.32
2002	VA2	RIL	3	OH02-16173	81.74	61.3	80	24.72	24.99	14.18	9.45	51.7	104.1	100.9	51	88	61.7	69.1	54.79	70.78	53.67	71.06
2002	VA2	RIL	3	OH02-16188	81.52	61.1	80	24.12	26.58	14.17	9.75	51.2	104.1	98.86	51.7	84.8	60.3	69.85	52.43	71.5	51.32	71.39
2003	VA2	RIL	1	OH02-16226	77.11	57.8	80	24.25	26.69	14.1	10.19	54.13	104.17	95.84	52.37	85.86	64.48	69.69	52.13	71.2	51.11	71.05
2003	VA2	RIL	2	OH02-16273	76.25	57.21	80	26.97	23.59	15.32	9.46	52.86	104.2	100.99	48.83	87.41	60.53	66.2875	55.5157	70.4385	52.7312	70.5628
2002	VA2	RIL	3	OH02-16167			74.21	21.47	25.13	13.87	10.19	50.2	104.2	95.87	50.7	81.5	59.5	71.07	52.35	72.07	51.68	72.02
2003	VA2	RIL	1	OH02-16307	75.84	56.9	80	25.3	25.56	14.14	10.5	53.48	104.21	93.69	52.65	84.31	64.85	68.38	53.27	69.97	52.2	70
2003	VA2	RIL	1	OH02-16163	75.3	56.5	80	25.84	23.69	14.11	10.36	54.62	104.35	94.83	51.28	82.59	64.73	67.7	56.26	69.23	55.23	69.78
2003	VA2	RIL	2	OH02-16173	76.15	57.14	80	25.42	22.38	14.32	9.03	55.55	104.36	104.17	51.27	87.01	66.43	68.23	59	70.21	57.67	71.17
2002	VA2	RIL	3	OH02-16313	80.75	60.6	80	24.28	24.4	14.21	9.32	49.8	104.4	102.2	48.6	78.4	58.6	69.65	56.21	71.39	55.04	71.91
2002	VA2	RIL	3	OH02-16259	80.16	60.1	80	23.23	26.96	14.42	9.35	52.5	104.4	101.9	52	83.7	61.7	70.96	52.51	73.15	51.04	72.99
2004	VA2	RIL	4	OH02-16224	78.45	58.7904	80	22.26	25.64	14.3629	9.6521	50.9726	104.471	99.9063	49.8823	82.6473	61.3712	72.175	55.594	74.2486	54.2031	74.6231
2003	VA2	PARENT	2	PIO 26R61	79.7	59.78	80	26.69	23.98	14.4	10.51	56.96	104.52	93.96	53.33	89.35	68.11	66.64	55.02	68.79	53.57	69.06
2003	VA2	RIL	1	OH02-16173	77.84	58.39	80	25.04	22.49	14.63	8.89	56.02	104.55	105.34	51.04	86.1	66.68	68.7	59.08	71.34	57.31	72.24
2004	VA2	RIL	4	OH02-16276	78.24	58.6331	80	25.08	23.34	14.0601	9.4572	53.0829	104.568	101.367	50.7826	85.1314	64.6801	68.65	57.5018	70.0689	56.55	70.8424
2002	VA2	RIL	3	OH02-16287			77.7	22.19	26	13.99	10.09	49.3443	104.6	96.93	49.8	82.1	59.9	71.44	53.16	72.71	52.31	72.77
2003	VA2	RIL	1	OH02-16243	77.52	58.2	80	25.93	25.83	14.17	10.11	53.63	104.6	96.86	52.05	86.46	62.38	67.59	52.23	69.23	51.12	69.08
2002	VA2	RIL	3	OH02-16216	79.25	59.4	80	21.71	24.35	14.34	9.28	51.2	104.7	102.71	48.7	81.3	60.8	72.86	58.23	74.89	56.87	75.72
2002	VA2	RIL	3	OH02-16164	81.99	61.5	80	24.28	27.79	14.09	10.81	51.2	104.8	92.12	52.7	86.3	61.9	69.65	50.13	71.14	49.13	70.65
2003	VA2	RIL	1	OH02-16212	74.66	56.03	80	26.04	22.49	14.84	9.9	76.31	104.82	98.51	52.97	90.46	66.44	67.45	58.32	70.56	56.23	71.28
2003	VA2	RIL	1	OH02-16312	77.3	57.99	80	22.76	23.92	13.88	9.54	53.78	104.83	101.07	48.48	78.94	63.07	71.55	58.21	72.57	57.52	73.51
2003	VA1	PARENT		VA96W-247	77.21	57.9	80	26.24	23.04	14.31	10.17	56.5	104.9	96.73	53.4	90.7	68.1	67.2	57.14	69.16	55.83	69.81
2002	VA2	RIL	3	OH02-16196	82.85	62.1	80	21.77	31.85	14.22	10.29	50.9	105	95.96	52	83.2	59.9	72.79	45.3	74.55	44.12	73.21
2003	VA2	RIL	2	OH02-16284	77.8	58.36	80	24.39	24.62	14.28	9.5	54.61	105.14	101.63	52.19	85.75	66.7	69.51	55.73	71.4	54.46	71.82
2004	VA2	RIL	4	OH02-16257	78.41	58.7605	80	24.84	22.2	14.0805	9.247	52.9061	105.161	103.432	50.1556	84.6716	66.1956	68.95	59.7534	70.413	58.772	71.5643
2003	VA2	RIL	1	OH02-16208	75.1	56.36	80	26.64	24.67	14.89	10.02	56.31	105.2	98.05	52.88	87.63	65.47	66.7	53.77	69.9	51.62	69.84
2002	VA2	RIL	3	OH02-16234	81.99	61.5	80	23.26	30.25	14.29	10.63	50.7	105.2	93.8	51.9	83	60	70.93	46.69	72.84	45.4	71.72
2003	VA2	RIL	1	OH02-16223	76.92	57.71	80	24.03	26.3	14.43	10.06	55.19	105.28	97.85	52.13	86.5	63.68	69.96	53.01	72.19	51.52	72.11
2003	VA2	RIL	2	OH02-16243	75.66	56.77	80	25.58	25.8	14.58	10.07	57.4	105.36	97.9	53.17	87.73	63.85	68.03	52.59	70.57	50.88	70.38
2002	VA2	RIL	3	OH02-16277	80.22	60.2	80	22.1	28.69	14.18	9.77	53.2119	105.4	100.03	52.1	85.5	60.1	72.38	50.45	74.05	49.32	73.6
2003	VA2	RIL	1	OH02-16286	78.2	58.7	80	24.07	25.53	14.21	9.81	53.1	105.53	99.89	49.46	81.11	61.19	69.91	54.35	71.65	53.19	71.85
2003	VA2	RIL	2	OH02-16269	77.08	57.83	80	23.58	25.77	14.32	10.3	53.71	105.54	96.45	51.78	88.41	62.99	70.53	54.32	72.51	52.99	72.68
2002	VA2	RIL	3	OH02-16294	79.57	59.7	80	24.35	25.32	14.13	9.79	51.696	105.6	100.11	50.8	85.3	62.2	69.56	54.5	71.13	53.45	71.38
2003	VA2	RIL	2	OH02-16286	78.54	58.91	80	25	25.2	14.43	9.68	55.05	105.69	100.92	49.27	83.27	63.3	68.75	54.18	70.97	52.7	71.08
2002	VA2	RIL	3	OH02-16177	77.88	58.4	80	25.27	26.94	14.34	10.11	53.1	105.7	97.86	52.6	85.6	63.1	68.41	50.78	70.44	49.42	70
2003	VA2	RIL	1	OH02-16233	75.96	56.99	80	24	27.14	14.5	10.66	53.83	105.78	94.18	50.86	81.11	64.04	70	51.54	72.38	49.94	72.03
2003	VA2	RIL	1	OH02-16172	77.98	58.5	80	24.7	25.27	15.06	10.09	54.02	105.84	98.23	50.15	86.33	61.88	69.13	54.3	72.7	51.91	72.68
2003	VA2	RIL	1	OH02-16218	77.16	57.89	80	23.74	27.44	14.54	10.3	54.43	105.86	96.75	50.04	82.29	62.3	70.33	51.23	72.77	49.59	72.36
2002	VA2	RIL	3	OH02-16192	82.03	61.5	80	23.69	28.44	14.06	9.66	52.4	106	101.45	53.7	85.6	62.6	70.39	49.49	71.8	48.54	71.22
2004	VA2	RIL	4	OH02-16266	79.52	59.5923	80	24.74	22.58	14.6926	9.272	54.2888	106.109	104.205	50.9035	88.9285	64.8539	69.075	59.1386	71.8614	57.2695	72.7572
2003	VA2	RIL	1	OH02-16252	76.46	57.37	80	24.44	26.65	15.11	10.51	55.01	106.12	95.56	50.01	83.38	61.97	69.45	52.03	73.14	49.56	72.73
2003	VA2	RIL	2	OH02-16166	74.4	55.83	80	26.6	23.33	15.2	10.27	56.16	106.14	97.25	49.86	85.58	62.24	66.75	56.3109	70.6402	53.7013	70.9294
2003	VA2	RIL	1	OH02-16269	78.52	58.9	80	22.2	26.06	13.91	10.22	54.27	106.23	97.71	50.86	86.37	61.96	72.25	54.91	73.35	54.18	73.72
2003	VA2	RIL	1	OH02-16311	75.03	56.3	80	26.82	21.75	14.61	10.34	56.05	106.29	96.9	52.27	92.07	68.73	66.48	59.1	69.09	57.35	70
2003	VA2	RIL	2	OH02-16206	75.19	56.42	80	26.59	22.8	14.59	9.98	60.46	106.31	99.47	53.79	87.85	67.92	66.76	57.31	69.32	55.6	69.93
2003	VA2	RIL	2	OH02-16230	77.73	58.31	80	25.06	26.46	14.49	9.76	56.69	106.36	101.07	52.04	84.81	64.57	68.68	51.84	71.01	50.27	70.72
2003	VA2	RIL	1	OH02-16178	79.67	59.8	80	24.39	25.87	14.32	10.61	53.34	106.39	95.09	51.54	85.11	62.31	69.51	53.48	71.5	52.15	71.52
2003	VA2	RIL	1	OH02-16297	77.58	58.2	80	24.98	26.85	14.81	10.64	57.7	106.428	95	53.2	86	66.2	68.78	51.2	71.81	49.17	71.33
2003	VA2	RIL	2	OH02-16234	77.66	58.26	80	27.26	27.25	15.23	10.13	52.96	106.43	98.55	50.85	84.64	59.93	65.925	48.3314	69.8784	45.6795	68.8039
2003	VA2	RIL	1	OH02-16221	77.52	58.15	80	23.44	26.09	14.41	9.94	54.29	106.56	100.01	49.47	79.31	61.31	70.7	53.87	72.87	52.42	72.94
2003	VA2	RIL	2	OH02-16290	77.54	58.17	80	25.52	24.57	14.51	10.07	57.47	106.6	99.09	53.81	88.03	65.88	68.1	54.9	70.49	53.3	70.71
2004	VA2	RIL	4	OH02-16312				13.62	14.85	14.2582	10.7583	53.0439	106.834	94.526	49.8914	81.1538	63.0335		209.031	1.84721	207.792	28.3318
2003	VA2	RIL	1	OH02-16265	76.22	57.19	80	24.64	26.6	15.07	10.39	56.58	106.85	97.12	50.9	90.21	63.54	69.2	51.95	72.8	49.54	72.38
2002	VA2	RIL	3	OH02-16235	80.28	60.2	80	21.84	31.17	14.26	10.75	50.4	106.9	94.67	51.7	81.5	59.2	72.7	46.41	74.56	45.16	73.4
2002	VA2	RIL	3	OH02-16303	82.87	62.1	80	24.13	25.69	14.28	9.75	52.2071	107	101.74	51.6	87.1	63.2	69.84	54.02	71.72	52.75	71.85
2003	VA2	RIL	1	OH02-16224	77.14	57.87	80	22.73	25.9	13.57	10.44	53.74	107.11	97.06	50.46	81.6	62.86	71.59	54.78	71.95	54.53	72.38
2003	VA2	RIL	2	OH02-16317	74.3	55.76	80	28.69	21.07	14.51	9.91	60.79	107.26	100.9	53.81	94.42	72.13	64.14	58.94	66.54	57.32	67.45
2003	VA2	RIL	2	OH02-16299	78.57	58.94	80	25.64	23.3	14.23	9.26	56.73	107.38	105.56	51.41	90.75	68.13	67.95	57.14	69.73	55.94	70.4
2002	VA2	RIL	3	OH02-16269	80.9	60.7	80	22.09	27.15	14.34	10.36	50.2753	107.4	97.83	50.8	84.4	59.7	72.39	53.12	74.41	51.76	74.37
2002	VA2	RIL	3	OH02-16281	80.66	60.5	80	23.2	27.48	14.22	10.93	52.7239	107.4	93.92	51.7	86.9	59.6	71	51.62	72.77	50.43	72.5
2004	VA2	RIL	4	OH02-16176	77.71	58.2359	80	25.72	22.4	14.2827	10.0244	55.8213	107.413	100.242	53.7272	90.6469	69.6723	67.85	58.7325	69.7502	57.4578	70.678
2003	VA2	RIL	2	OH02-16162	76.9	57.69	80	26.46	24.65	14.35	10.59	59.76	107.46	96.3	55.16	90.94	67.89	66.93	53.96	68.98	52.58	69.08
2002	VA2	RIL	3	OH02-16292	81.35	61	80	24.64	27.25	14.13	10.24	50.5813	107.5	98.83	52.7	85.6	60.6	69.2	50.78	70.77	49.72	70.39
2003	VA2	RIL	2	OH02-16223	76.25	57.21	80	24.57	26.52	14.24	10.09	55.54	107.53	99.91	51.35	84.14	62.58	69.29	52.16	71.09	50.94	70.91
2003	VA2	RIL	2	OH02-16232	75.71	56.81	80	25.19	24.57	14.25	11.29	53.82	107.53	91.49	50.54	85.66	63.43	68.51	55.17	70.35	53.94	70.68
2002	VA2	RIL	3	OH02-16181			62.92	18.94	20.54	13.93	9.98	52.3	107.6	100.76	53.3	86.1	62.6	69.9	53.3	71.03	52.54	71.12
2003	VA2	RIL	2	OH02-16262	76.57	57.45	80	26.29	23.43	14.4	10.06	56.28	107.61	100.23	53.5	89.22	67.86	67.14	56.38	69.29	54.93	69.79
2003	VA2	RIL	2	OH02-16203	76.85	57.66	80	27.01	22.2	15.19	9.29	52.89	107.62	105.6	47.44	83.49	60.65	66.2375	58.1053	70.0923	55.5195	70.6906
2002	VA1	PARENT	3	PIO 26R61	84.91	63.6825	50	15.81	16.61	14.4081		54.2037	107.626	96.8638	53.2942	88.146	62.1213	68.38	51.4185	70.5512	49.9621
2003	VA2	RIL	1	OH02-16316	76.57	57.45	80	25.5	24.55	13.94	10.21	56.85	107.7	99.23	53.03	86.42	66.32	68.13	54.95	69.29	54.17	69.66
2003	VA2	RIL	2	OH02-16307	77.16	57.89	80	24.94	25.77	14.48	9.97	57.33	107.72	100.94	52.39	84.44	63.31	68.83	53.2	71.15	51.64	71.09
2003	VA2	RIL	1	OH02-16298	75.38	56.6	80	24.07	26.25	13.81	10.49	53.01	107.79	97.34	50.65	83.29	62.08	69.91	53.07	70.78	52.48	70.86
2003	VA2	RIL	2	OH02-16297	77.06	57.81	80	25.73	26.58	14.54	10.12	57.72	107.84	100	52.61	86.36	66.3	67.84	51.02	70.3	49.37	69.86
2003	VA2	RIL	1	OH02-16192	78.5	58.88	80	24.19	25.59	14.32	9.23	56.3	107.87	106.28	52.96	86.29	66.08	69.76	54.15	71.75	52.82	71.89
2003	VA2	RIL	1	OH02-16181	75.37	56.6	80	25.05	24.45	14.08	9.85	54.06	107.88	101.91	52.54	86.51	64.5	68.69	55.51	70.15	54.53	70.58
2004	VA2	RIL	4	OH02-16301	78.88	59.1127	80	24.27	26.69	14.1319	10.6761	52.4872	108.017	96.2841	51.2849	88.3108	63.969	69.6625	52.1084	71.2366	51.0524	71.0756
2003	VA2	RIL	1	OH02-16234	76.79	57.61	80	25.37	27.22	14.92	10.34	57.03	108.09	98.69	51.72	84.01	63.61	68.29	50.17	71.57	47.97	70.89
2003	VA2	RIL	1	OH02-16263	75.07	56.33	80	24.59	23.99	14.52	9.96	55.68	108.1	101.41	50.79	86.53	63.38	69.26	56.7	71.69	55.08	72.21
2003	VA2	RIL	2	OH02-16192	78.74	59.06	80	27.09	24.21	15.14	8.86	54.97	108.15	109.12	51.16	90.17	63.51	66.1375	54.2431	69.8812	51.7317	69.8356
2003	VA2	RIL	2	OH02-16301	79.25	59.44	80	23.98	27.18	14.27	9.69	53.74	108.23	103.43	50.55	83.26	64.05	70.03	51.48	71.89	50.23	71.59
2003	VA2	RIL	2	OH02-16302	73.42	55.11	80	25.47	22.29	14.35	10.06	53.79	108.34	100.94	50.85	85.3	65.76	68.16	59.12	70.21	57.75	71.19
2003	VA2	RIL	2	OH02-16195	77.52	58.15	80	24.74	24.11	14.28	9.01	54.32	108.38	108.34	50.25	84.48	63.08	69.08	56.37	70.98	55.09	71.5
2003	VA2	RIL	2	OH02-16289	76.29	57.24	80	24.63	23.11	14.23	10.3	53.78	108.39	99.32	50.24	84.74	62.76	69.21	58.26	71.01	57.06	71.87
2003	VA2	PARENT		VA96W-247			20.04	6.99	5.94	13.78	10.54	60.5	108.39	97.61	53.55	93.97	70.18	65.12	54.48	65.93	53.94	66.26
2002	VA2	RIL	3	OH02-16266	82.4	61.8	80	23.05	25.3	14.43	9.57	51.6205	108.4	104.36	50.2	84.6	61.5	71.19	55.58	73.4	54.09	73.75
2002	VA2	RIL	3	OH02-16222	82.14	61.6	80	22.09	27.69	14.28	10.15	51.5	108.4	100.39	50.2	82.4	60	72.39	52.18	74.28	50.91	74.1
2002	VA2	RIL	3	OH02-16268			77.63	22.58	25.6	14	10.35	51.132	108.4	98.95	50.6	83.2	60.7	70.91	53.5	72.2	52.64	72.3
2002	VA1	PARENT	3	PIO 26R61	84.16	63.12	50	15.77	16.09	14.4675		53.1217	108.426	97.5837	53.4275	87.5213	61.2245	68.46	52.9944	70.7597	51.4518
2003	VA2	RIL	1	OH02-16290	77.22	57.9	80	25.91	24.3	14.41	10.3	53.85	108.49	99.37	52.54	86.69	63.44	67.61	55.07	69.78	53.62	70.05
2003	VA2	RIL	1	OH02-16237	74.36	55.8	80	25.91	22.94	14.61	10.39	55.88	108.6	98.84	51.22	88.88	65.15	67.61	57.59	70.21	55.84	70.87
2003	VA2	RIL	1	OH02-16204	76.14	57.1	80	24.38	24.7	13.98	9.65	54.57	108.67	104.13	52.53	87.28	65.07	69.53	55.59	70.77	54.75	71.24
2003	VA2	RIL	2	OH02-16181	76.2	57.17	80	25.05	25.03	14.41	9.83	57.65	108.68	102.86	54.05	88.52	64.26	68.69	54.45	70.87	52.99	71.03
2003	VA2	RIL	1	OH02-16254	74.7	56.06	80	25.08	22.66	14.08	9.53	57.41	108.74	105.01	52.64	86.57	67.29	68.65	58.74	70.11	57.76	71.09
2002	VA2	RIL	3	OH02-16265	79.36	59.5	80	22.97	27.74	14.34	10.79	51.4771	108.8	96.3	52	84.2	60.1	71.29	51.36	73.32	50	72.98
2003	VA2	RIL	1	OH02-16275	77.93	58.46	80	23.9	27.25	14.69	11.05	55	108.833	94.5	50.2	90.8	63.2	70.13	51.43	72.9	49.56	72.49
2003	VA2	RIL	2	OH02-16185	78.02	58.53	80	25.61	25.65	14.55	10.71	56.66	108.89	96.89	52.83	89.87	65.47	67.99	52.84	70.47	51.18	70.33
2003	VA2	RIL	1	OH02-16222	78.99	59.25	80	23.2	26	14.58	9.53	54.06	109.01	105.31	48.6	79.6	61.13	71	54.23	73.54	52.52	73.63
2003	VA2	RIL	2	OH02-16316	74.69	56.05	80	28.81	22.98	15.15	9.68	55.9	109.02	104.24	52.79	91.8	64.62	63.9875	55.1084	67.77	52.5711	67.867
2003	VA2	RIL	1	OH02-16262			69.15	23.7	19.18	15.1	9.85	59.58	109.03	103.1	53.57	96.01	69.87	65.73	57.8	69.4	55.34	69.97
2003	VA2	RIL	2	OH02-16204	75.37	56.56	80	25.99	23.41	14.37	9.32	56.18	109.11	106.88	51.42	87.34	66.55	67.51	56.66	69.61	55.25	70.16
2002	VA2	RIL	3	OH02-16224			43.01	11.58	15.06	13.77	10.72	50	109.2	97.12	51.3	80.4	58.5	73.08	52.08	73.87	51.55	73.79
2003	VA2	RIL	1	OH02-16191	77.33	58.01	80	24.24	26.5	14.53	10.44	53.88	109.21	99.11	50.86	84.4	63.73	69.7	52.47	72.13	50.85	71.93
2003	VA2	RIL	2	OH02-16265	76.49	57.39	80	24.57	27.08	14.53	10.25	56.06	109.36	100.63	50.36	84.01	63.49	69.29	51.15	71.71	49.52	71.29
2003	VA2	RIL	2	OH02-16233	75.06	56.33	80	25.81	25.91	15.18	10.4	53.89	109.41	99.6	48.64	82.53	57.98	67.7375	52.1868	71.5745	49.6128	71.1687
2003	VA2	RIL	1	OH02-16217	78.32	58.75	80	26.81	23.93	14.9	10.16	58.21	109.42	101.28	54.77	93.59	67.91	66.49	55.01	69.72	52.84	69.86
2003	VA2	RIL	2	OH02-16221	76.24	57.2	80	26.26	24.28	14.94	10.31	52.8	109.48	100.3	49.46	86.11	60.49	67.175	54.8195	70.4966	52.5913	70.5971
2003	VA2	RIL	1	OH02-16182	79.31	59.49	80	24.95	25.87	14.42	9.84	55.25	109.51	103.6	49.51	80.05	61.74	68.81	53.01	71.01	51.53	70.93
2003	VA2	RIL	2	OH02-16205	75	56.28	80	25.07	24.36	14.4	9.43	56.23	109.65	106.63	51.08	87.92	64.52	68.66	55.65	70.82	54.2	71.2
2003	VA2	RIL	1	OH02-16318	77.74	58.32	80	25.9	24	14.84	10.16	57.65	109.67	101.55	52.47	89.9	67.28	67.63	55.64	70.72	53.56	70.99
2003	VA2	RIL	1	OH02-16175	80.27	60.2	80	23.35	28.24	14.13	10.41	54.53	109.85	100.01	51.27	86.09	62.29	70.81	50.15	72.37	49.1	71.88
2003	VA1	PARENT	2	PIO 26R61	78.21	58.7	80	26.45	22.66	14.25	10.54	58.74	109.97	99.22	54.49	93.29	68.16	66.94	57.68	68.77	56.46	69.53
2003	VA2	RIL	2	OH02-16263	74.29	55.75	80	24.94	23.79	14.29	10.33	52.65	109.99	100.68	50.58	85.71	63.05	68.83	56.79	70.75	55.5	71.34
2004	VA2	RIL	4	OH02-16169	79.02	59.2176	80	25.5	26.04	13.9912	10.4671	54.7048	110.009	99.7388	53.7816	90.916	64.1107	68.125	52.2202	69.3949	51.3683	69.2876
2003	VA2	RIL	1	OH02-16206	74.77	56.1	80	26.24	22.61	14.06	10.53	56.18	110.06	99.31	55.63	95.79	69.99	67.2	57.94	68.62	56.99	69.47
2003	VA2	RIL	2	OH02-16318	77.33	58.01	80	25.54	24.43	14.41	10.48	54.84	110.17	99.78	53.44	88.09	67.89	68.08	55.14	70.26	53.68	70.54
2003	VA2	RIL	2	OH02-16208	75.76	56.85	80	25.19	25.08	14.08	10.2	54.1	110.37	101.97	51.18	85.26	65.36	68.51	54.24	69.97	53.26	70.19
2003	VA2	RIL	1	OH02-16299	78.64	59	80	24.84	23.87	14.4	9.32	55.72	110.46	108.2	52.05	89.02	66.15	68.95	56.73	71.09	55.29	71.65
2003	VA2	RIL	1	OH02-16177	75.13	56.38	80	27.79	21.1	14.62	10.5	59.42	110.56	100.04	53.9	91.39	72.16	65.26	59.59	67.9	57.82	68.89
2003	VA2	RIL	2	OH02-16191	77.67	58.27	80	26.51	25.79	15.26	9.94	54.09	110.6	103.99	49.39	82.51	58.61	66.8625	51.7854	70.879	49.0911	70.3845
2003	VA2	RIL	1	OH02-16210	76.53	57.42	80	27.42	19.97	14.64	9.78	60.62	110.64	105.21	53.96	96.53	72.02	65.73	62.02	68.4	60.23	69.8
2003	VA2	RIL	2	OH02-16175	79.21	59.41	80	24.98	26.3	14.32	10.2	54.05	110.64	102.26	50.27	83.62	63.73	68.78	52.2	70.76	50.87	70.56
2003	VA2	RIL	2	OH02-16174	78.15	58.62	80	27.29	24.6	15.3	9.3	53.8	110.66	108.58	50.27	86.69	60.95	65.8875	53.3295	69.9801	50.5842	69.7395
2003	VA2	RIL	2	OH02-16236	76.09	57.09	80	25.48	23.83	14.62	9.74	57.75	110.66	105.46	54.8	89.23	65.76	68.15	56.29	70.77	54.53	71.2
2003	VA2	RIL	2	OH02-16257	80.11	60.08	80	24.44	24.41	14.26	9.18	53.94	110.75	109.51	49.07	85.87	63.79	69.45	56.07	71.3	54.83	71.78
2003	VA2	RIL	1	OH02-16294	75.29	56.5	80	24.34	23.68	13.89	9.48	56.59	110.96	107.58	51.25	84.14	65.96	69.58	57.46	70.62	56.76	71.43
2003	VA2	RIL	2	OH02-16238	76.98	57.75	80	25.52	25.84	14.55	10.84	57	110.97	98.11	51.99	91.65	63.04	68.1	52.57	70.57	50.91	70.39
2003	VA2	RIL	1	OH02-16259	76.1	57.1	80	24.58	24.95	14.28	10.34	55.58	111.18	101.78	52.31	84.16	66.05	69.28	54.98	71.18	53.7	71.47
2002	VA2	RIL	3	OH02-16305			43	12.39	14.62	13.83	10.75	49.5409	111.2	99	50.7	82.9	59.5	71.19	52.24	72.1	51.62	72.04
2002	VA2	RIL	3	OH02-16162	80.93	60.7	80	26.06	25.47	14.13	11.45	54	111.5	94.29	54.8	90.6	67.7	67.43	52.78	69	51.72	68.95
2003	VA2	RIL	1	OH02-16264	73.82	55.4	80	25.84	22.96	14.74	9.59	56.97	111.73	107.6	51.49	87.55	65.52	67.7	57.61	70.59	55.67	71.21
2002	VA2	RIL	3	OH02-16195	81.8	61.3	80	23.57	26.87	14.17	10.06	51.1	111.8	104.44	50.2	83.9	58.8	70.54	52.38	72.19	51.27	72.07
2003	VA2	RIL	1	OH02-16174	78.84	59.14	80	23.44	26.17	14.06	9.76	54.93	111.9	106.57	51.26	82.1	63.46	70.7	53.73	72.12	52.78	72.25
2003	VA2	RIL	2	OH02-16217	74.27	55.74	80	24.94	24.6	14.32	10.44	54.6	112.03	101.92	51.64	85.13	63.23	68.83	55.32	70.8	53.99	71.14
2003	VA2	RIL	2	OH02-16264	73.3	55.02	80	25.73	23.3	14.33	9.79	54.34	112.05	106.51	52.37	87.41	67.21	67.84	57.07	69.85	55.72	70.48
2003	VA2	RIL	1	OH02-16257	79.79	59.8	80	23.01	25.04	14.01	9.25	54.07	112.32	110.61	48.55	84.95	62.65	71.24	56.06	72.55	55.18	73.1
2003	VA2	RIL	1	OH02-16209	79.03	59.3	80	23.97	25.9	14.17	10.2	53.76	112.47	104.09	51.61	87.96	63.02	70.04	53.77	71.69	52.67	71.8
2003	VA2	RIL	2	OH02-16164	78.32	58.75	80	27.02	25.9	15.23	10.24	53.72	112.47	103.79	51.54	86.33	60.07	66.225	51.1136	70.1816	48.4595	69.5797
2004	VA2	RIL	4	OH02-16296	80.05	59.9895	80	25.92	23.29	14.2377	9.8027	54.4001	112.502	106.883	53.0087	89.493	68.3033	67.6	56.9342	69.4029	55.7248	70.0361
2003	VA2	RIL	2	OH02-16182	77.88	58.42	80	26.9	24.37	14.97	9.93	52.68	112.68	106.17	49.04	86.14	60.8	66.375	54.1055	69.7601	51.8347	69.732
2003	VA2	RIL	1	OH02-16198	77.18	57.9	80	25.14	22.99	14.64	10	54.05	112.77	105.78	49.79	84.63	62.76	68.58	58.09	71.25	56.3	71.99
2003	VA2	RIL	1	OH02-16248	75.96	56.99	80	25.79	24.83	14.72	10.53	55.75	112.97	102.25	51.96	85.69	67.29	67.76	54.2	70.6	52.29	70.65
2003	VA2	RIL	1	OH02-16203	76.35	57.28	80	24.63	22.69	14.36	9.8	54.19	113.06	107.49	48.2	82.24	61.61	69.21	59.02	71.28	57.63	72.24
2003	VA2	RIL	1	OH02-16277	75.02	56.3	80	25.09	26.09	14.26	10.41	54.39	113.2	103.36	53.2	83.96	64.62	68.64	52.49	70.49	51.25	70.36
2003	VA2	RIL	2	OH02-16303	77.42	58.08	80	25.35	23.52	14.46	9.52	55.53	113.21	109.56	50.03	88.74	64.96	68.31	56.96	70.59	55.43	71.18
2003	VA2	RIL	1	OH02-16305	77	57.77	75.59	22.47	23.53	13.87	10.99	53.7	113.23	99.32	50.63	86.19	63.79	70.27	55.7	71.29	55.02	71.8
2003	VA2	RIL	2	OH02-16294	75.17	56.41	80	28.55	22.8	15.31	9.02	56.13	113.32	113.15	51.19	89.09	64.89	64.3125	55.6851	68.4409	52.9158	68.5966
2003	VA2	RIL	1	OH02-16195	78.82	59.1	80	23.65	25.7	14.15	9.55	53.43	113.33	109.49	51.27	84.19	61.76	70.44	54.39	72.04	53.31	72.27
2003	VA2	RIL	2	OH02-16210	75.9	56.95	80	27.53	19.99	14.39	10.29	61.92	113.34	104.33	55.76	97.62	73.7	65.59	61.9	67.71	60.48	69.15
2002	VA2	RIL	3	OH02-16205	79.82	59.9	80	25.05	27.86	14.32	10.09	52.9	113.4	105.76	52.5	87	61.5	68.69	49.3	70.66	47.97	69.98
2004	VA2	RIL	4	OH02-16209	77.14	57.8087	80	24.98	23.84	14.0474	10.4823	53.4286	113.571	103.195	51.8421	91.7498	67.2057	68.775	56.6703	70.1664	55.7369	70.8017
2003	VA2	RIL	1	OH02-16162	77.24	57.9	80	26.41	24.37	14.25	10.95	57.26	113.62	99.93	56	91.6	67.82	66.99	54.53	68.81	53.3	69.04
2003	VA2	RIL	2	OH02-16313	77.03	57.79	80	25.94	22.47	14.34	9.63	55.9	113.73	109.29	50.4	83.91	62.54	67.58	58.44	69.59	57.08	70.46
2003	VA2	RIL	1	OH02-16214	76.52	57.41	80	26.04	24.02	14.65	11.25	55.78	113.73	98	51.49	86.69	62.95	67.45	55.49	70.15	53.68	70.43
2003	VA2	RIL	1	OH02-16164	77.31	58	80	25.59	25.79	14.5	10.89	55.3	113.74	100.53	52.65	85.11	65.39	68.01	52.6	70.38	51.01	70.22
2003	VA2	RIL	2	OH02-16209	78.51	58.89	80	24.69	25.1	14.32	9.91	57.07	114.04	107.67	51.31	86.44	65.09	69.14	54.62	71.12	53.29	71.34
2003	VA2	RIL	1	OH02-16236	76.72	57.6	80	25.36	23.78	14.19	10.06	55.41	114.12	106.73	53.92	89.6	66.06	68.3	56.48	69.99	55.34	70.56
2003	VA2	RIL	2	OH02-16277	74.92	56.22	80	27.21	24.83	14.99	10.12	53.85	114.19	106.35	51.71	89.85	63.65	65.9875	52.9646	69.4094	50.6691	69.1831
2002	VA2	RIL	3	OH02-16174	81.23	60.9	80	23.49	26.41	14.14	10.07	51	114.4	106.93	50.4	84.5	59.6	70.64	53.26	72.23	52.2	72.26
2002	VA2	RIL	3	OH02-16217			70.64	19.78	24.19	14.11	10.69	51.6	114.4	102.5	52	83.7	60.6	72	52.44	73.53	51.41	73.43
2003	VA2	RIL	2	OH02-16298	75.34	56.53	80	25.24	25.38	14.29	10.39	55.23	114.49	104.76	50.21	85.63	61.89	68.45	53.65	70.38	52.36	70.44
2003	VA2	RIL	1	OH02-16266	77.12	57.86	80	24.82	24.29	14.55	9.78	55.15	114.65	109.19	51.19	91.87	65.55	68.98	55.98	71.46	54.31	71.85
2003	VA2	RIL	1	OH02-16292	78.84	59.14	80	25.1	25.63	14.58	10.32	55.56	114.71	105.45	51.31	87.52	64.08	68.63	53.32	71.17	51.61	71.11
2002	VA2	RIL	3	OH02-16185			34.4	11.42	12.45	13.62	12.63	54.8	115	89.6	56	88.8	66.1	66.8	45.82	67.27	45.51	66.17
2003	VA2	RIL	1	OH02-16245			74.45	24.83	20.52	14.85	10.34	57.04	115.17	105.76	52.92	92.17	66.63	66.65	58.65	69.78	56.54	70.56
2003	VA2	RIL	1	OH02-16185	78.45	58.8	80	25.12	25.78	14.14	11.05	53.51	115.17	100.79	52.52	89.41	63.99	68.6	53.02	70.2	51.95	70.19
2002	VA2	RIL	3	OH02-16276	80.83	60.6	80	24.01	27.49	14.15	10.81	51.6292	115.5	102.85	50.6	86.3	59.8	69.99	50.9	71.59	49.83	71.22
2003	VA2	RIL	1	OH02-16258	76.57	57.45	80	27.39	21.18	11.97	11.22	62.93	115.8	100.24	56.29	101.18	75.36	65.76	59.74	62.66	61.82	64.33
2003	VA2	RIL	2	OH02-16254	74.75	56.09	80	28.77	21.22	15.21	9.42	59.75	115.94	113.03	53.02	95.99	69.66	64.0375	58.579	67.9461	55.9571	68.6188
2003	VA2	RIL	2	OH02-16268	74.65	56.02	80	26.59	23.95	14.16	11.06	57.15	115.95	101.5	52.54	87.55	64.82	66.76	55.16	68.41	54.06	68.76
2003	VA2	RIL	2	OH02-16167	75.85	56.91	80	25.1	24.65	14.52	10.25	54.61	116	107.23	51.45	87.33	65	68.63	55.1	71.04	53.48	71.29
2003	VA2	RIL	2	OH02-16255	76.01	57.03	80	24.96	24.86	14.25	10.41	54.1	116.04	106.2	52.57	86.06	64.03	68.8	54.83	70.64	53.6	70.91
2002	VA2	RIL	3	OH02-16209	80.93	60.7	80	25.59	26.15	14.34	11.1	53.2	116.2	101.47	52.9	87.7	62.7	68.01	51.94	70.03	50.58	69.79
2003	VA2	RIL	1	OH02-16303	77.87	58.41	80	25.59	23.02	15	9.58	55.84	116.31	112.23	51.12	89.81	65.54	68.01	57.69	71.46	55.38	72.03
2003	VA2	RIL	2	OH02-16292	77.48	58.12	80	26.19	25.11	14.46	10.06	55.65	116.45	109.02	51.35	90.62	64.37	67.26	53.34	69.54	51.81	69.5
2003	VA2	RIL	1	OH02-16301	79.69	59.8	80	23.3	27.24	14.15	10.06	52.81	116.62	109.21	50.06	85.52	62.38	70.88	51.96	72.5	50.87	72.31
2003	VA2	RIL	1	OH02-16238	77.36	58	80	25.57	25.3	14.41	10.66	52.36	116.75	105.13	51.3	89.7	60.62	68.04	53.52	70.21	52.06	70.22
2003	VA2	RIL	1	OH02-16313	76.99	57.8	80	25.33	22.5	14.16	9.8	53.69	116.77	111.16	50.42	88.15	62.35	68.34	58.84	69.98	57.74	70.96
2003	VA2	RIL	1	OH02-16215	77.89	58.43	80	26.68	22.99	14.73	10.13	59.16	116.78	108.89	53.84	94.2	68.29	66.65	56.88	69.53	54.95	70.03
2003	VA2	RIL	2	OH02-16215	77	57.77	80	26.06	23.49	14.31	10.37	56.48	116.93	107.36	54.63	91.01	67.29	67.43	56.45	69.38	55.14	69.91
2002	VA2	RIL	3	OH02-16296	83.71	62.8	80	24.46	25.11	13.98	10.04	51.8054	117.1	109.86	52.1	90.5	63.3	69.43	54.79	70.68	53.95	71.01
2003	VA2	RIL	2	OH02-16305	76.27	57.23	80	25.15	24.33	14.36	10.53	55.68	117.75	107.05	50.43	86.94	62.36	68.56	55.64	70.63	54.26	71.01
2003	VA2	RIL	1	OH02-16268	75.79	56.87	80	26.35	24	14.69	10.98	55.54	117.82	103.95	52.27	90.71	66.12	67.06	55.27	69.85	53.4	70.08
2003	VA2	RIL	1	OH02-16167	76.58	57.5	80	24.45	26.01	14.34	10.85	53.11	117.86	104.92	53.31	87.52	63.09	69.44	53.18	71.46	51.82	71.43
2002	VA2	RIL	3	OH02-16208	80.01	60	80	25.97	25.36	14.35	10.49	50.9	117.9	107.46	50.3	87.6	61.1	67.54	53.06	69.58	51.69	69.53
2003	VA2	RIL	2	OH02-16258	77.18	57.9	80	29.18	21.11	15.09	10.14	61.96	117.97	109.96	54.57	99.45	72.14	63.525	58.4612	67.1731	56.0141	67.8555
2003	VA2	RIL	2	OH02-16224	77.15	57.88	80	24.89	24.82	14.46	9.65	53.26	118.15	113.58	48.8	82.94	61.51	68.89	54.96	71.18	53.43	71.42
2002	VA2	RIL	3	OH02-16255	81.56	61.2	80	23.38	26.54	14.43	10.49	49.9	118.7	108.32	49.9	82.8	58.6	70.78	53.13	72.99	51.64	72.93
2003	VA2	RIL	1	OH02-16183	76.49	57.39	80	26.68	24.08	14.91	10.12	56.24	118.76	110.94	51.9	89.32	63.61	66.65	54.84	69.9	52.66	70.02
2003	VA2	RIL	1	OH02-16201	77.38	58.05	80	25.7	25.06	14.9	10.42	55.33	118.78	108.87	51.95	87.95	62.73	67.88	53.85	71.12	51.68	71.06
2003	VA2	RIL	2	OH02-16259	74.75	56.09	80	25.76	23.21	14.22	10	56.62	118.87	111.87	50.94	88.24	66.19	67.8	57.21	69.55	56.03	70.24
2002	VA2	RIL	3	OH02-16176	82.09	61.6	80	25.99	23.66	14.21	9.87	53.8	118.9	112.81	53.5	94.2	66.1	67.51	56.19	69.25	55.03	69.77
2003	VA2	RIL	2	OH02-16266	78.27	58.71	80	27.46	23.59	15.24	9.39	55.9	120.67	117.92	50.83	87.01	62.99	65.675	55.1009	69.6538	52.4319	69.7272
2002	VA2	RIL	3	OH02-16169	83.68	62.7	80	24.73	28.15	14.27	10.35	52.9	122.6	113.16	53.2	86	62.9	69.09	49.07	70.96	47.81	70.25
2003	VA2	RIL	2	OH02-16196	77.19	57.91	80	24.69	28.87	14.39	10.95	55.86	122.74	109.12	52.36	87.79	64.95	69.14	47.8	71.28	46.37	70.32
2002	VA2	RIL	3	OH02-16175			76.45	23.57	25.91	13.9	11.65	51.8	124.1	105.62	52.7	84.4	61.7	69.17	51	70.25	50.28	69.96
2003	VA2	RIL	1	OH02-16276	76.33	57.27	80	26.34	23.31	14.64	10.16	56.57	124.37	116.25	52.4	92.04	65.42	67.08	56.56	69.75	54.77	70.22
2003	VA2	RIL	2	OH02-16169	79.32	59.49	80	25.67	25.92	14.31	10.37	58.64	125.26	115.67	54.76	91.32	67.25	67.91	52.29	69.88	50.97	69.71
2003	VA2	RIL	1	OH02-16196	77.88	58.42	80	24.64	27.92	14.85	10.7	55.76	125.76	113.83	53.17	90.71	64.61	69.2	49.57	72.33	47.47	71.56
2003	VA2	RIL	2	OH02-16276	74.66	56.03	80	25.75	23.94	14.3	10.37	53.31	126.09	116.53	51.76	87.42	63.43	67.81	55.87	69.75	54.57	70.19
2003	VA2	RIL	1	OH02-16296	78.49	58.88	80	25.89	23.08	14.45	10.09	58.28	127.67	120.04	53.18	90.39	66.6	67.64	57.35	69.89	55.83	70.54
2003	VA2	RIL	1	OH02-16176	76.79	57.61	80	27.34	23.04	15.1	10.24	56.96	130.68	122.01	54.81	94.22	69.74	65.83	56.25	69.49	53.79	69.79
2003	VA2	RIL	2	OH02-16176	77.08	57.83	80	27.17	23.19	14.54	10.17	59.35	132.17	123.96	53.53	94.48	68.94	66.04	56.1	68.49	54.46	68.91
2003	VA2	RIL	2	OH02-16296	77.28	57.98	80	26.5	22.85	14.29	10.55	55.77	132.99	122.15	53.12	93.1	67.89	66.88	57.29	68.78	56.01	69.47
2003	VA2	RIL	1	OH02-16169	79.46	59.6	80	25.76	25.82	14.28	10.7	55.45	133.86	121.95	56.02	93.4	67.06	67.8	52.4	69.7	51.12	69.55

## Sheet: VA2 means
POP	NAME	TYPE	TW	PRO		AWRC	LA		LAADJ	H2O	SUC	NACO	FYLD		SE
VA2	OH02-16171	RIL	59.14	10.42	4	53.15	98.08	30	88.16	51.83	82.12	61.97	72.65	15	47.19	1
VA2	OH02-16196	RIL	59.19	10.49	4	53.71	113.31	22	102.95	52.29	86.73	63.21	73.03	4	47.25	2
VA2	OH02-16235	RIL	58.33	10.76	5	52.55	102.3	23	90.23	51.28	82.63	61.02	73.81	12	47.59	3
VA2	OH02-16234	RIL	59.02	10.37	4	53.56	104.2	36	94.48	51.43	83.98	61.25	71.82	43	47.7	4
VA2	OH02-16291	RIL	59.53	10	3	52.77	96.87	21	89.8	51.53	82.3	61.2	74.1	13	47.93	5
VA2	OH02-16246	RIL	58.27	10.12	3	53.38	99.33	36	91.54	52.17	82.98	62.68	70.74	33	48.1	6
VA2	OH02-16270	RIL	58.18	10.89	5	53.84	95.46	13	82.27	50.45	83.36	60.95	72.2	8	48.23	7
VA2	OH02-16202	RIL	59.96	10	3	54.86	93.88	1	87.12	52.33	84.58	63.58	70.18	9	48.85	8
VA2	OH02-16297	RIL	58.75	10.3	4	55.53	101.47	14	92.26	52.85	85.78	65.48	71.85	49	49.39	1
VA2	OH02-16197	RIL	58.91	10.16	3	52.42	95.89	16	87.89	50.6	82.8	61.14	72.97	1	49.41	2
VA2	OH02-16218	RIL	58.64	10.09	3	52.46	101.8	17	94.07	49.99	81.71	60.05	73.39	6	49.42	3
VA2	OH02-16230	RIL	58.83	10.02	3	54.76	100.62	6	93.67	52.72	84.33	64.15	72.39	12	49.56	4
VA2	OH02-16278	RIL	58.38	9.87	3	53.2	94.32	7	88.21	50.1	81.62	60.55	74.27	14	49.62	5
VA2	OH02-16229	RIL	58.33	10.43	4	54.19	88.29	2	78.38	51.36	82.09	61.75	71.45	25	49.72	6
VA2	OH02-16188	RIL	60.27	10.2	3	53.1	102.04	19	93.78	52.03	84.63	62.91	72.21	9	50.27	1
VA2	OH02-16169	RIL	60.25	10.49	4	55.43	122.95	27	112.66	54.45	90.41	65.35	70	2	50.32	2
VA2	OH02-16274	RIL	57.85	10.49	4	54.91	81.45	3	70.93	51.78	84.62	63.52	71.86	51	50.38	3
VA2	OH02-16265	RIL	58.33	10.36	4	54	103.31	31	93.92	51	86.16	62.47	73.01	3	50.4	4
VA2	OH02-16164	RIL	59.49	10.52	4	53.47	107.81	5	97.14	51.8	85.57	62.52	71.15	11	50.47	5
VA2	OH02-16277	RIL	57.9	10.1	3	53.7	108.27	8	100.61	52.23	85.8	62.68	71.83	46	50.48	6
VA2	OH02-16233	RIL	57.1	10.58	5	52.61	101.47	15	90.58	49.7	81.1	60.12	73.31	5	50.5	7
VA2	OH02-16275	RIL	59.17	10.54	4	54.02	103.27	30	92.45	51.32	86.38	62.84	73.43	7	50.57	8
VA2	OH02-16252	RIL	58.21	10.07	3	53.51	92.88	14	85.39	50	81.83	61	73.7	11	50.59	9
VA2	OH02-16191	RIL	59.16	10.11	3	52.97	105.57	41	97.7	50.16	82.57	60.61	72.3	10	50.61	10
VA2	OH02-16307	RIL	57.8	10.36	4	54.05	102.42	24	92.97	52.73	84.17	63.44	70.56	24	50.62	11
VA2	OH02-16301	RIL	59.44	10.16	3	53	110.94	19	102.96	50.67	85.7	63.49	71.88	52	50.72	12
VA2	OH02-16194	RIL	59.08	10.49	4	54.57	93.71	18	83.37	52.7	87.62	64.93	71.3	17	50.84	13
VA2	OH02-16175	RIL	59.58	10.66	5	53.22	111.62	20	100.14	51.4	84.88	63.01	71.61	32	50.93	14
VA2	OH02-16248	RIL	57.4	10.97	5	53.51	93.15	16	79.34	51.4	83.57	63.93	71.78	41	50.95	1
VA2	OH02-16223	RIL	58.25	10.08	3	53.56	100.68	9	93.21	51.64	84.43	63.01	72.65	17	50.95	2
VA2	OH02-16165	RIL	59.65	10.14	3	53.93	99.46	38	91.53	51.19	84.17	62.48	71.13	10	51.12	3
VA2	OH02-16249	RIL	58.49	10.45	4	53.22	80.4	1	70.34	51.58	82.51	62.07	72.17	7	51.17	4
VA2	OH02-16243	RIL	57.41	10.3	4	54.81	103.58	32	94.57	52.43	86.43	63.47	69.94	14	51.28	5
VA2	OH02-16304	RIL	59.01	10.07	3	53.22	94.03	3	86.77	51.55	84.27	63.04	72.09	5	51.46	6
VA2	OH02-16161	RIL	59	10.15	3	53.54	96.14	18	88.02	52.15	86.2	63.95	70.9	41	51.51	7
VA2	OH02-16253	RIL	58.7	10.01	3	52.37	90.09	6	83.2	50.71	82.84	62.5	72.99	2	51.67	8
VA2	OH02-16226	RIL	57.78	10	3	54.58	100.56	5	93.61	52.3	86.35	64.62	71.07	7	51.68	9
VA2	OH02-16178	RIL	58.99	10.51	4	53.28	99.1	35	88.54	51.38	84.87	62.44	71.42	23	51.8	10
VA2	OH02-16192	RIL	59.5	9.29	1	54.08	103.93	34	102.04	52.05	86.38	64.06	71.33	21	51.9	11
VA2	OH02-16292	RIL	59.2	10.2	3	53.48	110.56	18	102.14	51.6	87.46	63.37	70.89	40	52	12
VA2	OH02-16242	RIL	57.28	10.71	5	53.48	97.81	25	86.03	52.52	83.89	64.5	70.99	2	52.01	13
VA2	OH02-16227	RIL	58.34	10.45	4	52.94	98.35	32	88.25	51.29	83.88	62.51	72.65	18	52.01	14
VA2	OH02-16272	RIL	58.51	9.49	2	53.21	97.97	27	94.44	50.35	82.94	61.42	71.65	34	52.03	15
VA2	OH02-16267	RIL	58.3	10.32	4	54.38	91.83	10	82.52	52.43	86.07	64.66	71.85	48	52.1	1
VA2	OH02-16177	RIL	57.06	10.24	3	55.71	97.52	24	88.76	53.55	86.87	67.48	70.01	3	52.22	2
VA2	OH02-16231	RIL	59.15	9.63	2	53.3	94.37	8	89.79	50.91	83.65	62.63	72.43	13	52.35	3
VA2	OH02-16167	RIL	57.77	10.57	5	52.63	110.12	17	99.34	51.63	85.73	62.78	71.31	19	52.37	4
VA2	OH02-16182	RIL	59.67	9.93	3	52.9	106.59	47	99.99	49.46	82.83	61.29	71.07	6	52.41	5
VA2	OH02-16219	RIL	59.26	9.92	3	52.57	91.04	8	84.52	49.81	81.22	61.19	72.91	23	52.43	6
VA2	OH02-16211	RIL	58.95	10.56	5	55.04	95.95	17	85.07	53.33	87.16	64.12	71.17	12	52.5	7
VA2	OH02-16189	RIL	59.59	9.74	2	54.05	89.93	5	84.87	51.02	85.75	64.24	71.57	30	52.52	8
VA2	OH02-16199	RIL	59.28	9.98	3	53.84	91.27	9	84.36	51.07	83.44	61.81	72.65	16	52.62	9
VA2	OH02-16205	RIL	57.71	9.64	2	54.23	101.58	16	97.08	51.75	86.82	63.92	70.69	29	52.65	10
VA2	OH02-16281	RIL	58.36	10.44	4	53.55	100.08	2	89.9	50.97	86.08	62.38	72.79	20	52.67	11
VA2	OH02-16298	RIL	57.07	10.38	4	53.16	106.41	46	96.77	50.65	84.36	62.13	71.75	39	52.73	12
VA2	OH02-16290	RIL	59	10.1	3	53.79	103.18	29	95.54	52.18	85.75	63.71	70.31	14	52.81	13
VA2	OH02-16221	RIL	57.95	10.21	3	52.56	105.15	39	96.66	50.28	83.7	61.69	71.82	42	52.83	14
VA2	OH02-16185	RIL	58.27	10.48	4	54.59	105.65	42	95.39	52.53	89.35	64.97	70.18	8	52.85	15
VA2	OH02-16174	RIL	59.12	9.75	2	53.4	109.68	15	104.53	50.92	85.28	62.35	71.12	9	52.87	16
VA2	OH02-16187	RIL	57.68	9.91	3	52.86	87.55	1	81.26	51.07	82.55	61.79	73.54	9	52.91	17
VA2	OH02-16255	RIL	58.4	10.6	5	53.86	108.73	9	97.59	52.19	87.57	63.98	70.89	39	53.02	18
VA2	OH02-16318	RIL	59.16	10.07	3	54.78	102.97	25	95.57	53.27	87.32	66.41	71.17	14	53.05	1
VA2	OH02-16172	RIL	58.36	10.15	3	53.54	85.83	8	77.92	51.14	84.72	62.56	72.14	6	53.07	2
VA2	OH02-16217	RIL	57.45	10.35	4	54.22	107.74	4	98.3	52.47	86.85	63.78	71.76	40	53.08	3
VA2	OH02-16209	RIL	59.18	10.42	4	54.38	114.07	23	104.13	51.9	88.46	64.5	70.74	32	53.09	4
VA2	OH02-16269	RIL	59.09	10.24	3	52.52	103.63	33	94.99	50.86	85.52	61.82	73.51	8	53.12	5
VA2	OH02-16238	RIL	57.53	10.4	4	54.18	98.02	29	88.18	51.03	88.56	62.75	70.55	22	53.14	6
VA2	OH02-16261	RIL	57.72	9.72	2	54	81.92	5	77.07	50.25	83.71	63.16	71.05	4	53.2	7
VA2	OH02-16208	RIL	57.62	10.27	4	53.66	108.91	10	100.05	51.33	86.79	64.34	70.08	5	53.21	8
VA2	OH02-16201	RIL	59.44	10.27	4	55.13	98.41	33	89.63	52.95	88.88	65.18	70.62	27	53.23	9
VA2	OH02-16250	RIL	58.54	9.88	3	54.85	94.9	11	88.84	53.04	88.61	66.47	70.34	17	53.32	10
VA2	OH02-16162	RIL	58.73	10.76	5	56.07	107.56	3	95.4	54.23	90.53	67.29	69.07	3	53.36	11
VA2	OH02-16259	RIL	57.66	9.97	3	54.16	106.96	1	100.17	51.45	85.08	63.97	71.83	45	53.36	12
VA2	OH02-16288	RIL	57.28	10.15	3	54.19	81.01	2	72.93	51.94	84.53	64.12	71.5	27	53.37	13
VA2	OH02-16308	RIL	57.28	10.32	4	54.58	77.49		68.29	52.63	84.19	64.3	71.6	31	53.4	14
VA2	OH02-16268	RIL	56.83	10.75	5	54.46	107.01	2	94.94	51.93	86.79	64.09	70.82	37	53.41	15
VA2	OH02-16284	RIL	59.27	9.49	2	54.14	98.09	31	94.63	52.24	85.17	64.89	71.97	2	53.43	16
VA2	OH02-16293	RIL	57.82	10.17	3	53.37	94.25	6	86.15	51.83	84.06	64.61	70.75	35	53.45	17
VA2	OH02-16179	RIL	58.25	10.91	5	55.9	96.45	20	83.16	53.87	88.15	67.03	70.07	4	53.46	18
VA2	OH02-16222	RIL	59.34	9.71	2	53.38	105.68	44	100.69	49.63	84.14	61.75	72.39	11	53.54	19
VA2	OH02-16251	RIL	58.96	10.1	3	56.08	100.28	3	92.69	52.57	88.21	66.64	69.92	13	53.57	20
VA2	OH02-16228	RIL	57.69	9.56	2	54.53	92.21	11	88.44	52.24	85.52	65.29	70.76	36	53.67	21
VA2	OH02-16295	RIL	58.91	9.85	3	55.41	96.98	23	91.15	52.61	87.09	66.7	70.63	28	53.68	22
VA2	OH02-16287	RIL	57	9.81	2	52.77	101.24	12	95.59	50.78	83.65	62.72	71.74	38	53.73	23
VA2	OH02-16181	RIL	56.98	9.85	3	54.38	105.36	40	99.5	52.85	86.52	63.56	70.83	38	53.74	24
VA2	OH02-16286	RIL	58.88	9.87	3	53.03	102.3	22	96.24	49.83	82.47	62.42	71.3	18	53.82	25
VA2	OH02-16273	RIL	58.23	9.69	2	52.72	97.86	26	93.18	50.06	83.95	61.7	71.99	4	53.93	26
VA2	OH02-16276	RIL	58.13	10.22	3	53.65	117.64	24	109.27	51.4	87.71	63.32	70.32	16	53.94	27
VA2	OH02-16195	RIL	59.32	9.6	2	52.83	109.15	13	105.14	50.6	84.73	61.71	71.54	28	53.94	28
VA2	OH02-16224	RIL	58.2	9.92	3	52.66	109.92	16	103.54	49.73	82.38	61.92	72.48	14	54.03	29
VA2	OH02-16279	RIL	58.1	10.11	3	53.47	89.26	4	81.65	50.59	82.53	62.22	73.62	10	54.07	1
VA2	OH02-16193	RIL	59.42	9.93	3	55.06	89.23	3	82.79	51.33	84.7	63.58	71.39	22	54.13	2
VA2	OH02-16311	RIL	57.8	10.33	4	53.71	92.79	12	83.4	51.92	87.26	65.3	71.06	5	54.17	3
VA2	OH02-16247	RIL	59.24	10.27	4	53.76	94.74	9	85.96	51.19	85.99	63.92	71.08	8	54.22	4
VA2	OH02-16282	RIL	58.15	9.74	2	56.13	93.24	17	88.05	53.43	87.8	67.04	71.17	13	54.41	5
VA2	OH02-16316	RIL	57.22	9.78	2	55.67	101.39	13	95.92	52.55	88.18	65.57	69.31	5	54.44	6
VA2	OH02-16262	RIL	57.85	9.99	3	56.74	100.42	4	93.73	53.83	91.5	68.54	70.42	20	54.44	7
VA2	OH02-16314	RIL	59.48	9.96	3	56.21	86.05	10	79.46	52.21	86.67	66.02	70.6	26	54.47	8
VA2	OH02-16266	RIL	59.5	9.52	2	54.25	112.48	21	108.93	50.78	88.11	63.74	71.62	33	54.52	9
VA2	OH02-16305	RIL	57.72	10.66	5	53.87	109.56	14	97.92	50.78	86.68	63.04	71.85	50	54.52	10
VA2	OH02-16309	RIL	57.23	10.03	3	55.28	99.42	37	92.33	52.97	86.54	64.64	70.71	31	54.54	11
VA2	OH02-16163	RIL	57.42	10.27	4	53.98	99.88	1	91.19	51.05	84.3	63.5	69.74	11	54.57	12
VA2	OH02-16225	RIL	58.57	10.71	5	56.19	86.36	11	74.32	54.02	88.42	69.09	69.95	1	54.6	13
VA2	OH02-16237	RIL	56.13	10.5	4	53.21	100.71	10	90.24	51.42	86.3	63.44	70.75	34	54.6	14
VA2	OH02-16236	RIL	57.89	10.01	3	55.82	104.04	35	96.95	53.73	88.82	65.82	70.24	11	54.63	15
VA2	OH02-16170	RIL	58.35	9.96	3	54.42	81.54	4	74.99	51.73	87.05	64.56	71.44	24	54.63	16
VA2	OH02-16315	RIL	59.02	9.85	3	55.51	78.78		72.92	52.74	85.83	66.42	71.82	44	54.79	17
VA2	OH02-16299	RIL	58.79	9.6	2	54.83	105.67	43	101.52	52.55	89.32	66.9	70.56	23	54.88	18
VA2	OH02-16215	RIL	59.05	9.89	3	56.06	108.22	7	102.13	53.41	91.21	67.47	70.13	6	54.93	19
VA2	OH02-16310	RIL	57.86	9.97	3	56.86	94.88	10	88.09	53.5	89.61	69.23	69.66	8	54.99	20
VA2	OH02-16294	RIL	57.47	9.39	1	54.63	106.4	45	103.73	50.91	86.08	64.52	70.17	7	55	21
VA2	OH02-16303	RIL	59.18	9.71	2	54.16	109.06	12	104.19	51.09	87.94	64.72	71.27	16	55.04	22
VA2	OH02-16271	RIL	58.26	8.97	1	55	85.4	7	85.53	51.62	85.59	63.96	71.84	47	55.05	1
VA2	OH02-16256	RIL	57.78	9.84	2	55.08	79.82		73.94	51.33	85.99	64.55	71.31	20	55.12	2
VA2	OH02-16204	RIL	57.49	9.33	1	54.42	104.69	37	102.49	52.25	87.86	65.38	70.18	10	55.14	3
VA2	OH02-16176	RIL	58.81	10.08	3	56.51	122.3	25	114.76	53.88	93.39	68.59	69.26	4	55.19	4
VA2	OH02-16245	RIL	59.58	10.81	5	54.4	100.63	7	88.02	52.5	89.61	65.21	70.6	25	55.26	5
VA2	OH02-16241	RIL	58.3	10.32	4	54.85	85.33	6	76.11	52.39	87.96	65.43	70.96	1	55.28	6
VA2	OH02-16257	RIL	60.14	9.44	1	53.03	108.02	6	105.03	49.4	84.04	63.3	71.98	3	55.34	7
VA2	OH02-16296	RIL	59.92	10.13	3	55.08	122.58	26	114.75	52.85	90.87	66.53	69.7	10	55.38	8
VA2	OH02-16166	RIL	56.38	10.36	4	54.06	100.66	8	91.39	49.67	83.65	62.95	72.68	19	55.52	9
VA2	OH02-16206	RIL	57.57	9.96	3	55.36	102.29	21	95.64	52.73	89.05	65.88	69.46	6	55.65	10
VA2	OH02-16283	RIL	57.81	10.42	4	54.83	90.36	7	80.53	51.54	86.19	64.28	71.69	37	55.73	11
VA2	OH02-16168	RIL	57.31	9.52	2	54.61	93.92	2	90.49	51.85	86.02	65.11	71.57	29	55.76	12
VA2	OH02-16203	RIL	58.59	9.56	2	52.79	103.18	28	99.25	48.94	83.68	61.79	71.01	3	55.77	13
VA2	OH02-16263	RIL	56.52	9.97	3	53.48	104.93	38	98.15	50.66	84.53	63.54	71.26	15	55.79	14
VA2	OH02-16289	RIL	58.33	10.11	3	53.08	96.88	22	89.24	50.28	84.58	62.79	71.66	36	55.83	15
VA2	OH02-16214	RIL	57.77	10.22	3	55.08	86.03	9	77.55	52.27	84.68	64.7	71.9	54	55.94	16
VA2	OH02-16306	RIL	58.92	10.02	3	54.53	98.69	34	91.61	49.75	85.21	63.34	71.89	53	55.97	17
VA2	OH02-16207	RIL	57.92	9.88	3	53.83	95.56	14	89.34	50.85	85.2	63.87	70.31	13	56.05	1
VA2	OH02-16186	RIL	57.06	9.8	2	53.53	99.64	39	94.15	50.29	84.05	62.49	70.29	12	56.06	2
VA2	OH02-16173	RIL	58.84	9.15	1	54.4	102.98	26	101.95	51.56	86.98	65.78	70.49	21	56.15	3
VA2	OH02-16312	RIL	58.27	9.33	1	52.4	103.13	27	100.83	48.63	81.57	60.93	72.9	22	56.17	4
VA2	OH02-16183	RIL	57.77	9.85	3	54.89	95.15	12	89.11	51.17	87.69	65.68	69.78	12	56.3	5
VA2	OH02-16212	RIL	56.91	10	3	59.86	86.6	12	79.63	51.87	85.53	65.12	71.96	1	56.45	6
VA2	OH02-16216	RIL	58.54	9.2	1	53.29	100.75	11	99.32	48.86	82.1	61.87	72.84	21	56.52	7
VA2	OH02-16198	RIL	57.05	10.62	5	56.15	92.91	15	81.61	53.25	93.12	68.82	68.39	1	56.56	8
VA2	OH02-16317	RIL	58.05	9.54	2	56.62	92.87	13	89.07	53.07	90.63	68.71	69.46	7	56.85	9
VA2	OH02-16313	RIL	58.46	9.54	2	52.83	109.03	11	105.16	49.75	84.02	61.59	70.31	15	57.03	1
VA2	OH02-16244	RIL	56.93	9.95	3	54.83	95.72	15	89.23	51.44	90	65.55	70.7	30	57.08	2
VA2	OH02-16285	RIL	57.16	9.89	3	53.15	96.33	19	90.2	49.99	83.24	62.73	71.66	35	57.09	3
VA2	OH02-16254	RIL	56.36	9.29	1	56.6	101.89	18	99.77	52.42	88.96	67.36	69.69	9	57.11	4
VA2	OH02-16302	RIL	56.95	9.66	2	54.22	97.99	28	93.53	50.61	84.57	64.14	71.48	26	57.42	5
VA2	OH02-16213	RIL	59.16	9.59	2	58.15	94.17	5	90.11	52.7	90.24	68.96	70.42	19	57.66	6
VA2	OH02-16190	RIL	57.49	10.15	3	55.82	94.05	4	85.9	52.47	84.76	65.37	70.37	18	57.69	7
VA2	OH02-16258	RIL	58.49	10.15	3	59.98	106.93	48	98.78	54.46	97.3	71.55	67.96	1	60.04	8
VA2	OH02-16210	RIL	58	9.66	2	59.6	102.14	20	97.55	54.22	92.97	71.88	68.91	2	61.05	9
VA2	Pioneer 26R46	Parent		10.2	6								72
VA2	SS550	Parent		9.9	7								68.2

## Sheet: LA
Range of Lactic acid	Number of RILs
650-798	4
804-866	12
876-937	18
939-996	39
999-1069	48									Figure . Distribution of wheat recombinant inbred lines (RILs), parents means averaged over four environments for Lactic Acid solvent retention capacity
1007-1230	28
1235-1346	1

## Sheet: FP
NAME	Protein	group		Number of RILs	Range of flour protein (g kg-1)
OH02-16271	8.97	1		83-90	2
OH02-16173	9.15	1		91-94	8
OH02-16216	9.2	1		95-98	26
OH02-16192	9.29	1		99-102	63
OH02-16254	9.29	1		103-105	33
OH02-16204	9.33	1		106-109	15
OH02-16312	9.33	1		110-112	3
OH02-16294	9.39	1
OH02-16257	9.44	1
OH02-16272	9.49	2	1
OH02-16284	9.49	2	2
OH02-16168	9.52	2	3
OH02-16266	9.52	2	4
OH02-16313	9.54	2	5
OH02-16317	9.54	2	6
OH02-16203	9.56	2	7
OH02-16228	9.56	2	8
OH02-16213	9.59	2	9
OH02-16195	9.6	2	10
OH02-16299	9.6	2	11
OH02-16231	9.63	2	12							Figure . Distribution of wheat recombinant inbred lines (RILs), parents means averaged over four environments for flour protein.
OH02-16205	9.64	2	13
OH02-16210	9.66	2	14
OH02-16302	9.66	2	15
OH02-16273	9.69	2	16
OH02-16222	9.71	2	17
OH02-16303	9.71	2	18
OH02-16261	9.72	2	19
OH02-16189	9.74	2	20
OH02-16282	9.74	2	21
OH02-16174	9.75	2	22
OH02-16316	9.78	2	23
OH02-16186	9.8	2	24
OH02-16287	9.81	2	25
OH02-16256	9.84	2	26
OH02-16181	9.85	3	1
OH02-16183	9.85	3	2
OH02-16295	9.85	3	3
OH02-16315	9.85	3	4
OH02-16278	9.87	3	5
OH02-16286	9.87	3	6
OH02-16207	9.88	3	7
OH02-16250	9.88	3	8
OH02-16215	9.89	3	9
OH02-16285	9.89	3	10
OH02-16187	9.91	3	11
OH02-16219	9.92	3	12
OH02-16224	9.92	3	13
OH02-16182	9.93	3	14
OH02-16193	9.93	3	15
OH02-16244	9.95	3	16
OH02-16170	9.96	3	17
OH02-16206	9.96	3	18
OH02-16314	9.96	3	19
OH02-16259	9.97	3	20
OH02-16263	9.97	3	21
OH02-16310	9.97	3	22
OH02-16199	9.98	3	23
OH02-16262	9.99	3	24
OH02-16202	10	3	25
OH02-16212	10	3	26
OH02-16226	10	3	27
OH02-16291	10	3	28
OH02-16236	10.01	3	29
OH02-16253	10.01	3	30
OH02-16230	10.02	3	31
OH02-16306	10.02	3	32
OH02-16309	10.03	3	33
OH02-16252	10.07	3	34
OH02-16304	10.07	3	35
OH02-16318	10.07	3	36
OH02-16176	10.08	3	37
OH02-16223	10.08	3	38
OH02-16218	10.09	3	39
OH02-16251	10.1	3	40
OH02-16277	10.1	3	41
OH02-16290	10.1	3	42
OH02-16191	10.11	3	43
OH02-16279	10.11	3	44
OH02-16289	10.11	3	45
OH02-16246	10.12	3	46
OH02-16296	10.13	3	47
OH02-16165	10.14	3	48
OH02-16161	10.15	3	49
OH02-16172	10.15	3	50
OH02-16190	10.15	3	51
OH02-16258	10.15	3	52
OH02-16288	10.15	3	53
OH02-16197	10.16	3	54
OH02-16301	10.16	3	55
OH02-16293	10.17	3	56
OH02-16188	10.2	3	57
OH02-16292	10.2	3	58
OH02-16221	10.21	3	59
OH02-16214	10.22	3	60
OH02-16276	10.22	3	61
OH02-16177	10.24	3	62
OH02-16269	10.24	3	63
OH02-16163	10.27	4	1
OH02-16201	10.27	4	2
OH02-16208	10.27	4	3
OH02-16247	10.27	4	4
OH02-16243	10.3	4	5
OH02-16297	10.3	4	6
OH02-16241	10.32	4	7
OH02-16267	10.32	4	8
OH02-16308	10.32	4	9
OH02-16311	10.33	4	10
OH02-16217	10.35	4	11
OH02-16166	10.36	4	12
OH02-16265	10.36	4	13
OH02-16307	10.36	4	14
OH02-16234	10.37	4	15
OH02-16298	10.38	4	16
OH02-16238	10.4	4	17
OH02-16171	10.42	4	18
OH02-16209	10.42	4	19
OH02-16283	10.42	4	20
OH02-16229	10.43	4	21
OH02-16281	10.44	4	22
OH02-16227	10.45	4	23
OH02-16249	10.45	4	24
OH02-16185	10.48	4	25
OH02-16169	10.49	4	26
OH02-16194	10.49	4	27
OH02-16196	10.49	4	28
OH02-16274	10.49	4	29
OH02-16237	10.5	4	30
OH02-16178	10.51	4	31
OH02-16164	10.52	4	32
OH02-16275	10.54	4	33
OH02-16211	10.56	5	1
OH02-16167	10.57	5	2
OH02-16233	10.58	5	3
OH02-16255	10.6	5	4
OH02-16198	10.62	5	5
OH02-16175	10.66	5	6
OH02-16305	10.66	5	7
OH02-16225	10.71	5	8
OH02-16242	10.71	5	9
OH02-16268	10.75	5	10
OH02-16162	10.76	5	11
OH02-16235	10.76	5	12
OH02-16245	10.81	5	13
OH02-16270	10.89	5	14
OH02-16179	10.91	5	15
OH02-16248	10.97	5
Pioneer 26R46	10.2	6
SS550	9.9	7

## Sheet: FY
Range of Flour Yield (%)	Number of RILs
62.8-68.	3
68.2-69.9	15
70-70.9	41
71-71.9	54
72-72.9	23
73-73.8	12
73.9- 74.3	2
	150
74

[truncated: 1 more sheets: SE]
